# Supplementary material for: Transition metal free catalytic hydroboration of aldehydes and aldimines by amidinato silane
Source: Royal Society of Chemistry journal article supplement (doi:10.1039/c6dt04893e), 2017-01-01
Supplement: c6dt04893e1.pdf [file c6dt04893e1.pdf]

## Supplementary Information

*for*

### Transition metal free catalytic hydroboration of aldehydes and aldimines by amidinato silane

Milan Kumar Bisai,<sup>[a]</sup> Sanjukta Pahar,<sup>[a]</sup> Tamal Das,<sup>[b]</sup> Kumar Vanka\*<sup>[b]</sup> and Sakya S. Sen\*<sup>[a]</sup>

#### Contents:

- ❖ General Experimental Information.
- ❖ Stoichiometric reaction of catalyst **1** and benzaldehyde
- ❖ General catalytic procedure for the hydroboration of aldehydes.
- ❖ Optimization table of hydroboration of benzaldehyde catalysed by **1**.
- ❖ Analytical data of boronate ester and isolated primary alcohol of corresponding aldehydes.
- ❖ General catalytic procedure for the hydroboration of Imines to corresponding secondary amines.
- ❖ Optimization table of hydroboration of diphenyl imines catalysed by **1** in acetonitrile.
- ❖ Analytical data of secondary amines.
- ❖ Details of the theoretical calculations.
- ❖ Representative NMR spectra.
- ❖ References.

## General Experimental Information

All reactions were performed under argon atmosphere using Schlenk techniques or inside a MBraun glove box. Pinacolborane (HBpin), aldehydes were purchased from Sigma–Aldrich, Alfa–Aesar, and TCI and used without further purification. Imines obtained from benzaldehyde derivatives were prepared by stirring the carbonyl precursor with 1.1 equivalents of the relevant amine in dichloromethane over molecular sieves for 18 hours at room temperature, followed by filtration, solvent removal and recrystallization of the imine from hexanes.<sup>[S1]</sup> Compound **1** was synthesized by a literature procedure.<sup>[S2]</sup> Benzene was distilled from Na/benzophenone and further dried by molecular sieves prior to use. Acetonitrile was used from MBraun-SPS 800. C<sub>6</sub>D<sub>6</sub> and CDCl<sub>3</sub> were purchased from Sigma-Aldrich, were degassed by three freeze-pump-thaw cycles, and stored over molecular sieves. <sup>1</sup>H, <sup>13</sup>C{<sup>1</sup>H}NMR spectra were recorded on Bruker AV–200MHz and referenced to the resonances of the solvent used.

### Stoichiometric reaction of catalyst **1** and benzaldehyde

A solution of Benzaldehyde (0.1 g, 1 mmol) in toluene (5 mL) was added dropwise to the toluene solution (15 mL) of **1** (0.3 g, 1 mmol) at –60 °C. The reaction mixture was stirred at room temperature overnight. Volatiles of the mixture were removed under reduced pressure. The residue was extracted with toluene and concentration of the solution led to colorless solid of **Int-2**. Yield (0.40 g, 49%), <sup>1</sup>H NMR (CDCl<sub>3</sub>, 500 MHz, 298 K): δ 7.80-7.28 (m, 10H, ArH), 5.05 (s, 2H, OCH<sub>2</sub>), 1.17 (s, 18H, CH<sub>3</sub>) ppm; <sup>13</sup>C{<sup>1</sup>H} NMR (CDCl<sub>3</sub>, 125.70 MHz, 298 K): δ 31.56 (CH<sub>3</sub>), 55.45 (C(CH<sub>3</sub>)<sub>3</sub>), 66.00 (OCH<sub>2</sub>), 155.15 (NCN) ppm; <sup>29</sup>Si{<sup>1</sup>H}NMR (CDCl<sub>3</sub>, 500 MHz, 298 K): δ -101.28 ppm.

*Note: The formation of **Int-2** was always accompanied with the formation of free amidinate ligand! As a result designation of phenyl carbons in **Int-2** from the <sup>13</sup>C NMR spectrum was difficult.*

**Alternative Preparation of Int-2.** To the solution of KOBn (0.2 g, 1.36 mmol) in 10 mL toluene, toluene solution (20 mL) of PhC(NtBu)<sub>2</sub>SiCl<sub>3</sub> (0.5 g, 1.36 mmol) was added drop by drop at -78 °C. The reaction mixture was stirred for 30 min at -78 °C and then slowly allowed to room temperature and stirred overnight. The filtrate was collected by filtration through celite pad glass frit, concentrated under vacuum and kept for crystallization. Yield: 52%.

### General catalytic procedure for the hydroboration of aldehydes

Aldehyde (0.5 mmol), pinacolborane (0.5 mmol), catalyst (1 mol%), benzene (1 mL) were charged in a Schlenk tube with a magnetic bead inside the glove box. The reaction mixture was allowed to stir at room temperature. The progress of the reaction was monitored by <sup>1</sup>H

NMR, which indicated the completion of the reaction by the disappearance of aldehyde (RCHO) proton and appearance of a new OCH<sub>2</sub> resonance. For isolation of corresponding primary alcohol of few aldehyde, reactions were scaled up and carried out at same reaction condition as mentioned.

Upon completion of the reaction, three of the resulted boronate ester residue were hydrolysed by silica gel with methanol at 60 °C for 4–6 hrs. The completion of hydrolysis was checked by TLC. Upon completion, the reaction mixture was filtered and washed three times with dichloromethane. The combined organic layers were dried, evaporated and the residue was purified by column chromatography over silica gel (100–200 mesh) with pet ether/ethyl acetate (20:1) mixture as eluent, which provided the pure primary alcohols.

**Table S1. Optimization Table of Hydroboration of Benzaldehyde Catalysed by 1 in benzene**

| entry | catalyst<br>(mol%) | temp. | Time<br>(h) | Conv.<br>(%) |
|-------|--------------------|-------|-------------|--------------|
| 1     | 0.5                | rt    | 1           | 77           |
| 2     | 0.5                | 50 °C | 1           | 88           |
| 3     | 1.0                | rt    | 1           | 96           |
| 4     | 1.5                | rt    | 1           | 96           |

**Analytical data and NMR (<sup>1</sup>H, <sup>13</sup>C) spectra of boronate esters of corresponding aldehydes**

**2-(benzyloxy)-pinacolborane (2):** <sup>1</sup>H NMR (CDCl<sub>3</sub>, 200 MHz, 298 K): δ 7.28-7.18 (m, 5H,

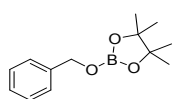

ArH), 4.85 (s, 2H, OCH<sub>2</sub>), 1.18 (s, 12H, CH<sub>3</sub>) ppm; <sup>13</sup>C{<sup>1</sup>H} NMR (CDCl<sub>3</sub>, 50.28 MHz, 298 K): δ 24.48 (CH<sub>3</sub>), 66.55 (CH<sub>2</sub>), 82.90 (C(CH<sub>3</sub>)<sub>2</sub>), 126.65 (Ph), 127.27 (Ph), 128.20 (Ph), 139.16 (ArC-R) ppm.

**2-((4-methylbenzyl)oxy)-pinacolborane (3):** <sup>1</sup>H NMR (CDCl<sub>3</sub>, 200 MHz, 298 K): δ 7.18-

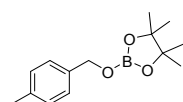

7.14 (d, <sup>3</sup>J<sub>H-H</sub>=8.0 Hz, 2H, ArH), 7.07-7.03 (d, <sup>3</sup>J<sub>H-H</sub>=7.9 Hz, 2H, ArH), 4.80 (s, 2H, CH<sub>2</sub>), 2.25 (s, 3H, ArCH<sub>3</sub>), 1.18 (s, 12H, CH<sub>3</sub>) ppm; <sup>13</sup>C{<sup>1</sup>H} NMR (CDCl<sub>3</sub>, 50.28 MHz, 298 K): δ 21.05 (Ar-CH<sub>3</sub>), 24.54 (CH<sub>3</sub>), 66.51 (CH<sub>2</sub>), 82.80 (C(CH<sub>3</sub>)<sub>2</sub>), 126.77 (Ph), 126.87 (Ph), 136.19 (Ph), 139.90 (Ph) ppm.

**2-((4-fluorobenzyl)oxy)-pinacolborane (4):**  $^1\text{H}$  NMR ( $\text{CDCl}_3$ , 200 MHz, 298 K):  $\delta$  7.30-

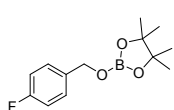

6.85 (m, 4H, *ArH*), 4.80 (s, 2H,  $\text{CH}_2$ ), 1.19 (s, 12H,  $\text{CH}_3$ ) ppm;  $^{13}\text{C}$  NMR ( $\text{CDCl}_3$ , 50.28 MHz, 298 K):  $\delta$  24.51 ( $\text{CH}_3$ ), 65.98 ( $\text{CH}_2$ ), 83.01 ( $\text{C}(\text{CH}_3)_2$ ), 115.05 (d,  $J_{\text{C-F}}=21.22$  Hz, *Ar-C*), 128.58 (d,  $J_{\text{C-F}}=8.05$  Hz, *Ar-C*), 134.88 (*Ar-C*), 162.13 (d,  $J_{\text{C-F}} = 245.17$  Hz, *ArC-F*) ppm.

**2-((4-bromobenzyl)oxy)-pinacolborane (5):**  $^1\text{H}$  NMR ( $\text{CDCl}_3$ , 200 MHz, 298 K):  $\delta$  7.36 (d,

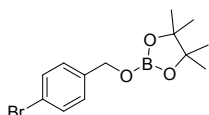

2H, *ArH*), 7.12(d, 2H, *ArH*), 4.78 (s, 2H,  $\text{CH}_2$ ), 1.18 (s, 12H,  $\text{CH}_3$ ) ppm.

**2-((3-bromobenzyl)oxy)-pinacolborane (6):**  $^1\text{H}$  NMR ( $\text{CDCl}_3$ , 200 MHz, 298 K):  $\delta$  7.49-

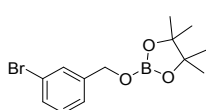

7.06 (m, 4H, *ArH*), 4.81 (s, 2H,  $\text{CH}_2$ ), 1.19 (s, 12H,  $\text{CH}_3$ ) ppm;  $^{13}\text{C}$  NMR ( $\text{CDCl}_3$ , 50.28 MHz, 298 K):  $\delta$  24.56 ( $\text{CH}_3$ ), 65.77 ( $\text{CH}_2$ ), 83.12 ( $\text{C}(\text{CH}_3)_2$ ), 125.09 (*Ph*), 129.66 (*Ph*), 129.81 (*Ph*), 130.37 (*Ph*), 137.24 (*Ph*), 141.45 (*Ph*) ppm.

**2-((2-bromobenzyl)oxy)-pinacolborane (7):**  $^1\text{H}$  NMR ( $\text{CDCl}_3$ , 200 MHz, 298 K):  $\delta$  7.47-

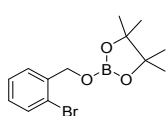

6.97(m, 4H, *ArH*), 4.90(s, 2H,  $\text{CH}_2$ ), 1.19 (s, 12H,  $\text{CH}_3$ ) ppm;  $^{13}\text{C}$  NMR ( $\text{CDCl}_3$ , 50.28 MHz, 298 K):  $\delta$  24.53 ( $\text{CH}_3$ ), 66.21 ( $\text{CH}_2$ ), 83.08 ( $\text{C}(\text{CH}_3)_2$ ), 121.45 (*Ph*), 127.27 (*Ph*), 127.73 (*Ph*), 128.54 (*Ph*), 132.18 (*Ph*), 138.25 (*Ph*)

ppm.

**2-(cinnamyloxy)-pinacolborane (8):**  $^1\text{H}$  NMR ( $\text{CDCl}_3$ , 200 MHz, 298 K):  $\delta$  7.32-7.09 (m,

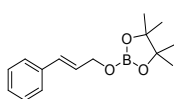

5H, *ArH*), 6.61-6.49 (d, 1H,  $^3J_{\text{H-H}}=15.7$  Hz, 1H *ArCH*), 6.29-6.13 (m, 1H, *CHCH*), 4.48-4.45 (d, 2H,  $^3J_{\text{H-H}}=5.3$  Hz,  $\text{CH}_2$ ), 1.18 (s, 12H,  $\text{CH}_3$ ) ppm;  $^{13}\text{C}$  NMR ( $\text{CDCl}_3$ , 50.28 MHz, 298 K):  $\delta$  24.51 ( $\text{CH}_3$ ), 65.17 ( $\text{CH}_2$ ), 82.87 ( $\text{C}(\text{CH}_3)_2$ ), 126.34 (*Ph*), 126.69 (*Ph*), 127.42 (*Ph*), 128.43 (*Ar-CH*), 130.54 (*Ar-CHCH*), 136.76 (*ArC-R*) ppm.

**2-(2-hydroxybenzyloxy)-pinacolborane (9):**  $^1\text{H}$  NMR ( $\text{CDCl}_3$ , 200 MHz, 298 K):  $\delta$  7.11-

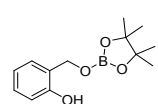

7.07 (d,  $^3J_{\text{H-H}}=7.58$  Hz, 2H, *ArH*), 6.84-6.79 (m, 2H, *ArH*), 4.90 (s, 2H,  $\text{CH}_2$ ), 1.19 (s, 12H,  $\text{CH}_3$ ) ppm;  $^{13}\text{C}$  NMR ( $\text{CDCl}_3$ , 50.28 MHz, 298 K):  $\delta$  24.45 ( $\text{CH}_3$ ), 64.50 ( $\text{CH}_2$ ), 83.49 ( $\text{C}(\text{CH}_3)_2$ ), 116.85 (*Ph*), 124.11 (*Ph*), 128.23 (*Ph*), 129.22 (*Ph*), 129.49 (*Ph*), 152.02 (*ArC-OH*) ppm.

**2-(4-hydroxybenzyloxy)-pinacolborane (10):**  $^1\text{H}$  NMR ( $\text{CDCl}_3$ , 200 MHz, 298 K):  $\delta$  7.19-

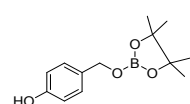

6.90 (m, 4H, *ArH*), 4.76 (s, 2H,  $\text{CH}_2$ ), 1.18 (s, 12H,  $\text{CH}_3$ ) ppm;  $^{13}\text{C}$  NMR

(CDCl<sub>3</sub>, 50.28 MHz, 298 K):  $\delta$  24.41 (CH<sub>3</sub>), 66.55 (CH<sub>2</sub>), 83.04 (C(CH<sub>3</sub>)<sub>2</sub>), 116.08 (*Ph*), 124.11 (*Ph*), 128.19 (*Ph*), 132.45 (*Ph*), 155.59 (ArC-OH) ppm.

**2-((3-methoxybenzyl)oxy)-pinacolborane (11):** <sup>1</sup>H NMR (CDCl<sub>3</sub>, 200 MHz, 298 K):  $\delta$  7.20-

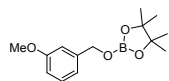

6.67 (m, 4H, ArH), 4.83 (s, 2H, CH<sub>2</sub>), 3.71 (s, 3H, OCH<sub>3</sub>), 1.18 (s, 12H, CH<sub>3</sub>) ppm; <sup>13</sup>C NMR (CDCl<sub>3</sub>, 50.28 MHz, 298 K):  $\delta$  24.49 (CH<sub>3</sub>), 55.05 (OCH<sub>3</sub>), 66.43 (CH<sub>2</sub>), 82.89 (C(CH<sub>3</sub>)<sub>2</sub>), 111.74 (*Ph*), 113.07 (*Ph*), 118.77 (*Ph*), 129.20 (*Ph*), 140.73 (*Ph*), 159.57 (ArC-OMe) ppm.

**2-((4-methoxybenzyl)oxy)-pinacolborane (12):** <sup>1</sup>H NMR (CDCl<sub>3</sub>, 200 MHz, 298 K):  $\delta$  7.22-

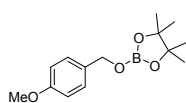

7.17 (d, <sup>3</sup>J<sub>H-H</sub>=8.84 Hz, 2H, ArH), 6.80-6.76 (d, <sup>3</sup>J<sub>H-H</sub>=8.72 Hz, 2H, ArH), 4.77 (s, 2H, CH<sub>2</sub>), 3.70 (s, 3H, OCH<sub>3</sub>), 1.18 (s, 12H, CH<sub>3</sub>) ppm.

**4-(((4,4,5,5-tetramethyl-1,3,2-dioxaborolan-2-yl)oxy)methyl)pyridine (13):** <sup>1</sup>H NMR

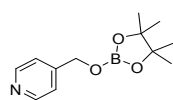

(CDCl<sub>3</sub>, 200 MHz, 298 K):  $\delta$  8.51-8.48 (d, <sup>3</sup>J<sub>H-H</sub>=6.06 Hz, 2H, ArH), 7.21-7.18 (d, <sup>3</sup>J<sub>H-H</sub>=5.81 Hz, 2H, ArH), 4.87 (s, 2H, CH<sub>2</sub>), 1.19 (s, 12H, CH<sub>3</sub>) ppm; <sup>13</sup>C NMR (CDCl<sub>3</sub>, 50.28 MHz, 298 K):  $\delta$  24.48 (CH<sub>3</sub>), 64.86 (CH<sub>2</sub>), 83.21 (C(CH<sub>3</sub>)<sub>2</sub>), 120.79 (*Ph*), 128.20 (*Ph*), 149.36 (*Ph*) ppm.

**4-(((4,4,5,5-tetramethyl-1,3,2-dioxaborolan-2-yl)oxy)methyl)benzonitrile (14):** <sup>1</sup>H NMR

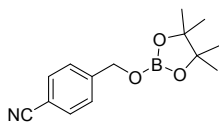

(CDCl<sub>3</sub>, 200 MHz, 298 K):  $\delta$  7.56-7.52 (d, <sup>3</sup>J<sub>H-H</sub>=8.46 Hz, 2H, ArH), 7.38-7.33 (d, <sup>3</sup>J<sub>H-H</sub>=7.83 Hz, 2H, ArH), 4.89 (s, 2H, CH<sub>2</sub>), 1.19 (s, 12H, CH<sub>3</sub>) ppm.

**2-isobutoxy-4,4,5,5-tetramethyl-1,3,2-dioxaborolane (15):** <sup>1</sup>H NMR (CDCl<sub>3</sub>, 200 MHz,

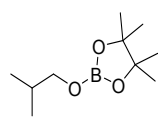

298 K):  $\delta$  3.60 (d, <sup>3</sup>J<sub>H-H</sub>=6.57 Hz, 2H, CH<sub>2</sub>), 1.81 (sept, 1H, CH(CH<sub>3</sub>)<sub>2</sub>), 1.25 (s, 12H, CH<sub>3</sub>), 0.88 (d, <sup>3</sup>J<sub>H-H</sub>=6.69 Hz, 6H, CH(CH<sub>3</sub>)<sub>2</sub>) ppm; <sup>13</sup>C NMR (CDCl<sub>3</sub>, 50.28 MHz, 298 K):  $\delta$  82.42 (C(CH<sub>3</sub>)<sub>2</sub>), 71.21 (CH<sub>2</sub>), 29.68 (CH(CH<sub>3</sub>)<sub>2</sub>), 24.43 (CH<sub>3</sub>), 18.61 (CH<sub>3</sub>) ppm.

### Isolation of primary alcohols

In three cases, we have performed the hydrolysis and isolated the primary alcohols:

**4-bromo benzyl alcohol (5')**: Yield: 146.5 mg (78.3%); <sup>1</sup>H NMR (CDCl<sub>3</sub>, 200 MHz, 298 K):

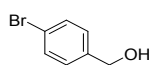

$\delta$  7.42-7.37 (d, <sup>3</sup>J<sub>H-H</sub>=8.46 Hz, 2H, ArH), 7.17-7.13 (d, <sup>3</sup>J=7.83 Hz, 2H, ArH), 4.55 (s, 2H, CH<sub>2</sub>), 1.61 (s, 1H, OH) ppm; <sup>13</sup>C NMR (CDCl<sub>3</sub>, 50.28 MHz, 298 K):  $\delta$  64.58 (CH<sub>2</sub>), 128.32 (*Ph*), 128.57 (*Ph*), 139.74 (*Ph*) ppm.

**(Pyridine-4-yl)methanol (13')**: Yield: 89.5 mg (83%); <sup>1</sup>H NMR (CDCl<sub>3</sub>, 200 MHz, 298 K):

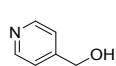

$\delta$  8.48-8.45 (d, <sup>3</sup>J<sub>H-H</sub>=5.94 Hz, 2H, ArH), 7.31-7.28 (d, <sup>3</sup>J<sub>H-H</sub>=6.06 Hz, 2H, ArH), 4.74 (s, 2H, CH<sub>2</sub>), 3.99 (s, 1H, OH) ppm; <sup>13</sup>C NMR (CDCl<sub>3</sub>, 50.28 MHz, 298 K):  $\delta$  62.97 (CH<sub>2</sub>), 121.20(Ph), 149.27(Ph), 151.02 (Ph) ppm.

**4-cyano benzylalcohol (14')**: Yield: 53 mg (40%); <sup>1</sup>H NMR (CDCl<sub>3</sub>, 200 MHz, 298 K):  $\delta$

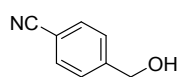

7.67-7.63 (d, <sup>3</sup>J<sub>H-H</sub>=8.34 Hz, 2H, ArH), 7.50-7.46 (d, <sup>3</sup>J<sub>H-H</sub>=8.59 Hz, 2H, ArH), 4.79 (s, 2H, CH<sub>2</sub>), 2.05 (s, 1H, OH) ppm; <sup>13</sup>C NMR (CDCl<sub>3</sub>, 50.28 MHz, 298 K):  $\delta$  24.7 (CH<sub>3</sub>), 64.17 (CH<sub>2</sub>), 111.11 (C-CN), 118.83 (CN), 126.98 (Ph), 132.28 (Ph), 146.19 (ArC-CN) ppm.

### General catalytic procedure for the hydroboration of Imines

Imine (1 mmol), pinacolborane (1 mmol), catalyst **1** (2 mol %), acetonitrile (1 mL) were charged in a Schlenk tube with a magnetic bead inside the glove box. The reaction mixture was allowed to stir at room temperature and then slowly heated at 65 °C for 48-72 h. The progress of the reaction was monitored by <sup>1</sup>H NMR, which indicated the completion of the reaction by the disappearance of Imine (RCHNR') proton and appearance of a new CH<sub>2</sub> resonance. Upon completion of the reaction, resulted boronate ester residues were hydrolysed with silica gel and methanol at 65 °C for 4-6 h. The completion of hydrolysis was checked by TLC. Upon completion, the reaction mixture was filtered and washed three times with dichloromethane. The combined organic layers were dried, evaporated and the residue was purified by column chromatography over silica gel (100–200 mesh) with pet ether/ethyl acetate (1:5) mixture as eluent, which provided the pure secondary amines.

**Table S2. Optimization Table of Hydroboration of diphenyl imines Catalysed by **1** in acetonitrile**

| entry | catalyst (mol%) | temp. | Time (h) | Conv. (%) |
|-------|-----------------|-------|----------|-----------|
| 1     | 1               | rt    | 24       | 0         |
| 2     | 2               | rt    | 24       | Trace     |
| 3     | 2               | 65°C  | 24       | 70        |
| 4     | 2               | 65°C  | 48       | 95        |

### Isolation of secondary amines

**N-benzylaniline (16)**: Isolated Yield: 157.5 mg (86%); <sup>1</sup>H NMR (CDCl<sub>3</sub>, 200 MHz, 298 K):

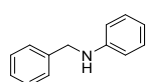

$\delta$  7.36-7.13 (m, 7H, ArH), 6.74-6.61 (m, 3H, ArH), 4.32 (s, 2H, CH<sub>2</sub>), 4.01 (s,

1H, NH) ppm;  $^{13}\text{C}\{^1\text{H}\}$  NMR ( $\text{CDCl}_3$ , 50.28 MHz, 298 K):  $\delta$  148.11, 139.40, 129.23, 128.60, 127.48, 127.19, 117.53, 112.81 (*Ph*), 48.29 ( $\text{CH}_2$ ) ppm.

**N-(4-methylbenzyl)aniline (17):** Isolated Yield: 146 mg (74%);  $^1\text{H}$  NMR ( $\text{CDCl}_3$ , 200 MHz, 298 K):  $\delta$  7.20-7.05 (m, 6H, *ArH*), 6.67-6.53 (m, 3H, *ArH*), 4.20 (s, 2H,  $\text{CH}_2$ ), 3.89 (s, 1H, *NH*), 2.26 (s, 3H,  $\text{CH}_3$ ) ppm;  $^{13}\text{C}\{^1\text{H}\}$  NMR ( $\text{CDCl}_3$ , 50.28 MHz, 298 K):  $\delta$  148.19, 136.84, 136.33, 129.27, 129.22, 127.49, 117.45, 112.80 (*Ph*), 48.05 ( $\text{CH}_2$ ), 21.07 ( $\text{CH}_3$ ) ppm.

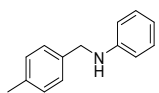

**N-(4-nitrobenzyl)aniline (18):** Isolated Yield: 198.5 mg (87%);  $^1\text{H}$  NMR ( $\text{CDCl}_3$ , 200 MHz, 298 K):  $\delta$  8.20-8.16 (d,  $^3J_{\text{H-H}}=8.84$  Hz, 2H, *ArH*), 7.55-7.51 (d,  $^3J_{\text{H-H}}=8.84$  Hz, 2H, *ArH*), 7.22-7.12 (m, 2H, *ArH*), 6.78-6.71 (t,  $^3J_{\text{H-H}}=7.0$  Hz, 1H, *ArH*), 6.60-6.56 (d,  $^3J_{\text{H-H}}=7.58$  Hz, 2H, *ArH*), 4.47 (s, 2H,  $\text{CH}_2$ ), 4.25 (s, 1H, *NH*) ppm;  $^{13}\text{C}\{^1\text{H}\}$  NMR ( $\text{CDCl}_3$ , 50.28 MHz, 298 K):  $\delta$  147.47, 147.29, 147.15, 129.35, 127.66, 123.85, 118.18, 112.88 (*Ph*), 47.58 ( $\text{CH}_2$ ) ppm.

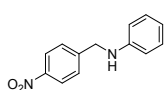

**N-benzyl-4-ethyl-aniline (19):** Isolated Yield: 186 mg (88%);  $^1\text{H}$  NMR ( $\text{CDCl}_3$ , 200 MHz, 298 K):  $\delta$  7.31-7.11 (m, 5H, *ArH*), 6.95-6.90 (d,  $^3J_{\text{H-H}}=8.46$  Hz, 2H, *ArH*), 6.51-6.47 (d,  $^3J_{\text{H-H}}=6.46$  Hz, 2H, *ArH*), 4.21 (s, 2H,  $\text{CH}_2$ ), 3.81 (s, 1H, *NH*), 2.51-2.39 (q,  $^3J_{\text{H-H}}=22.74$  Hz, 2H,  $\text{CH}_2\text{CH}_3$ ), 1.14-1.06 (t,  $^3J_{\text{H-H}}=15.16$  Hz, 3H,  $\text{CH}_2\text{CH}_3$ ) ppm;  $^{13}\text{C}\{^1\text{H}\}$  NMR ( $\text{CDCl}_3$ , 50.28 MHz, 298 K):  $\delta$  146.06, 139.61, 133.43, 128.55, 127.51, 127.13, 112.98 (*Ph*), 48.65 ( $\text{CH}_2\text{NH}$ ), 27.90 ( $\text{CH}_2\text{CH}_3$ ), 15.92 ( $\text{CH}_2\text{CH}_3$ ) ppm.

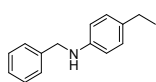

**N-(4-fluorobenzyl)aniline (20):** Isolated Yield: 152.9 mg (76%);  $^1\text{H}$  NMR ( $\text{CDCl}_3$ , 200 MHz, 298 K):  $\delta$  7.28-7.21 (m, 2H, *ArH*), 7.15-7.05 (m, 2H, *ArH*), 6.98-6.89 (m, 2H, *ArH*), 6.68-6.51 (m, 3H, *ArH*), 4.21 (s, 2H,  $\text{CH}_2$ ), 3.92 (s, 1H, *NH*) ppm;  $^{13}\text{C}\{^1\text{H}\}$  NMR ( $\text{CDCl}_3$ , 50.28 MHz, 298 K):  $\delta$  162.01 (d,  $J_{\text{C-F}}=245.17$  Hz, *ArC-F*), 147.90 (*Ph*), 135.10 (*Ph*), 129.25 (*Ph*), 128.96 (d,  $J_{\text{C-F}}=8.05$  Hz, *Ph*), 117.71, (*Ph*), 115.40 (d,  $J_{\text{C-F}}=21.22$  Hz, *Ar-C*), 112.85 (*Ph*), 47.57 ( $\text{CH}_2$ ) ppm.

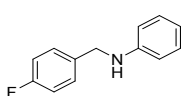

**N-benzyl-4-fluoroaniline (21):** Isolated Yield: 158.9 mg (79%);  $^1\text{H}$  NMR ( $\text{CDCl}_3$ , 200 MHz, 298 K):  $\delta$  7.36-7.23 (m, 5H, *ArH*), 6.91-6.82 (m, 2H, *ArH*), 6.58-6.51 (m, 2H, *ArH*), 4.27 (s, 2H,  $\text{CH}_2$ ), 3.92 (s, 1H, *NH*) ppm;  $^{13}\text{C}\{^1\text{H}\}$  NMR ( $\text{CDCl}_3$ , 50.28 MHz, 298 K):  $\delta$  155.85 (d,  $J_{\text{C-F}}=234.92$  Hz, *ArC-F*), 144.44 (*Ph*),

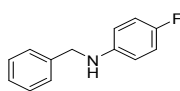

139.21 (*Ph*), 128.63 (*Ph*), 127.45 (*Ph*), 127.27 (*Ph*), 115.62 (d,  $J_{C-F}=22.32$  Hz, *Ph*), 113.61 (d,  $J_{C-F}=7.32$  Hz, *Ph*), 48.89 ( $CH_2$ ) ppm.

**4-((phenylamino)methyl)benzonitrile (22):**  $^1H$  NMR ( $CDCl_3$ , 200 MHz, 298 K):  $\delta$  7.55-

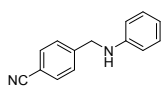

7.51 (d,  $^3J_{H-H}=8.46$  Hz, 2H, *ArH*), 7.41-7.37 (d,  $^3J_{H-H}=8.08$  Hz, 2H, *ArH*), 7.17-7.05 (q,  $^3J_{H-H}=6.46$  Hz, 2H, *ArH*), 6.69-6.62 (t,  $^3J_{H-H}=14.65$  Hz, 1H, *ArH*), 6.52-6.47 (d,  $^3J_{H-H}=7.71$  Hz, 2H, *ArH*), 4.34 (s, 2H,  $CH_2$ ), 4.14 (s, 1H, *NH*) ppm;  $^{13}C\{^1H\}$  NMR ( $CDCl_3$ , 50.28 MHz, 298 K):  $\delta$  147.35, 145.35, 132.37, 129.30, 127.64, 118.83, 118.03, 112.82, 110.83 (*Ph*), 47.71 ( $CH_2$ ) ppm.

**N-(4-fluorobenzyl)-2,4,6-trimethylaniline (23):** Isolated Yield: 126.5 mg (52%);  $^1H$  NMR

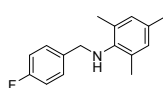

( $CDCl_3$ , 200 MHz, 298 K):  $\delta$  7.29-7.18 (m, 2H, *ArH*), 6.99-6.90 (m, 2H, *ArH*), 6.76 (s, 2H,  $CH_2$ ), 3.94 (s, 2H, *NH*), 2.95 (s, 1H,  $CH_3$ ) ppm.

### Details of the theoretical calculations

All the calculations in this study have been performed with density functional theory (DFT), with the aid of the Turbomole 6.4 suite of programs,<sup>[S3]</sup> using the PBE functional.<sup>[S4]</sup> The TZVP<sup>[S5]</sup> basis set has been employed. The resolution of identity (RI),<sup>[S6]</sup> along with the multiple accelerated resolution of identity (marij)<sup>[S7]</sup> approximations have been employed for an accurate and efficient treatment of the electronic Coulomb term in the DFT calculations. Dispersion correction (disp3) and solvent correction were incorporated with optimization calculations using the COSMO model,<sup>[S8]</sup> with dichloroethane ( $\epsilon = 10.36$ ) as the solvent. The values reported are  $\Delta G$  values, with zero point energy corrections, internal energy and entropic contributions included through frequency calculations on the optimized minima with the temperature taken to be 298.15 K. Harmonic frequency calculations were performed for all stationary points to confirm them as a local minima or transition state structures. The efficiency of a catalytic cycle, as well as the relative prominence of transition states, can be estimated using the *AUTO*F program, which is based on the energetic span model (ESM) defined by Shaik and co-workers.<sup>[S9-S11]</sup> According to this model, the TOF-determining transition state (TDTS) and intermediate (TDI) can be located from a catalytic cycle by the evaluation of the degree of TOF control ( $X_{TOF}$ ).<sup>56</sup> TOF can be calculated by the following equation:



$$\text{TOF} = \frac{K_B T}{h} e^{-\delta E/RT}$$

Where  $\delta E$ , the energetic span, can be defined as,

$$\delta E = T_{\text{TDS}} - T_{\text{TDI}} \quad \text{If TDS appears after TDI}$$

$$\delta E = T_{\text{TDS}} - T_{\text{TDI}} + \Delta G_r \quad \text{If TDS appears before TDI}$$

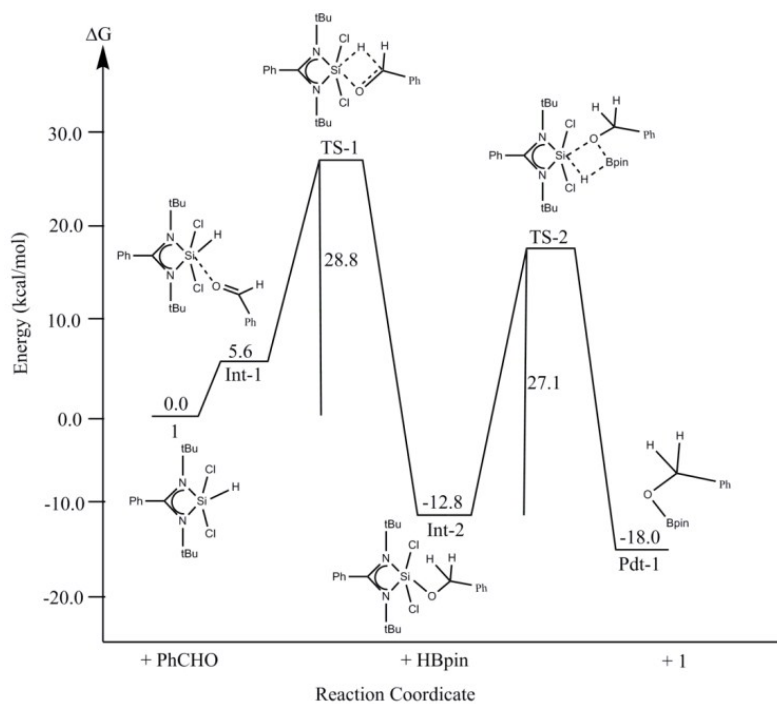

**Scheme S1.** The reaction energy profile diagram for the catalytic hydroboration of benzaldehyde by catalyst 1. The values (in kcal/mol) have been calculated at the PBE/TZVP level of theory with DFT.

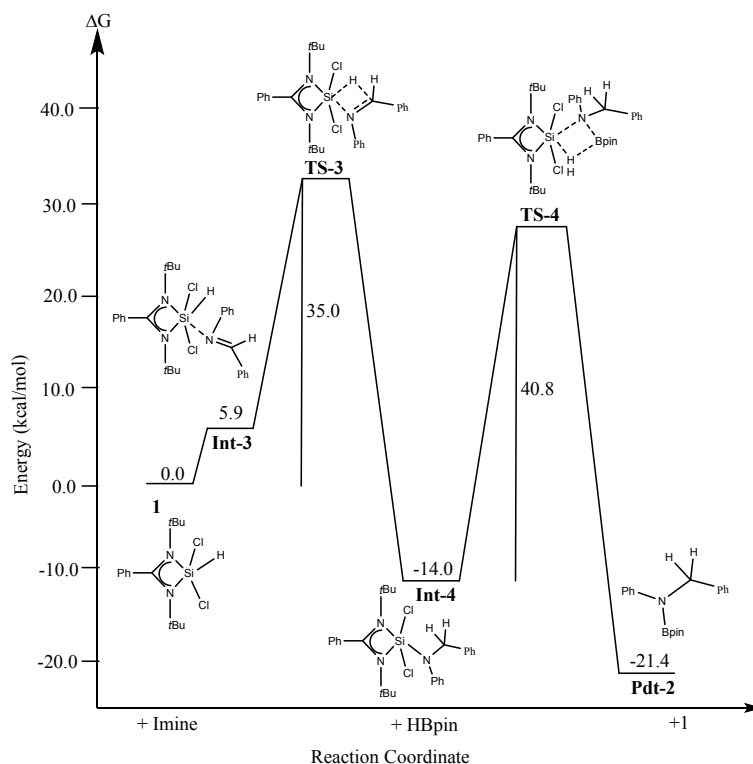

**Figure S1.** The reaction energy profile diagram for the catalytic imine hydroboration by catalyst **1**. The values (in kcal/mol) have been calculated at the PBE/TZVP level of theory with DFT.

### PBE/TZVP optimized geometries for all the compounds and transition states

**1**

PBE/TZVP Energy : -1195016.22 kcal/mol

|    |           |          |           |
|----|-----------|----------|-----------|
| Si | 8.313878  | 2.355217 | 10.541270 |
| Cl | 9.678086  | 0.609181 | 10.836864 |
| N  | 7.035584  | 3.852221 | 10.650120 |
| C  | 5.976721  | 4.430128 | 9.786181  |
| C  | 5.927036  | 3.578702 | 8.504227  |
| N  | 8.234040  | 3.023985 | 12.260302 |
| C  | 9.108244  | 2.930570 | 13.476744 |
| C  | 10.572745 | 3.098504 | 13.026721 |
| C  | 7.232577  | 3.911243 | 11.954918 |
| C  | 6.431431  | 4.693817 | 12.928371 |
| C  | 5.515114  | 4.021819 | 13.752427 |
| C  | 4.706960  | 4.746708 | 14.629605 |
| C  | 4.820180  | 6.139968 | 14.699853 |
| C  | 5.744157  | 6.807778 | 13.889179 |
| C  | 6.545956  | 6.088731 | 12.999581 |
| C  | 8.880443  | 1.562662 | 14.141720 |
| C  | 8.827704  | 4.032863 | 14.510817 |
| C  | 4.582487  | 4.409986 | 10.437445 |
| C  | 6.377870  | 5.869681 | 9.412555  |
| H  | 5.429582  | 2.935154 | 13.694127 |
| H  | 7.274389  | 6.608154 | 12.375450 |
| H  | 3.987821  | 4.221980 | 15.261016 |
| H  | 7.836649  | 1.473364 | 14.477915 |

|    |           |          |           |
|----|-----------|----------|-----------|
| H  | 9.535969  | 1.461154 | 15.018801 |
| H  | 9.098180  | 0.741778 | 13.447874 |
| H  | 5.841619  | 7.893331 | 13.947527 |
| H  | 4.189722  | 6.705115 | 15.388774 |
| H  | 4.332268  | 3.399977 | 10.793028 |
| H  | 3.836994  | 4.703182 | 9.684065  |
| H  | 4.502501  | 5.106829 | 11.280145 |
| H  | 6.379933  | 6.520754 | 10.296733 |
| H  | 5.660767  | 6.280767 | 8.686656  |
| H  | 7.380108  | 5.884128 | 8.961784  |
| H  | 8.935710  | 5.037851 | 14.080951 |
| H  | 9.575386  | 3.926912 | 15.309736 |
| H  | 7.835574  | 3.949079 | 14.968787 |
| H  | 10.873087 | 2.326379 | 12.310178 |
| H  | 11.233095 | 3.028390 | 13.903207 |
| H  | 10.717199 | 4.086138 | 12.564117 |
| H  | 6.911255  | 3.533793 | 8.017826  |
| H  | 5.216750  | 4.031605 | 7.798673  |
| H  | 5.590992  | 2.554167 | 8.716828  |
| H  | 7.260407  | 1.450395 | 10.001925 |
| Cl | 9.597032  | 3.346262 | 9.157777  |

### Int-1

PBE/TZVP Energy : -1411681.79 kcal/mol

|    |          |           |           |
|----|----------|-----------|-----------|
| Cl | 9.233732 | 0.279024  | 10.626981 |
| Si | 8.308831 | 2.297104  | 10.366138 |
| N  | 7.160807 | 3.912183  | 10.370761 |
| N  | 7.355878 | 2.414712  | 11.936119 |
| C  | 5.385981 | 3.990120  | 12.151143 |
| C  | 4.252952 | 3.160869  | 12.117542 |
| H  | 4.309598 | 2.192871  | 11.616898 |
| C  | 6.632989 | 3.502426  | 11.511684 |
| C  | 5.316586 | 5.246287  | 12.768333 |
| H  | 6.204322 | 5.878183  | 12.818839 |
| C  | 7.532687 | 1.871871  | 13.327520 |
| C  | 6.616376 | 4.827380  | 9.331538  |
| C  | 3.057484 | 3.593653  | 12.691937 |
| H  | 2.174876 | 2.952297  | 12.654391 |
| C  | 6.979120 | 0.440947  | 13.380187 |
| H  | 5.901060 | 0.437642  | 13.166636 |
| H  | 7.134118 | 0.016023  | 14.383290 |
| H  | 7.478805 | -0.203136 | 12.647728 |
| C  | 4.120405 | 5.668842  | 13.352901 |
| H  | 4.073169 | 6.643549  | 13.842142 |
| C  | 2.989992 | 4.845481  | 13.314728 |
| H  | 2.055880 | 5.179217  | 13.770497 |
| C  | 5.146265 | 4.523016  | 8.995906  |
| H  | 5.013706 | 3.458488  | 8.756318  |
| H  | 4.845596 | 5.120335  | 8.122314  |
| H  | 4.475065 | 4.778286  | 9.825608  |
| C  | 6.776042 | 6.284996  | 9.799335  |
| H  | 6.125157 | 6.504460  | 10.654837 |
| H  | 6.500342 | 6.965782  | 8.980618  |

|    |           |           |           |
|----|-----------|-----------|-----------|
| H  | 7.817765  | 6.487935  | 10.086429 |
| C  | 6.824422  | 2.723930  | 14.392687 |
| H  | 7.150936  | 3.772396  | 14.359722 |
| H  | 7.100710  | 2.316714  | 15.375495 |
| H  | 5.732259  | 2.690406  | 14.311272 |
| C  | 9.037019  | 1.894901  | 13.661022 |
| H  | 9.619699  | 1.272273  | 12.972878 |
| H  | 9.187758  | 1.510088  | 14.679998 |
| H  | 9.423557  | 2.923910  | 13.619909 |
| C  | 7.469606  | 4.624688  | 8.066547  |
| H  | 8.534073  | 4.798192  | 8.275494  |
| H  | 7.146613  | 5.338652  | 7.296467  |
| H  | 7.351600  | 3.611374  | 7.657729  |
| H  | 7.693587  | 1.848961  | 9.085569  |
| C  | 3.795671  | -0.833669 | 11.385999 |
| C  | 4.956273  | -0.938375 | 10.595737 |
| C  | 5.882756  | -1.966860 | 10.840864 |
| C  | 5.658581  | -2.877504 | 11.874560 |
| C  | 4.505690  | -2.765349 | 12.660484 |
| C  | 3.572458  | -1.745687 | 12.413958 |
| H  | 3.080019  | -0.035933 | 11.175598 |
| H  | 6.786611  | -2.031672 | 10.230293 |
| H  | 6.381490  | -3.670706 | 12.072527 |
| H  | 4.329465  | -3.476456 | 13.470036 |
| H  | 2.673838  | -1.669569 | 13.028925 |
| C  | 5.238003  | 0.029079  | 9.521746  |
| H  | 6.163521  | -0.181841 | 8.934598  |
| O  | 4.547717  | 1.012112  | 9.260576  |
| Cl | 10.148926 | 3.355948  | 10.246964 |

### TS-1

PBE/TZVP Energy : -1411661.75 kcal/mol

|    |           |           |           |
|----|-----------|-----------|-----------|
| C  | 7.681667  | -3.066554 | 9.702787  |
| C  | 7.630406  | -1.779453 | 10.232665 |
| C  | 6.776871  | -0.820864 | 9.652432  |
| C  | 5.984660  | -1.161198 | 8.537334  |
| C  | 6.044302  | -2.448431 | 8.009651  |
| C  | 6.892886  | -3.400052 | 8.592808  |
| C  | 6.693682  | 0.527104  | 10.200551 |
| O  | 7.225068  | 0.831596  | 11.358761 |
| Si | 8.249559  | 2.266885  | 10.579298 |
| Cl | 9.966702  | 0.881176  | 10.618299 |
| N  | 6.757416  | 3.452851  | 10.762236 |
| C  | 5.807788  | 4.164119  | 9.853288  |
| C  | 5.937960  | 3.556755  | 8.445419  |
| N  | 8.332309  | 3.177317  | 12.245320 |
| C  | 9.109934  | 2.982593  | 13.501936 |
| C  | 10.589674 | 3.242617  | 13.162681 |
| C  | 7.185682  | 3.824805  | 11.982775 |
| C  | 6.470231  | 4.763811  | 12.886940 |
| C  | 5.355162  | 4.300727  | 13.600116 |
| C  | 4.680486  | 5.157450  | 14.473062 |
| C  | 5.108039  | 6.480460  | 14.627183 |
| C  | 6.215155  | 6.945098  | 13.908578 |

|    |           |           |           |
|----|-----------|-----------|-----------|
| C  | 6.899377  | 6.088974  | 13.043590 |
| C  | 8.905117  | 1.534515  | 13.986630 |
| C  | 8.716600  | 3.932557  | 14.642770 |
| C  | 4.360358  | 3.972125  | 10.339144 |
| C  | 6.147054  | 5.662850  | 9.748387  |
| H  | 5.027869  | 3.266276  | 13.479677 |
| H  | 7.768627  | 6.446936  | 12.488858 |
| H  | 3.818753  | 4.789480  | 15.033076 |
| H  | 7.846973  | 1.358059  | 14.228779 |
| H  | 9.504861  | 1.364108  | 14.892784 |
| H  | 9.209018  | 0.808870  | 13.223210 |
| H  | 6.550542  | 7.977337  | 14.024278 |
| H  | 4.578304  | 7.149784  | 15.307837 |
| H  | 4.126576  | 2.903327  | 10.452989 |
| H  | 3.665103  | 4.401710  | 9.602841  |
| H  | 4.187831  | 4.469810  | 11.301612 |
| H  | 5.955683  | 6.191295  | 10.689472 |
| H  | 5.521715  | 6.125343  | 8.970834  |
| H  | 7.202667  | 5.794578  | 9.473241  |
| H  | 8.859518  | 4.986139  | 14.371886 |
| H  | 9.375872  | 3.711310  | 15.494359 |
| H  | 7.680421  | 3.791416  | 14.974000 |
| H  | 10.944612 | 2.573606  | 12.370157 |
| H  | 11.205959 | 3.079549  | 14.058663 |
| H  | 10.725047 | 4.281380  | 12.828592 |
| H  | 6.967670  | 3.628518  | 8.071944  |
| H  | 5.281915  | 4.112927  | 7.761658  |
| H  | 5.621706  | 2.505190  | 8.414135  |
| H  | 7.706133  | 1.500637  | 9.267027  |
| H  | 8.239463  | -1.491417 | 11.089726 |
| H  | 5.324116  | -0.411747 | 8.093745  |
| H  | 5.431398  | -2.716396 | 7.147492  |
| H  | 6.938419  | -4.409558 | 8.179240  |
| H  | 8.337423  | -3.815630 | 10.149843 |
| H  | 5.858876  | 1.144575  | 9.825035  |
| Cl | 9.415980  | 3.765097  | 9.393201  |

## Int-2

PBE/TZVP Energy : -1411705.73 kcal/mol

|    |           |           |           |
|----|-----------|-----------|-----------|
| C  | 0.454475  | -4.104541 | 2.398250  |
| C  | 0.505991  | -3.562283 | 1.112061  |
| C  | -0.587585 | -3.685724 | 0.239529  |
| C  | -1.732198 | -4.364793 | 0.678844  |
| C  | -1.786541 | -4.913831 | 1.965503  |
| C  | -0.693514 | -4.783161 | 2.828334  |
| C  | -0.532223 | -3.075472 | -1.139508 |
| O  | -0.660113 | -1.646093 | -1.054199 |
| Si | 0.347821  | -0.364697 | -1.431879 |
| Cl | 2.167917  | -1.561546 | -1.866332 |
| N  | -1.003084 | 0.892559  | -0.860644 |
| C  | -2.430427 | 1.193708  | -1.152524 |
| C  | -2.954563 | 0.109808  | -2.110264 |
| N  | 1.038728  | 0.796771  | -0.137727 |
| C  | 2.364604  | 1.028101  | 0.520737  |

|    |           |           |           |
|----|-----------|-----------|-----------|
| C  | 3.379396  | 1.452694  | -0.556459 |
| C  | -0.131776 | 1.497438  | -0.069052 |
| C  | -0.373955 | 2.753108  | 0.689547  |
| C  | -0.888849 | 2.725121  | 1.992400  |
| C  | -1.111665 | 3.921546  | 2.678088  |
| C  | -0.822596 | 5.146364  | 2.067075  |
| C  | -0.310485 | 5.174306  | 0.765132  |
| C  | -0.086039 | 3.981203  | 0.075122  |
| C  | 2.791931  | -0.280211 | 1.214016  |
| C  | 2.336451  | 2.114296  | 1.608674  |
| C  | -3.266121 | 1.138958  | 0.139703  |
| C  | -2.572008 | 2.566789  | -1.834676 |
| H  | -1.105581 | 1.768874  | 2.472069  |
| H  | 0.317613  | 3.999396  | -0.939038 |
| H  | -1.511249 | 3.895445  | 3.693391  |
| H  | 2.052729  | -0.560934 | 1.978685  |
| H  | 3.762745  | -0.130741 | 1.708701  |
| H  | 2.895246  | -1.106106 | 0.502835  |
| H  | -0.083530 | 6.127270  | 0.283858  |
| H  | -0.996596 | 6.079987  | 2.605305  |
| H  | -3.105450 | 0.182714  | 0.658143  |
| H  | -4.333107 | 1.222210  | -0.113966 |
| H  | -3.016253 | 1.959536  | 0.822881  |
| H  | -2.295624 | 3.386968  | -1.160627 |
| H  | -3.618215 | 2.715836  | -2.140067 |
| H  | -1.937229 | 2.614908  | -2.730617 |
| H  | 2.113081  | 3.111865  | 1.214005  |
| H  | 3.340321  | 2.148080  | 2.055223  |
| H  | 1.621641  | 1.880486  | 2.407793  |
| H  | 3.467691  | 0.696827  | -1.345907 |
| H  | 4.369937  | 1.594397  | -0.099685 |
| H  | 3.069598  | 2.404246  | -1.013607 |
| H  | -2.392012 | 0.104663  | -3.052846 |
| H  | -4.008614 | 0.321708  | -2.338472 |
| H  | -2.880576 | -0.884290 | -1.653181 |
| H  | 0.404645  | -3.351530 | -1.645661 |
| H  | 1.402744  | -3.038096 | 0.774448  |
| H  | -2.589073 | -4.464096 | 0.007354  |
| H  | -2.683637 | -5.442705 | 2.294425  |
| H  | -0.733928 | -5.209444 | 3.832871  |
| H  | 1.312570  | -4.004226 | 3.066365  |
| H  | -1.376867 | -3.434737 | -1.747745 |
| Cl | 0.357823  | 0.470448  | -3.420887 |

## TS-2

PBE/TZVP Energy : -1669905.89 kcal/mol

|   |           |          |           |
|---|-----------|----------|-----------|
| C | -1.964443 | 1.180150 | 1.607956  |
| C | -0.991498 | 1.683044 | 0.732869  |
| C | -0.759414 | 3.063168 | 0.660431  |
| C | -1.495503 | 3.935293 | 1.463277  |
| C | -2.467634 | 3.435122 | 2.337798  |
| C | -2.700986 | 2.057957 | 2.407383  |
| C | -0.242898 | 0.711119 | -0.109249 |
| N | 0.858861  | 0.008993 | 0.259215  |

|    |           |           |           |
|----|-----------|-----------|-----------|
| C  | 1.882850  | 0.275648  | 1.318293  |
| C  | 3.200408  | 0.675358  | 0.626702  |
| Si | 0.801422  | -1.016568 | -1.322966 |
| Cl | 2.458281  | -2.433524 | -1.004311 |
| O  | -0.471674 | -2.345195 | -0.633619 |
| B  | -0.529674 | -3.147229 | -2.298916 |
| O  | -1.810409 | -3.160479 | -2.802834 |
| C  | -1.832554 | -4.313970 | -3.731361 |
| C  | -3.235879 | -4.898543 | -3.722190 |
| C  | -0.498260 | -3.106475 | 0.584514  |
| C  | -1.728317 | -2.775823 | 1.397126  |
| C  | -2.994026 | -2.779096 | 0.789786  |
| C  | -4.134770 | -2.444793 | 1.521937  |
| C  | -4.027518 | -2.111040 | 2.878348  |
| C  | -2.773698 | -2.121957 | 3.496288  |
| C  | -1.631262 | -2.451110 | 2.756964  |
| O  | 0.224958  | -4.270317 | -2.521971 |
| C  | -0.724387 | -5.250094 | -3.114422 |
| C  | -1.240132 | -6.113782 | -1.964454 |
| C  | 0.034311  | -6.091621 | -4.126981 |
| N  | -0.616555 | 0.291935  | -1.316020 |
| C  | -1.802324 | 0.642272  | -2.144811 |
| C  | -1.494369 | 0.216602  | -3.592242 |
| Cl | 2.000674  | 0.205945  | -2.718724 |
| C  | -3.047851 | -0.108500 | -1.643911 |
| C  | -2.070997 | 2.158350  | -2.154642 |
| C  | 2.086085  | -0.999033 | 2.155088  |
| C  | 1.496725  | 1.402071  | 2.289689  |
| C  | -1.471634 | -3.782127 | -5.118280 |
| H  | -2.135262 | 0.103737  | 1.668611  |
| H  | -0.004424 | 3.452549  | -0.024930 |
| H  | -3.457005 | 1.661491  | 3.088245  |
| H  | 1.163995  | -1.245894 | 2.699903  |
| H  | 2.882181  | -0.827713 | 2.893773  |
| H  | 2.376397  | -1.851357 | 1.530133  |
| H  | -1.310658 | 5.009593  | 1.405616  |
| H  | -3.042795 | 4.119574  | 2.964425  |
| H  | -2.887901 | -1.191444 | -1.692306 |
| H  | -3.910368 | 0.147937  | -2.277566 |
| H  | -3.285184 | 0.168586  | -0.607835 |
| H  | -2.471348 | 2.520049  | -1.201412 |
| H  | -2.815380 | 2.373890  | -2.934562 |
| H  | -1.153976 | 2.717886  | -2.389818 |
| H  | 1.429575  | 2.377465  | 1.794130  |
| H  | 2.290930  | 1.465746  | 3.047153  |
| H  | 0.549910  | 1.202888  | 2.807930  |
| H  | 3.560652  | -0.118200 | -0.038945 |
| H  | 3.970241  | 0.868654  | 1.388352  |
| H  | 3.058789  | 1.588251  | 0.031089  |
| H  | -0.586361 | 0.711205  | -3.961844 |
| H  | -2.339404 | 0.505048  | -4.233592 |
| H  | -1.371001 | -0.869116 | -3.677096 |
| H  | 0.414844  | -2.905756 | 1.160784  |
| H  | -0.652777 | -2.446519 | 3.243148  |
| H  | -3.075098 | -3.022706 | -0.271978 |

|   |           |           |           |
|---|-----------|-----------|-----------|
| H | -5.111702 | -2.440593 | 1.033559  |
| H | -4.918626 | -1.842684 | 3.449346  |
| H | -2.680259 | -1.860618 | 4.552366  |
| H | -0.484090 | -4.176463 | 0.316687  |
| H | 0.195718  | -1.843652 | -2.534203 |
| H | -0.455462 | -3.362795 | -5.137920 |
| H | -1.537838 | -4.575330 | -5.875780 |
| H | -2.179603 | -2.986808 | -5.388431 |
| H | -0.655514 | -6.770426 | -4.649585 |
| H | 0.543779  | -5.467150 | -4.870692 |
| H | 0.787454  | -6.702259 | -3.610035 |
| H | -3.939456 | -4.174792 | -4.156370 |
| H | -3.270289 | -5.815695 | -4.327457 |
| H | -0.383782 | -6.565699 | -1.445875 |
| H | -3.567583 | -5.136066 | -2.704030 |
| H | -1.886099 | -6.921490 | -2.335648 |
| H | -1.812505 | -5.519579 | -1.237620 |

### Pdt-1

PBE/TZVP Energy : -1669933.62 kcal/mol

|    |           |           |           |
|----|-----------|-----------|-----------|
| C  | -1.217915 | 3.314643  | -0.156591 |
| C  | 0.010036  | 3.195638  | -0.825829 |
| C  | 0.496472  | 4.264658  | -1.592600 |
| C  | -0.236690 | 5.449571  | -1.680912 |
| C  | -1.464497 | 5.566135  | -1.019683 |
| C  | -1.954570 | 4.495961  | -0.263247 |
| C  | 0.783065  | 1.933668  | -0.711915 |
| N  | 1.376087  | 1.466335  | 0.431438  |
| C  | 1.868798  | 2.210282  | 1.638515  |
| C  | 3.366501  | 1.894963  | 1.817067  |
| Si | 1.672587  | -0.208738 | -0.282184 |
| Cl | 2.231845  | -1.341594 | 1.565918  |
| O  | -1.915508 | -1.670395 | 0.245034  |
| B  | -1.335421 | -2.903660 | 0.092219  |
| O  | -1.188551 | -3.461588 | -1.166103 |
| C  | -0.335194 | -4.648857 | -0.984130 |
| C  | -0.791854 | -5.724195 | -1.959949 |
| C  | -1.980119 | -1.095589 | 1.557875  |
| C  | -2.833652 | 0.149339  | 1.555337  |
| C  | -3.684340 | 0.464045  | 0.488069  |
| C  | -4.480970 | 1.614176  | 0.532596  |
| C  | -4.437892 | 2.460865  | 1.644306  |
| C  | -3.587551 | 2.152880  | 2.713475  |
| C  | -2.791364 | 1.005611  | 2.667665  |
| O  | -0.870055 | -3.689415 | 1.129220  |
| C  | -0.560366 | -5.003145 | 0.539230  |
| C  | -1.783508 | -5.890867 | 0.775560  |
| C  | 0.662688  | -5.569356 | 1.246812  |
| N  | 0.936895  | 1.007327  | -1.646819 |
| C  | 0.154550  | 0.771637  | -2.892323 |
| C  | 0.652944  | -0.560553 | -3.478965 |
| Cl | 3.521849  | -0.537145 | -1.275869 |
| C  | -1.347069 | 0.651411  | -2.576207 |
| C  | 0.406758  | 1.884641  | -3.922905 |



|   |           |           |           |
|---|-----------|-----------|-----------|
| C | 1.053241  | 1.753599  | 2.858972  |
| C | 1.743987  | 3.735869  | 1.499387  |
| C | 1.101438  | -4.221903 | -1.290620 |
| H | -1.599472 | 2.482649  | 0.437796  |
| H | 1.458377  | 4.175258  | -2.100276 |
| H | -2.913244 | 4.576287  | 0.251145  |
| H | -0.008256 | 2.004895  | 2.719969  |
| H | 1.414897  | 2.263771  | 3.763835  |
| H | 1.141172  | 0.670556  | 3.011214  |
| H | 0.152243  | 6.283158  | -2.268463 |
| H | -2.039033 | 6.491466  | -1.093321 |
| H | -1.522278 | -0.123068 | -1.815956 |
| H | -1.894925 | 0.373516  | -3.489116 |
| H | -1.758781 | 1.600614  | -2.208139 |
| H | -0.029446 | 2.839851  | -3.606413 |
| H | -0.054912 | 1.601664  | -4.880433 |
| H | 1.485178  | 2.024784  | -4.086053 |
| H | 2.264519  | 4.110030  | 0.607174  |
| H | 2.223101  | 4.185099  | 2.380690  |
| H | 0.703763  | 4.079426  | 1.472067  |
| H | 3.546267  | 0.823661  | 1.960011  |
| H | 3.746159  | 2.426616  | 2.701638  |
| H | 3.935065  | 2.235529  | 0.939101  |
| H | 1.732011  | -0.523793 | -3.681020 |
| H | 0.126894  | -0.758848 | -4.423338 |
| H | 0.448426  | -1.399385 | -2.799047 |
| H | -0.960365 | -0.850115 | 1.902534  |
| H | -2.127752 | 0.772152  | 3.504392  |
| H | -3.711410 | -0.190607 | -0.383166 |
| H | -5.133606 | 1.851610  | -0.310259 |
| H | -5.058136 | 3.358857  | 1.677315  |
| H | -3.539068 | 2.811436  | 3.583065  |
| H | -2.393655 | -1.831118 | 2.269702  |
| H | 0.576235  | -1.179574 | -0.534028 |
| H | 1.453713  | -3.459263 | -0.582284 |
| H | 1.786952  | -5.079669 | -1.249450 |
| H | 1.139681  | -3.798452 | -2.303908 |
| H | 0.984069  | -6.506328 | 0.769282  |
| H | 1.498207  | -4.858857 | 1.231462  |
| H | 0.413558  | -5.788677 | 2.294719  |
| H | -0.598691 | -5.392390 | -2.989875 |
| H | -0.232951 | -6.656344 | -1.792452 |
| H | -1.990264 | -5.931405 | 1.853960  |
| H | -1.863915 | -5.933442 | -1.859045 |
| H | -1.607560 | -6.915024 | 0.418294  |
| H | -2.672846 | -5.490117 | 0.268534  |

### Int-3

PBE/TZVP Energy : -1544056.66 kcal/mol

|   |           |           |          |
|---|-----------|-----------|----------|
| C | 1.284287  | -1.288436 | 3.611502 |
| C | 0.161565  | -0.569299 | 3.186582 |
| C | -0.195734 | -0.554846 | 1.836325 |
| C | 0.573139  | -1.267578 | 0.910357 |
| C | 1.702540  | -1.984433 | 1.326565 |

|    |           |           |           |
|----|-----------|-----------|-----------|
| C  | 2.052342  | -1.993094 | 2.677569  |
| N  | 0.227488  | -1.260872 | -0.477078 |
| Si | 0.616427  | 0.372607  | -1.802039 |
| Cl | 0.905176  | 1.972862  | -3.393408 |
| Cl | 2.662565  | -0.519128 | -2.118010 |
| N  | -0.955854 | 1.248814  | -1.124370 |
| C  | -0.231583 | 2.028019  | -0.311986 |
| C  | -0.748917 | 3.229158  | 0.400621  |
| C  | -1.303318 | 3.153680  | 1.684226  |
| C  | -1.774835 | 4.309574  | 2.311884  |
| C  | -1.696946 | 5.544811  | 1.660613  |
| C  | -1.145703 | 5.622173  | 0.376437  |
| C  | -0.673322 | 4.469322  | -0.253065 |
| N  | 1.043127  | 1.600354  | -0.356311 |
| C  | 2.278854  | 2.187163  | 0.252781  |
| C  | 2.002012  | 3.195306  | 1.382774  |
| C  | -2.391596 | 1.310639  | -1.497396 |
| C  | -2.747288 | 2.655888  | -2.159635 |
| C  | -2.648552 | 0.189560  | -2.518054 |
| C  | -3.287577 | 1.063414  | -0.270966 |
| C  | 3.090253  | 2.889405  | -0.851336 |
| C  | 3.110794  | 1.057873  | 0.886067  |
| C  | -0.255015 | -2.317910 | -1.049138 |
| C  | -0.663061 | -3.617233 | -0.519935 |
| C  | -0.935936 | -3.914517 | 0.834171  |
| C  | -1.334907 | -5.197717 | 1.200533  |
| C  | -1.460452 | -6.206990 | 0.236631  |
| C  | -1.207871 | -5.923119 | -1.109519 |
| C  | -0.829298 | -4.635728 | -1.485474 |
| H  | -1.351544 | 2.195692  | 2.203597  |
| H  | -0.239105 | 4.523279  | -1.253473 |
| H  | -2.200329 | 4.243526  | 3.314801  |
| H  | 2.583789  | 0.632843  | 1.750067  |
| H  | 4.066605  | 1.474615  | 1.236541  |
| H  | 3.321638  | 0.256219  | 0.172059  |
| H  | -1.081313 | 6.583394  | -0.136901 |
| H  | -2.064428 | 6.446932  | 2.153658  |
| H  | -3.053585 | 0.092646  | 0.191468  |
| H  | -4.342609 | 1.046427  | -0.582217 |
| H  | -3.170474 | 1.851941  | 0.482914  |
| H  | -2.720186 | 3.483904  | -1.440713 |
| H  | -3.764342 | 2.602244  | -2.575622 |
| H  | -2.042234 | 2.873671  | -2.973890 |
| H  | 1.542139  | 4.125352  | 1.032053  |
| H  | 2.972182  | 3.450132  | 1.833396  |
| H  | 1.370573  | 2.760565  | 2.169637  |
| H  | 3.367131  | 2.184426  | -1.644678 |
| H  | 4.007952  | 3.314146  | -0.417315 |
| H  | 2.505231  | 3.701834  | -1.304617 |
| H  | -2.050519 | 0.332620  | -3.428040 |
| H  | -3.711570 | 0.196940  | -2.796581 |
| H  | -2.416000 | -0.797799 | -2.095476 |
| H  | 0.010024  | -0.530703 | -2.825728 |
| H  | -0.849224 | -3.144641 | 1.597794  |
| H  | -0.645707 | -4.407954 | -2.538217 |

|   |           |           |           |
|---|-----------|-----------|-----------|
| H | -1.315660 | -6.701834 | -1.866381 |
| H | -1.763954 | -7.211917 | 0.536415  |
| H | -1.549702 | -5.414141 | 2.248581  |
| H | -0.368952 | -2.214313 | -2.136417 |
| H | -1.080647 | -0.018831 | 1.494460  |
| H | 2.300413  | -2.519048 | 0.587104  |
| H | -0.444446 | -0.020270 | 3.910148  |
| H | 2.933884  | -2.550193 | 3.000126  |
| H | 1.561291  | -1.297573 | 4.667088  |

### TS-3

PBE/TZVP Energy : -1544024.87 kcal/mol

|    |           |           |           |
|----|-----------|-----------|-----------|
| C  | 7.496506  | -3.209226 | 9.584067  |
| C  | 7.531709  | -1.904399 | 10.065689 |
| C  | 6.587501  | -0.958644 | 9.610648  |
| C  | 5.635776  | -1.340303 | 8.641218  |
| C  | 5.599955  | -2.650200 | 8.167688  |
| C  | 6.528671  | -3.586222 | 8.640800  |
| C  | 6.621468  | 0.427431  | 10.057985 |
| Si | 8.206504  | 2.296145  | 10.555340 |
| Cl | 9.994854  | 0.978468  | 10.465715 |
| N  | 6.768771  | 3.575149  | 10.868134 |
| C  | 5.456972  | 3.939531  | 10.271776 |
| C  | 5.548116  | 3.654696  | 8.761263  |
| N  | 8.511178  | 3.288498  | 12.154551 |
| C  | 9.703848  | 3.618275  | 13.007254 |
| C  | 10.782500 | 4.257877  | 12.114027 |
| C  | 7.354502  | 3.977267  | 11.994825 |
| C  | 6.767648  | 4.958995  | 12.946618 |
| C  | 5.929241  | 4.489073  | 13.966482 |
| C  | 5.338584  | 5.392070  | 14.855068 |
| C  | 5.586134  | 6.762713  | 14.729202 |
| C  | 6.427221  | 7.230905  | 13.712480 |
| C  | 7.015686  | 6.333048  | 12.821532 |
| C  | 10.254890 | 2.332428  | 13.643343 |
| C  | 9.399369  | 4.578444  | 14.169565 |
| C  | 4.328931  | 3.110924  | 10.915153 |
| C  | 5.120539  | 5.436698  | 10.417165 |
| H  | 5.747411  | 3.416908  | 14.066756 |
| H  | 7.666620  | 6.695934  | 12.023959 |
| H  | 4.685895  | 5.022319  | 15.648140 |
| H  | 9.521725  | 1.904398  | 14.340417 |
| H  | 11.164889 | 2.578028  | 14.209510 |
| H  | 10.516471 | 1.584861  | 12.886810 |
| H  | 6.624241  | 8.299867  | 13.612327 |
| H  | 5.124534  | 7.467346  | 15.423679 |
| H  | 4.498973  | 2.032547  | 10.799907 |
| H  | 3.366582  | 3.356885  | 10.442509 |
| H  | 4.252278  | 3.330821  | 11.989075 |
| H  | 4.851397  | 5.711428  | 11.442417 |
| H  | 4.257749  | 5.660016  | 9.772883  |
| H  | 5.963378  | 6.061716  | 10.090669 |
| H  | 9.158231  | 5.592766  | 13.835193 |
| H  | 10.307305 | 4.638648  | 14.786662 |

|    |           |           |           |
|----|-----------|-----------|-----------|
| H  | 8.581744  | 4.213452  | 14.805387 |
| H  | 11.089149 | 3.575147  | 11.311336 |
| H  | 11.665002 | 4.503256  | 12.723971 |
| H  | 10.406264 | 5.181027  | 11.651034 |
| H  | 6.329807  | 4.273684  | 8.301410  |
| H  | 4.583133  | 3.885779  | 8.289441  |
| H  | 5.786675  | 2.606741  | 8.538442  |
| H  | 7.647737  | 1.503281  | 9.250784  |
| H  | 8.290765  | -1.596214 | 10.785152 |
| H  | 4.921287  | -0.600785 | 8.270697  |
| H  | 4.854935  | -2.943787 | 7.426221  |
| H  | 6.505476  | -4.611561 | 8.266398  |
| H  | 8.227347  | -3.939458 | 9.935886  |
| H  | 5.877868  | 1.067059  | 9.568117  |
| Cl | 9.153598  | 3.775524  | 9.106204  |
| N  | 7.196409  | 0.820926  | 11.243175 |
| C  | 6.933718  | 0.134504  | 12.439723 |
| C  | 5.618891  | -0.273070 | 12.747567 |
| C  | 7.965203  | -0.163234 | 13.347651 |
| C  | 5.349424  | -0.964336 | 13.929390 |
| H  | 4.808038  | -0.030122 | 12.057821 |
| C  | 7.686843  | -0.838168 | 14.535157 |
| H  | 8.985541  | 0.105542  | 13.086643 |
| C  | 6.379488  | -1.243916 | 14.834603 |
| H  | 4.325414  | -1.272317 | 14.151690 |
| H  | 8.501583  | -1.067369 | 15.225771 |
| H  | 6.166933  | -1.775514 | 15.763976 |

#### Int-4

PBE/TZVP Energy : -1544077.59 kcal/mol

|    |           |           |           |
|----|-----------|-----------|-----------|
| C  | 1.574105  | -5.248630 | 0.349526  |
| C  | 1.069393  | -4.022160 | -0.091094 |
| C  | -0.114570 | -3.967248 | -0.839192 |
| C  | -0.786096 | -5.161882 | -1.134772 |
| C  | -0.281357 | -6.391470 | -0.699143 |
| C  | 0.901430  | -6.438318 | 0.046501  |
| C  | -0.654324 | -2.648770 | -1.361446 |
| Si | 0.249410  | -0.014082 | -1.214157 |
| Cl | 2.054677  | -1.021854 | -2.048667 |
| N  | -1.062904 | 1.235945  | -0.462635 |
| C  | -2.533291 | 1.479475  | -0.526165 |
| C  | -3.193004 | 0.235360  | -1.146191 |
| N  | 1.095112  | 1.361539  | -0.277376 |
| C  | 2.509844  | 1.737206  | 0.058786  |
| C  | 3.227315  | 2.159461  | -1.235499 |
| C  | -0.084634 | 2.010101  | -0.028092 |
| C  | -0.236337 | 3.355769  | 0.581195  |
| C  | -0.511601 | 3.490964  | 1.948475  |
| C  | -0.647565 | 4.763402  | 2.507089  |
| C  | -0.517989 | 5.901241  | 1.703325  |
| C  | -0.250076 | 5.765373  | 0.336795  |
| C  | -0.106040 | 4.495536  | -0.225982 |
| C  | 3.195260  | 0.522231  | 0.715516  |
| C  | 2.614914  | 2.889802  | 1.071739  |
| C  | -3.116181 | 1.672144  | 0.886312  |

|    |           |           |           |
|----|-----------|-----------|-----------|
| C  | -2.845696 | 2.700933  | -1.409518 |
| H  | -0.609138 | 2.602188  | 2.574182  |
| H  | 0.110149  | 4.385926  | -1.290394 |
| H  | -0.856050 | 4.865250  | 3.573615  |
| H  | 2.727081  | 0.294999  | 1.685028  |
| H  | 4.251892  | 0.763331  | 0.900902  |
| H  | 3.153599  | -0.371539 | 0.085388  |
| H  | -0.149434 | 6.650147  | -0.294153 |
| H  | -0.625687 | 6.894880  | 2.142349  |
| H  | -2.816784 | 0.843980  | 1.543852  |
| H  | -4.213733 | 1.687904  | 0.821418  |
| H  | -2.792108 | 2.617833  | 1.336725  |
| H  | -2.470642 | 3.630183  | -0.962638 |
| H  | -3.935392 | 2.796485  | -1.525418 |
| H  | -2.398160 | 2.579526  | -2.405712 |
| H  | 2.260906  | 3.847357  | 0.675083  |
| H  | 3.679718  | 3.002656  | 1.319881  |
| H  | 2.076236  | 2.670504  | 2.003199  |
| H  | 3.222142  | 1.352256  | -1.977606 |
| H  | 4.272267  | 2.422862  | -1.014301 |
| H  | 2.733501  | 3.041198  | -1.669887 |
| H  | -2.818545 | 0.037877  | -2.158011 |
| H  | -4.276053 | 0.409510  | -1.210330 |
| H  | -3.028278 | -0.650908 | -0.521547 |
| H  | -0.177972 | -2.433870 | -2.329572 |
| H  | 1.590403  | -3.092823 | 0.145635  |
| H  | -1.718458 | -5.128548 | -1.705995 |
| H  | -0.817691 | -7.313332 | -0.934843 |
| H  | 1.294265  | -7.396157 | 0.394049  |
| H  | 2.497100  | -5.276438 | 0.933201  |
| H  | -1.733007 | -2.749908 | -1.578115 |
| Cl | -0.398512 | 0.492286  | -3.207464 |
| N  | -0.406983 | -1.499747 | -0.480434 |
| C  | -0.948899 | -1.544326 | 0.818681  |
| C  | -2.032098 | -2.386451 | 1.150955  |
| C  | -0.393037 | -0.756723 | 1.848219  |
| C  | -2.558936 | -2.394638 | 2.444933  |
| H  | -2.473483 | -3.039249 | 0.398804  |
| C  | -0.932837 | -0.758726 | 3.133333  |
| H  | 0.486826  | -0.148876 | 1.635294  |
| C  | -2.027331 | -1.574173 | 3.444698  |
| H  | -3.401608 | -3.052860 | 2.668278  |
| H  | -0.480061 | -0.130500 | 3.904100  |
| H  | -2.445063 | -1.583740 | 4.452862  |

#### TS-4

PBE/TZVP Energy : -1802264.03 kcal/mol

|   |           |           |           |
|---|-----------|-----------|-----------|
| C | -1.548922 | -1.100109 | 1.257421  |
| C | -1.562816 | -1.653915 | -0.033502 |
| C | -2.786218 | -1.749714 | -0.709406 |
| C | -3.964356 | -1.285021 | -0.117556 |
| C | -3.939210 | -0.713847 | 1.157911  |
| C | -2.722830 | -0.624280 | 1.844107  |
| N | -0.357739 | -2.228710 | -0.607290 |

|    |           |           |           |
|----|-----------|-----------|-----------|
| C  | 0.149008  | -3.352772 | 0.252865  |
| C  | -0.916044 | -4.197319 | 0.921391  |
| C  | -0.724234 | -4.585809 | 2.255814  |
| C  | -1.635692 | -5.427829 | 2.901735  |
| C  | -2.766573 | -5.888567 | 2.220905  |
| C  | -2.974941 | -5.498870 | 0.892885  |
| C  | -2.057246 | -4.664470 | 0.251439  |
| Si | 0.878298  | -0.977848 | -1.275573 |
| Cl | 2.031001  | 0.006501  | -2.961890 |
| N  | 1.139766  | 0.292487  | 0.073400  |
| C  | 2.107158  | 0.515198  | 1.193775  |
| C  | 3.443361  | 0.978908  | 0.585619  |
| C  | 0.208512  | 1.121150  | -0.454385 |
| N  | -0.378592 | 0.505520  | -1.483581 |
| C  | -1.271604 | 1.122201  | -2.525146 |
| C  | -1.559788 | 0.058315  | -3.591789 |
| C  | -0.069319 | 2.506837  | 0.007088  |
| C  | -1.154372 | 2.771087  | 0.853373  |
| C  | -1.382688 | 4.072771  | 1.305224  |
| C  | -0.536512 | 5.113590  | 0.907822  |
| C  | 0.542778  | 4.850901  | 0.056469  |
| C  | 0.779909  | 3.550018  | -0.391400 |
| C  | 2.313969  | -0.806248 | 1.956876  |
| C  | 1.616172  | 1.541372  | 2.231232  |
| C  | -2.604901 | 1.581099  | -1.906452 |
| C  | -0.598042 | 2.320753  | -3.222863 |
| Cl | 2.617339  | -2.314914 | -1.084011 |
| B  | -0.207106 | -2.969165 | -2.828242 |
| O  | 0.656285  | -4.041028 | -2.964471 |
| C  | -0.103097 | -5.159055 | -3.551027 |
| C  | 0.768143  | -5.778386 | -4.640182 |
| O  | -1.505774 | -3.244087 | -3.244901 |
| C  | -1.406046 | -4.442508 | -4.093875 |
| C  | -1.256630 | -3.931576 | -5.530570 |
| C  | -2.688636 | -5.247930 | -3.947199 |
| C  | -0.360474 | -6.192167 | -2.456064 |
| H  | -1.808399 | 1.953747  | 1.161884  |
| H  | 1.622419  | 3.340348  | -1.052779 |
| H  | -2.225958 | 4.274094  | 1.968418  |
| H  | 1.384897  | -1.126589 | 2.450663  |
| H  | 3.066789  | -0.645045 | 2.741159  |
| H  | 2.668364  | -1.609681 | 1.304202  |
| H  | 1.203686  | 5.660055  | -0.259388 |
| H  | -0.718267 | 6.130581  | 1.260593  |
| H  | -3.066276 | 0.776773  | -1.322500 |
| H  | -3.292971 | 1.864351  | -2.716527 |
| H  | -2.470792 | 2.455809  | -1.259514 |
| H  | -0.480151 | 3.175343  | -2.546642 |
| H  | -1.236344 | 2.642626  | -4.059343 |
| H  | 0.385115  | 2.038535  | -3.619042 |
| H  | 1.611793  | 2.569397  | 1.855955  |
| H  | 2.303337  | 1.501028  | 3.088207  |
| H  | 0.608736  | 1.293807  | 2.593790  |
| H  | 3.821084  | 0.236314  | -0.130088 |
| H  | 4.191800  | 1.116334  | 1.380094  |

|   |           |           |           |
|---|-----------|-----------|-----------|
| H | 3.317682  | 1.935595  | 0.059142  |
| H | -0.639718 | -0.246005 | -4.107774 |
| H | -2.241789 | 0.485982  | -4.340010 |
| H | -2.036127 | -0.831422 | -3.168084 |
| H | 0.821749  | -2.978868 | 1.039510  |
| H | 0.151277  | -4.219072 | 2.798735  |
| H | -2.241756 | -4.347754 | -0.775513 |
| H | -3.859269 | -5.845955 | 0.353422  |
| H | -3.484819 | -6.540025 | 2.723168  |
| H | -1.464717 | -5.716708 | 3.941201  |
| H | 0.754224  | -4.001635 | -0.395159 |
| H | 0.281758  | -1.854791 | -2.946446 |
| H | -0.345576 | -3.327079 | -5.645140 |
| H | -1.222059 | -4.759043 | -6.252578 |
| H | -2.118995 | -3.294591 | -5.770100 |
| H | 0.209295  | -6.552517 | -5.185721 |
| H | 1.118431  | -5.025379 | -5.356170 |
| H | 1.646495  | -6.252546 | -4.180300 |
| H | -3.537822 | -4.656499 | -4.317865 |
| H | -2.630813 | -6.171194 | -4.541608 |
| H | 0.603281  | -6.505627 | -2.030959 |
| H | -2.883597 | -5.516965 | -2.901617 |
| H | -0.860127 | -7.080715 | -2.867285 |
| H | -0.975082 | -5.791150 | -1.643104 |
| H | -0.610453 | -1.049244 | 1.808779  |
| H | -2.810036 | -2.219536 | -1.691640 |
| H | -2.688840 | -0.194819 | 2.847997  |
| H | -4.908914 | -1.375874 | -0.658443 |
| H | -4.860114 | -0.352435 | 1.619967  |

### Pdt-2

PBE/TZVP Energy : -1802309.46 kcal/mol

|    |           |           |           |
|----|-----------|-----------|-----------|
| C  | -1.058642 | 3.608424  | 1.253971  |
| C  | -0.622634 | 3.905925  | -0.045045 |
| C  | -0.771133 | 5.201035  | -0.558696 |
| C  | -1.351408 | 6.196928  | 0.230360  |
| C  | -1.796336 | 5.899479  | 1.523375  |
| C  | -1.652366 | 4.603309  | 2.031396  |
| C  | -0.060395 | 2.810936  | -0.871297 |
| N  | 1.143817  | 2.183576  | -0.668636 |
| C  | 2.367329  | 2.646914  | 0.062519  |
| C  | 2.639139  | 1.681544  | 1.227836  |
| N  | -0.674882 | 2.179239  | -1.852804 |
| C  | -2.044469 | 2.291417  | -2.406199 |
| C  | -3.106539 | 2.682179  | -1.364432 |
| Si | 0.759932  | 0.823348  | -1.851358 |
| Cl | 2.471691  | -0.558495 | -1.492581 |
| N  | -0.019623 | -1.847002 | 1.111453  |
| B  | -0.246105 | -2.724121 | -0.013074 |
| O  | -1.385988 | -2.765848 | -0.803894 |
| C  | -1.088954 | -3.680378 | -1.920913 |
| C  | -2.368755 | -4.417849 | -2.286478 |
| C  | 1.268941  | -2.010670 | 1.795308  |
| C  | 1.231296  | -2.843229 | 3.065816  |

|    |           |           |           |
|----|-----------|-----------|-----------|
| C  | 2.230684  | -2.667397 | 4.035018  |
| C  | 2.249525  | -3.450077 | 5.193416  |
| C  | 1.261160  | -4.419288 | 5.401204  |
| C  | 0.258735  | -4.597475 | 4.441517  |
| C  | 0.245735  | -3.815112 | 3.282330  |
| C  | -0.943442 | -0.932294 | 1.659172  |
| C  | -2.177235 | -0.655308 | 1.026704  |
| C  | -3.094514 | 0.223040  | 1.602714  |
| C  | -2.820246 | 0.869238  | 2.813078  |
| C  | -1.596323 | 0.617578  | 3.437070  |
| C  | -0.671081 | -0.267083 | 2.876237  |
| Cl | 1.217572  | 1.109366  | -3.919067 |
| C  | -2.013844 | 3.320464  | -3.552529 |
| C  | -2.410483 | 0.908361  | -2.976604 |
| C  | 2.236004  | 4.071848  | 0.623969  |
| C  | 3.541938  | 2.663251  | -0.934772 |
| O  | 0.702807  | -3.673500 | -0.371168 |
| C  | 0.047562  | -4.584993 | -1.315941 |
| C  | -0.493660 | -5.758229 | -0.494920 |
| C  | 1.082613  | -5.064440 | -2.323199 |
| C  | -0.607776 | -2.822272 | -3.091910 |
| H  | -0.954490 | 2.594018  | 1.643682  |
| H  | -0.422258 | 5.432306  | -1.566600 |
| H  | -2.003597 | 4.364350  | 3.037223  |
| H  | 1.785643  | 1.674673  | 1.922125  |
| H  | 3.535569  | 2.000780  | 1.779674  |
| H  | 2.801066  | 0.661079  | 0.861162  |
| H  | -1.459283 | 7.207637  | -0.167500 |
| H  | -2.256747 | 6.677990  | 2.134653  |
| H  | -3.050662 | 2.026895  | -0.484707 |
| H  | -4.101073 | 2.567335  | -1.819786 |
| H  | -3.007039 | 3.721703  | -1.031190 |
| H  | -1.771043 | 4.322050  | -3.170799 |
| H  | -2.998466 | 3.367821  | -4.040973 |
| H  | -1.261083 | 3.039059  | -4.301789 |
| H  | 1.993510  | 4.802222  | -0.159321 |
| H  | 3.212622  | 4.345113  | 1.047937  |
| H  | 1.489746  | 4.150588  | 1.422636  |
| H  | 3.724516  | 1.673195  | -1.367307 |
| H  | 4.456868  | 2.985555  | -0.416702 |
| H  | 3.337529  | 3.372983  | -1.749857 |
| H  | -1.670024 | 0.575170  | -3.717221 |
| H  | -3.388915 | 0.967168  | -3.473212 |
| H  | -2.473046 | 0.154411  | -2.178938 |
| H  | 1.693920  | -1.018859 | 2.012194  |
| H  | 3.000468  | -1.905430 | 3.881756  |
| H  | -0.544305 | -3.954177 | 2.541449  |
| H  | -0.519086 | -5.348510 | 4.596504  |
| H  | 1.270094  | -5.028217 | 6.307524  |
| H  | 3.033651  | -3.298337 | 5.938412  |
| H  | 1.957979  | -2.480867 | 1.081231  |
| H  | -0.209199 | -0.243447 | -1.493927 |
| H  | 0.326920  | -2.298800 | -2.846814 |
| H  | -0.443832 | -3.435560 | -3.988719 |
| H  | -1.374582 | -2.070610 | -3.322135 |



|   |           |           |           |
|---|-----------|-----------|-----------|
| H | 0.605208  | -5.672698 | -3.105415 |
| H | 1.599245  | -4.221358 | -2.797254 |
| H | 1.831371  | -5.688955 | -1.815288 |
| H | -3.101446 | -3.706368 | -2.693277 |
| H | -2.165768 | -5.175513 | -3.057015 |
| H | 0.335924  | -6.212132 | 0.064259  |
| H | -2.813698 | -4.912628 | -1.414693 |
| H | -0.939293 | -6.527020 | -1.141237 |
| H | -1.253344 | -5.425117 | 0.227123  |
| H | 0.255543  | -0.454589 | 3.415715  |
| H | -2.417381 | -1.141518 | 0.083689  |
| H | -1.349387 | 1.108650  | 4.381246  |
| H | -4.042074 | 0.404107  | 1.089978  |
| H | -3.541599 | 1.559039  | 3.254241  |

$^1\text{H}$  NMR Spectrum of **2** ( $\text{CDCl}_3$ , 200 MHz, 298 K)

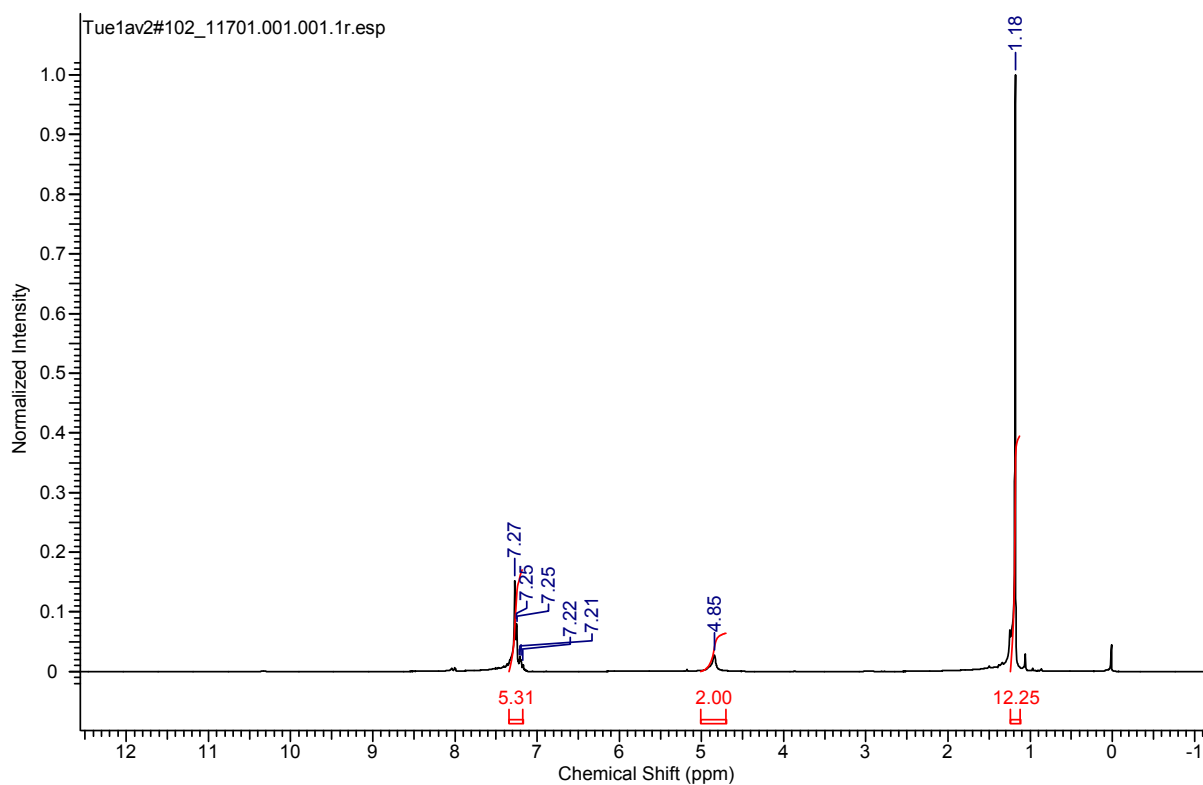

$^{13}\text{C}$  NMR spectrum of **2** ( $\text{CDCl}_3$ , 50.28 MHz, 298 K)

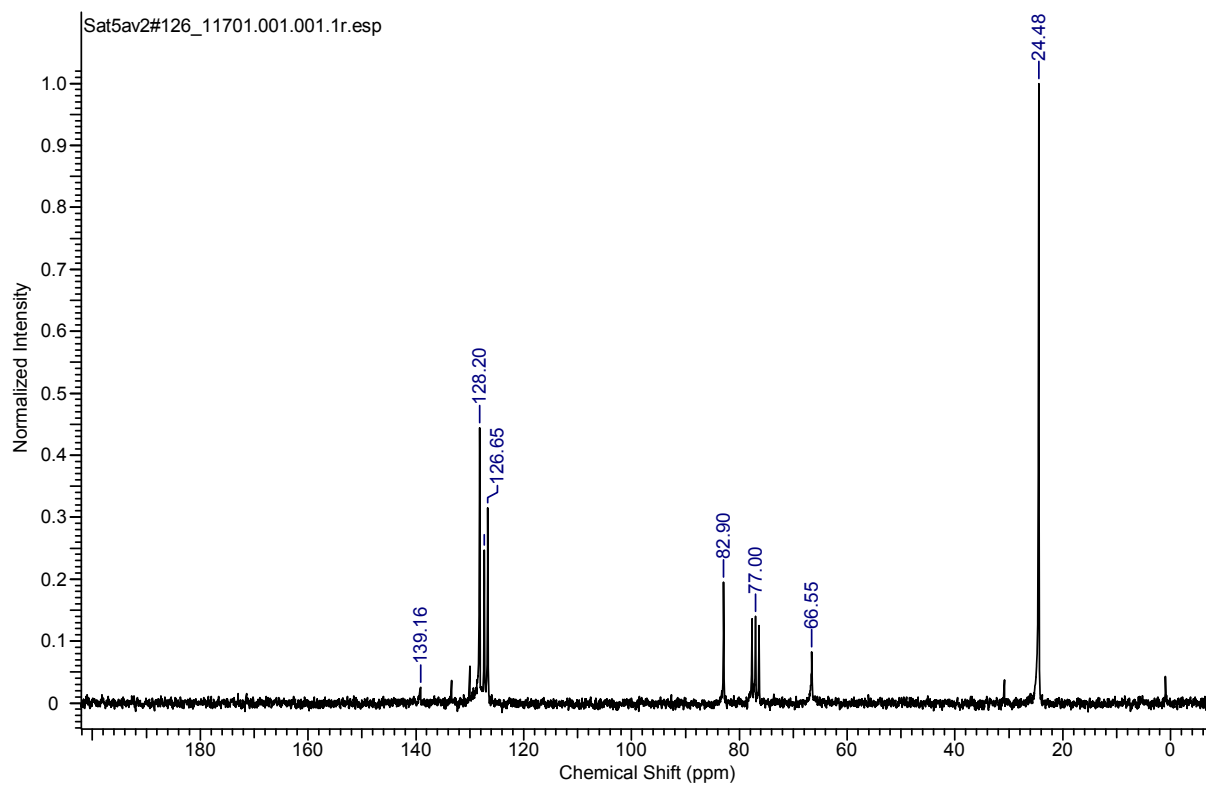

$^1\text{H}$  NMR Spectrum of **3** ( $\text{CDCl}_3$ , 200 MHz, 298 K)

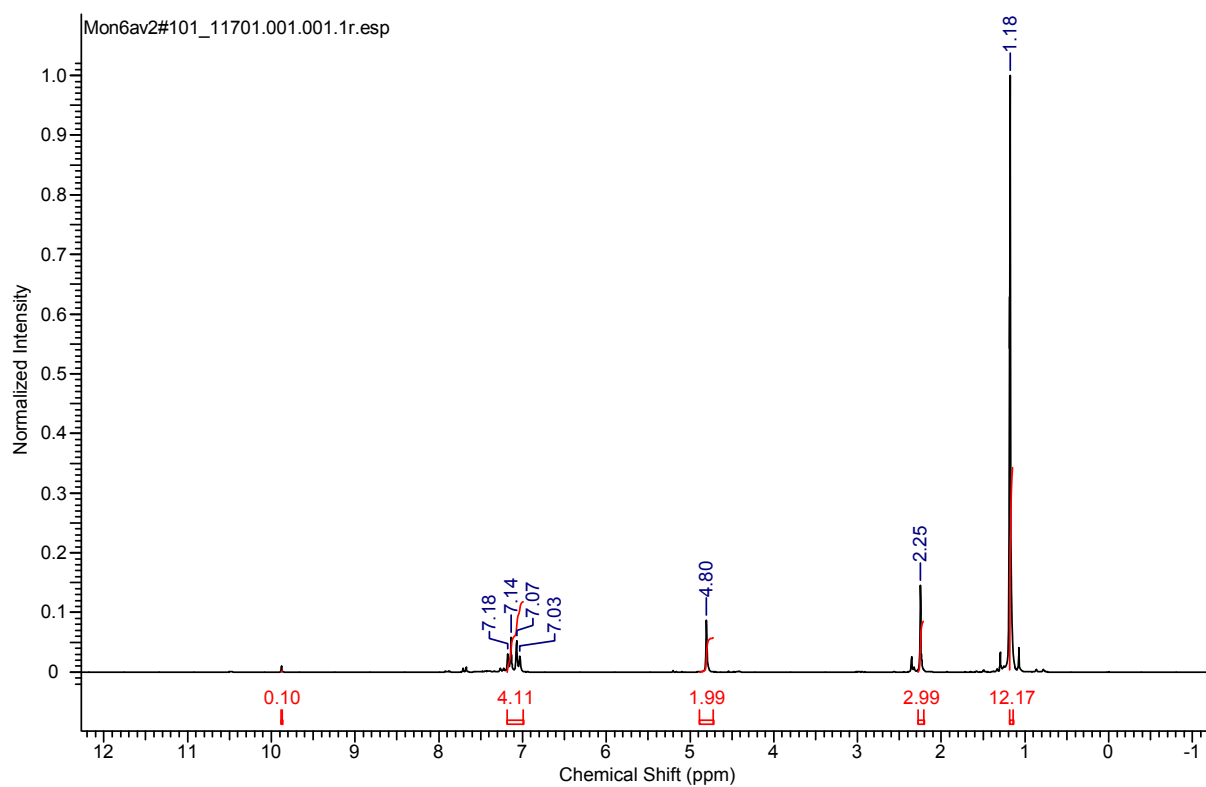

$^{13}\text{C}$  NMR spectrum of **3** ( $\text{CDCl}_3$ , 50.28 MHz, 298 K)

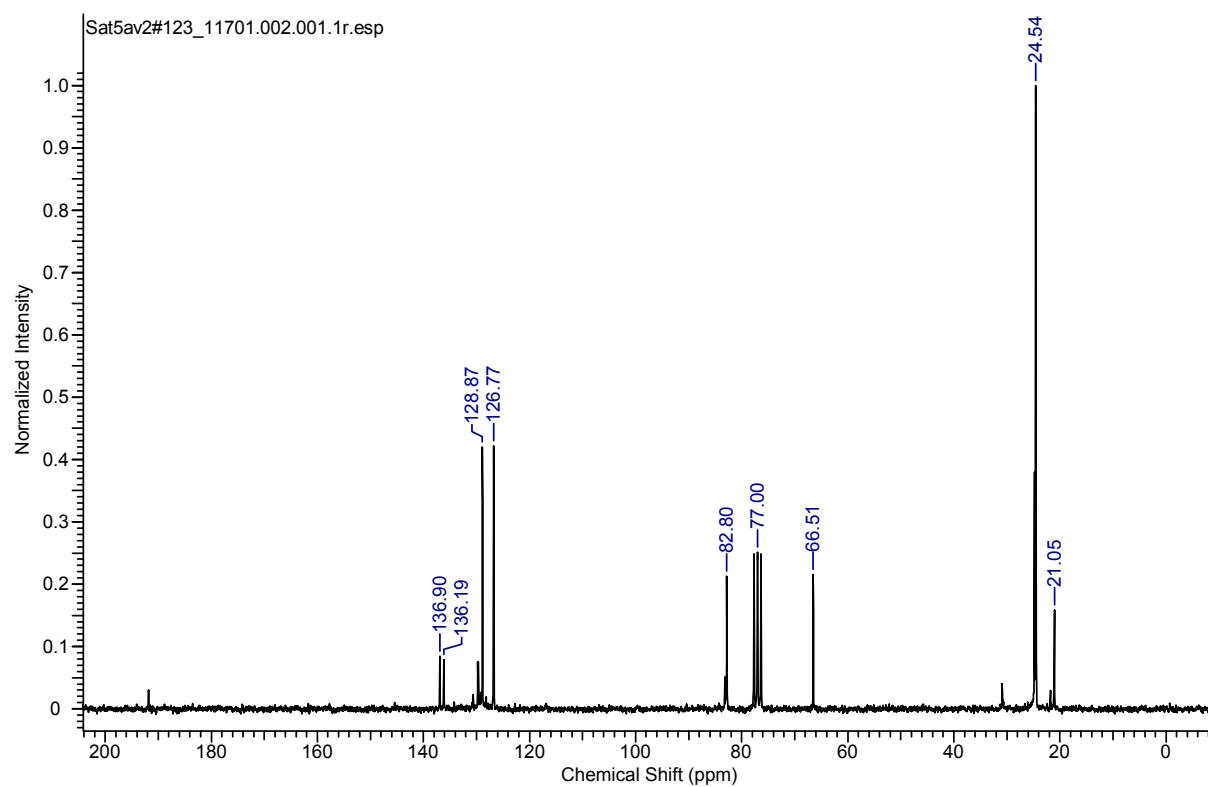

$^1\text{H}$  NMR Spectrum of **4** ( $\text{CDCl}_3$ , 200 MHz, 298 K)

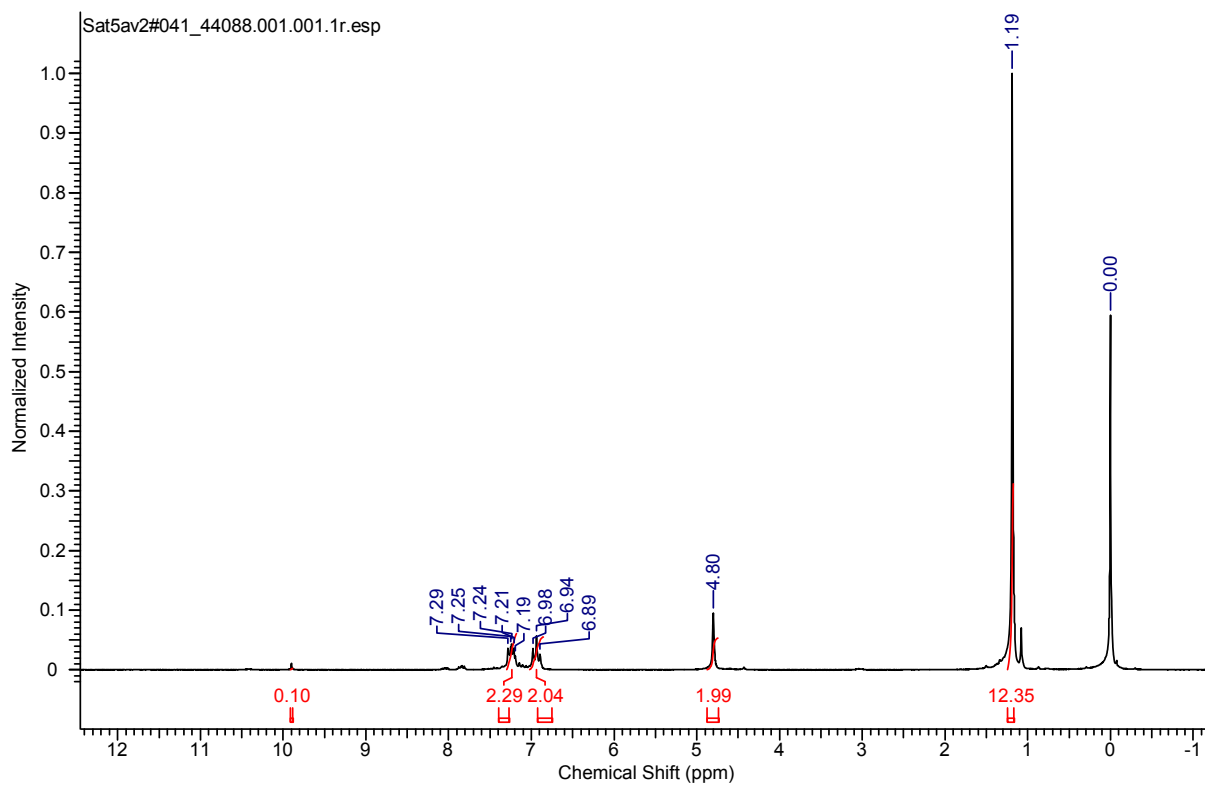

$^{13}\text{C}$  NMR spectrum of **4** ( $\text{CDCl}_3$ , 50.28 MHz, 298 K)

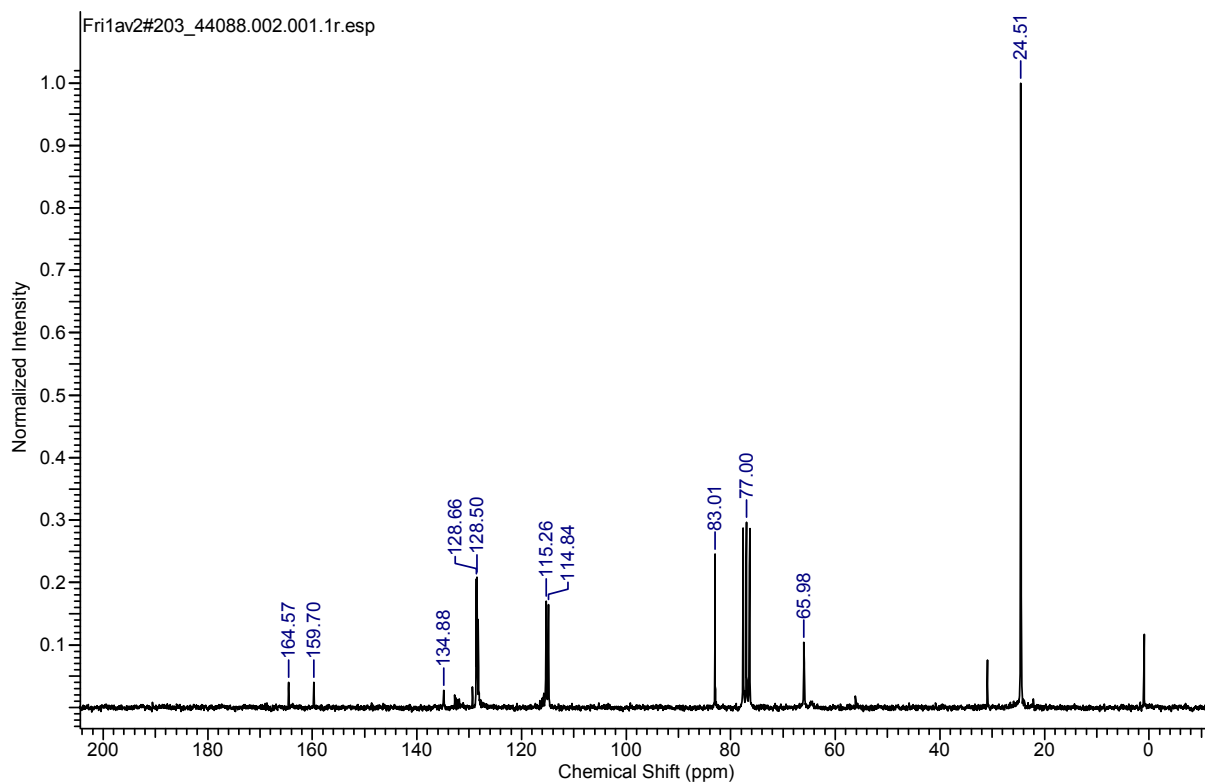

$^1\text{H}$  NMR Spectrum of **5** ( $\text{CDCl}_3$ , 200 MHz, 298 K)

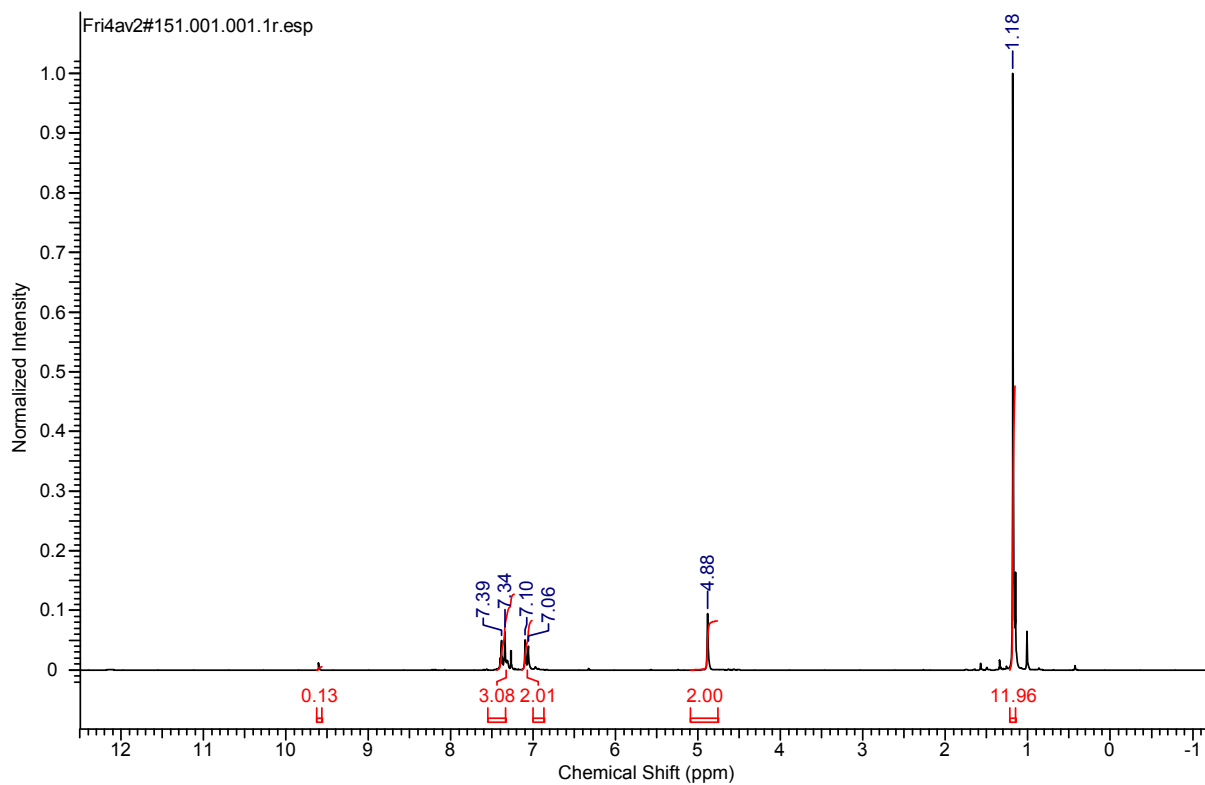

$^1\text{H}$  NMR Spectrum of **5'** (Isolated) ( $\text{CDCl}_3$ , 200 MHz, 298 K)

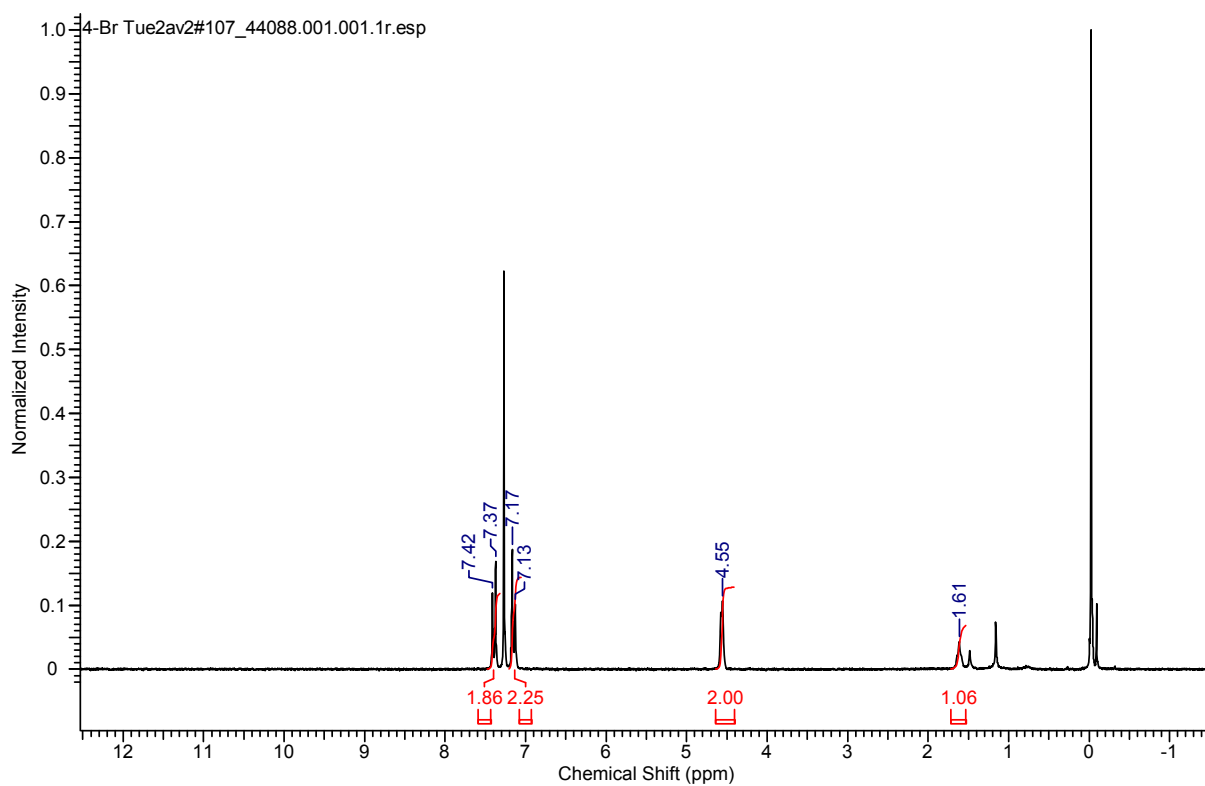

$^{13}\text{C}$  NMR spectrum of **5'** (Isolated) ( $\text{CDCl}_3$ , 50.28 MHz, 298 K)

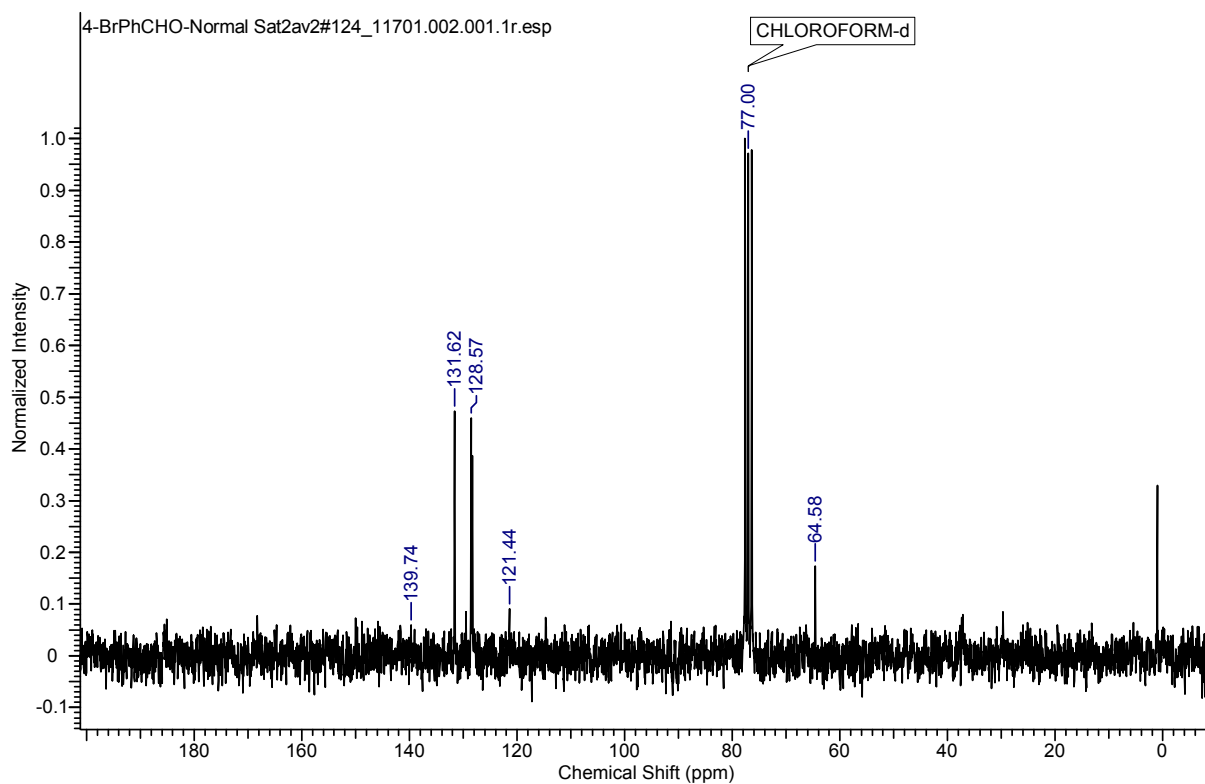

<sup>1</sup>H NMR Spectrum of **6** (CDCl<sub>3</sub>, 200 MHz, 298 K)

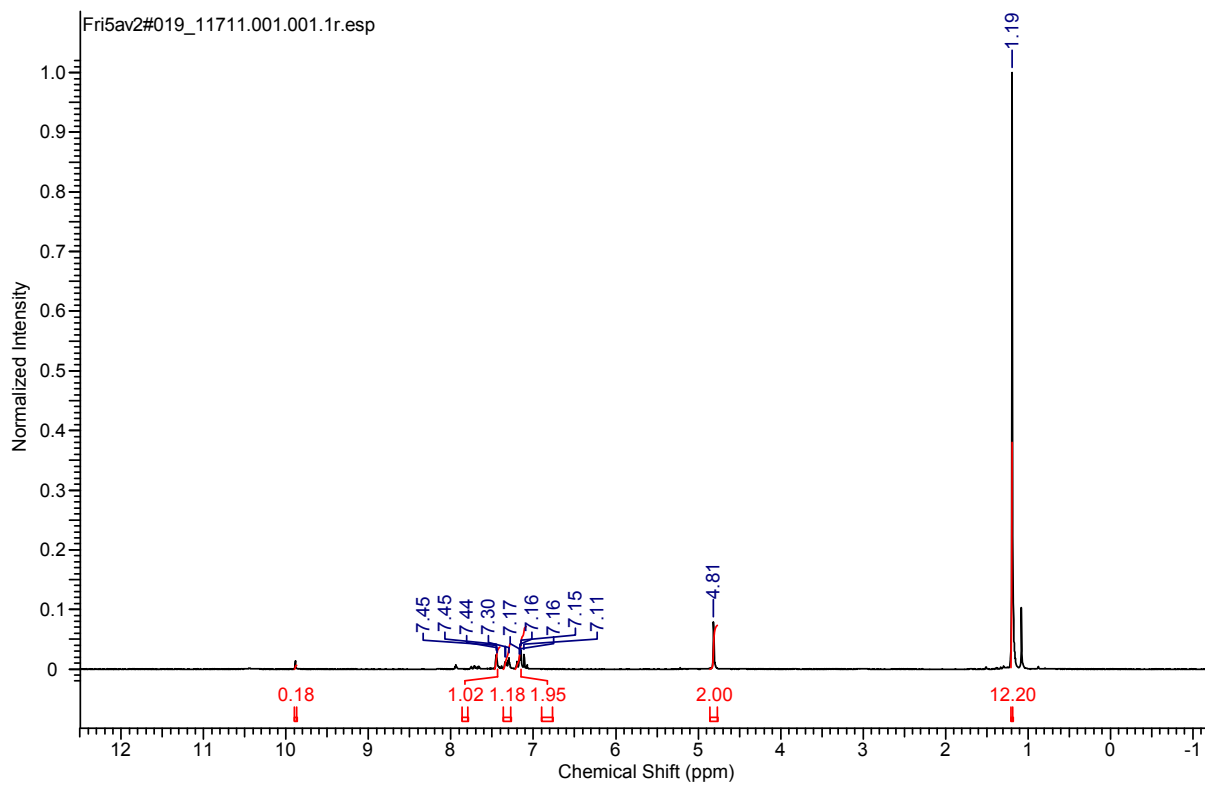

$^{13}\text{C}$  NMR spectrum of **6** ( $\text{CDCl}_3$ , 50.28 MHz, 298 K)

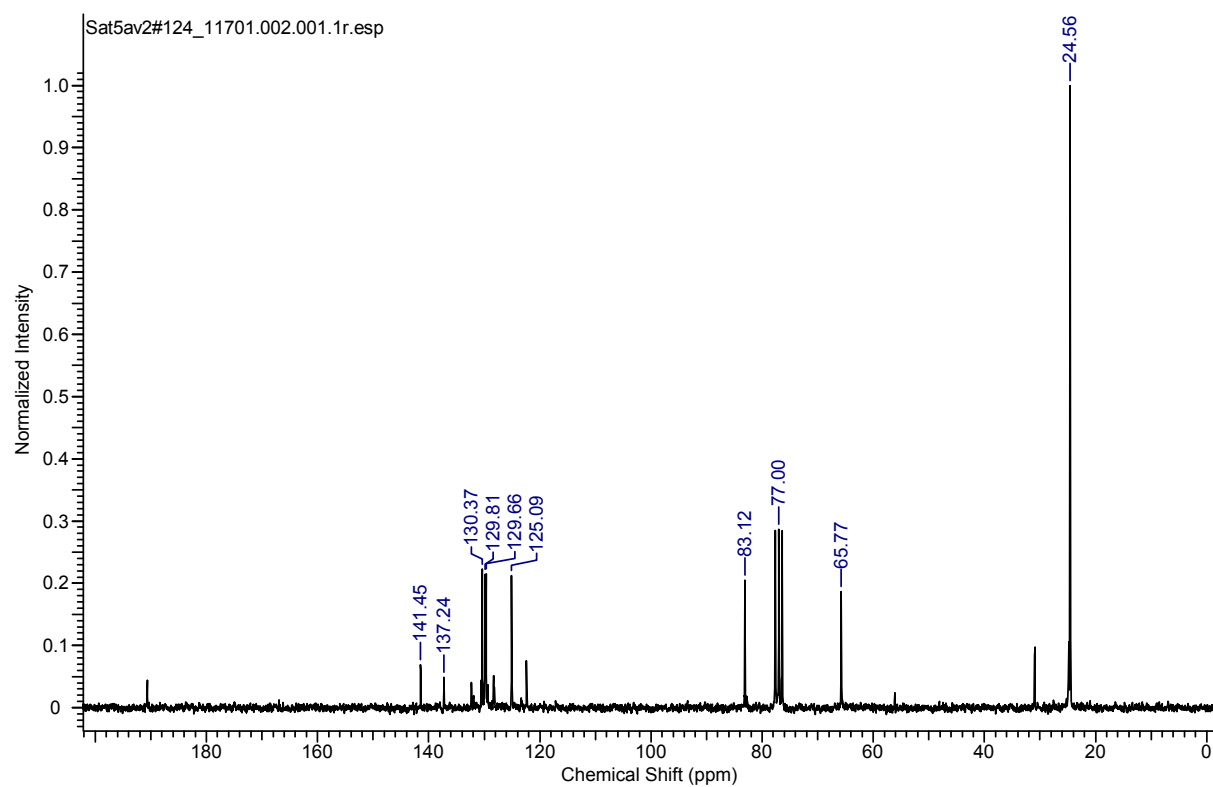

$^1\text{H}$  NMR Spectrum of **7** ( $\text{CDCl}_3$ , 200 MHz, 298 K)

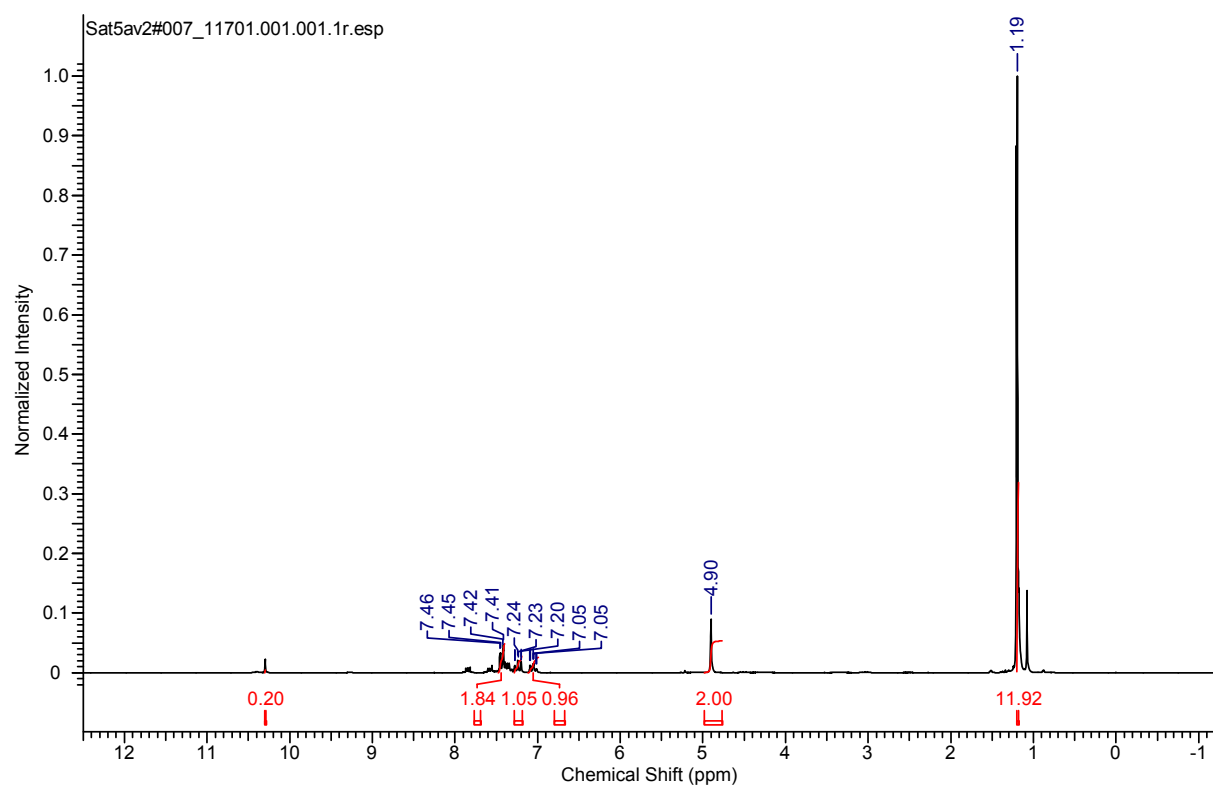

$^{13}\text{C}$  NMR spectrum of **7** ( $\text{CDCl}_3$ , 50.28 MHz, 298 K)

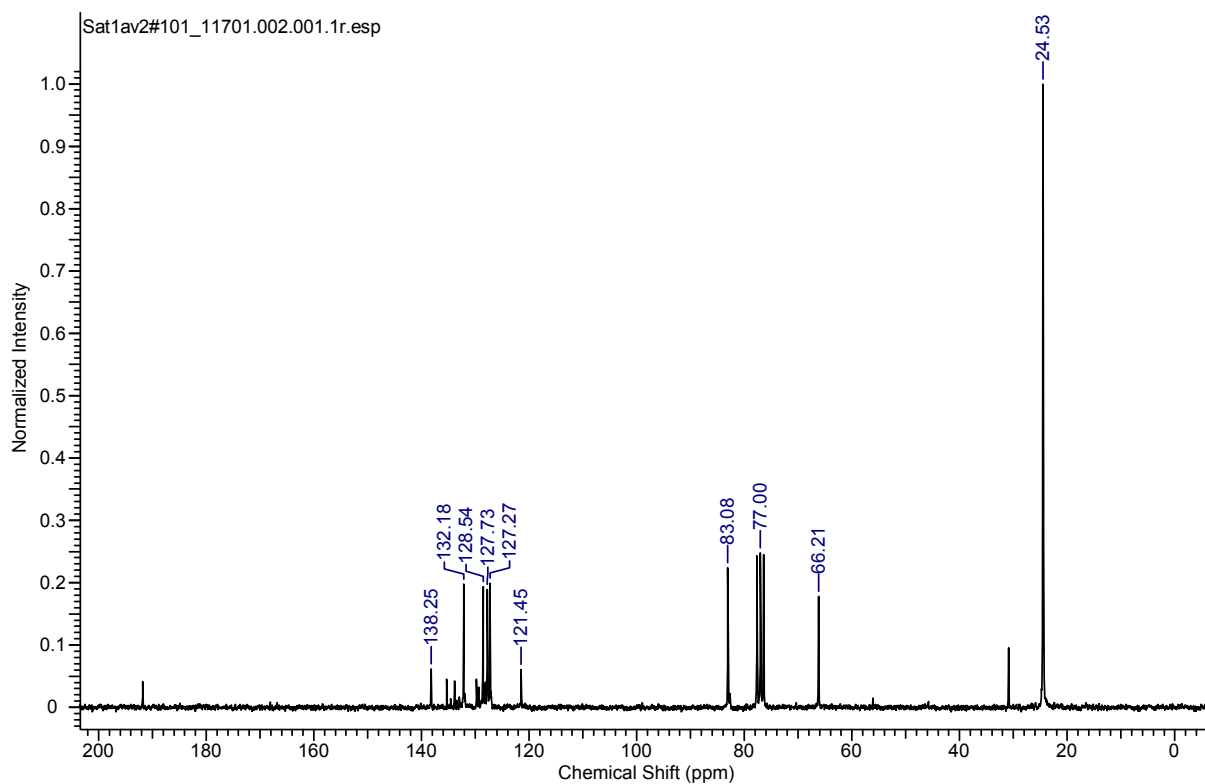

$^1\text{H}$  NMR Spectrum of **8** ( $\text{CDCl}_3$ , 200 MHz, 298 K)

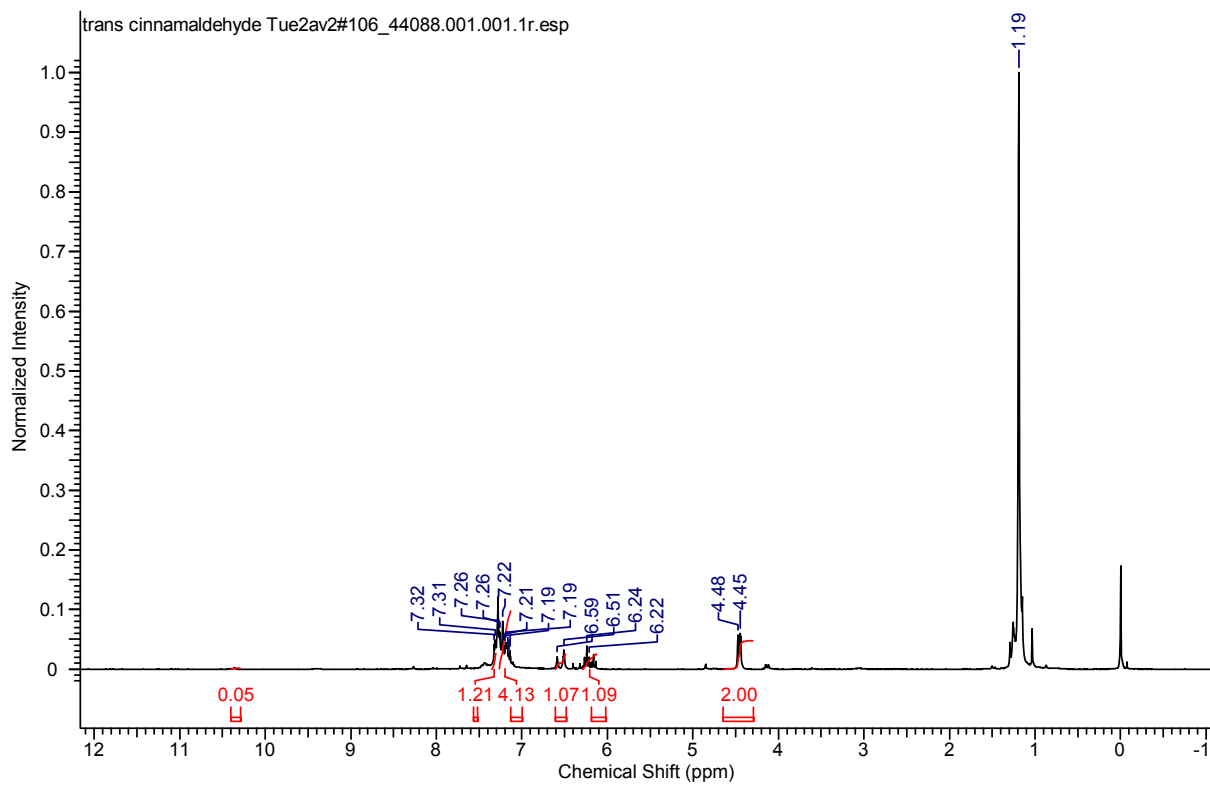



$^{13}\text{C}$  NMR spectrum of **8** ( $\text{CDCl}_3$ , 50.28 MHz, 298 K)

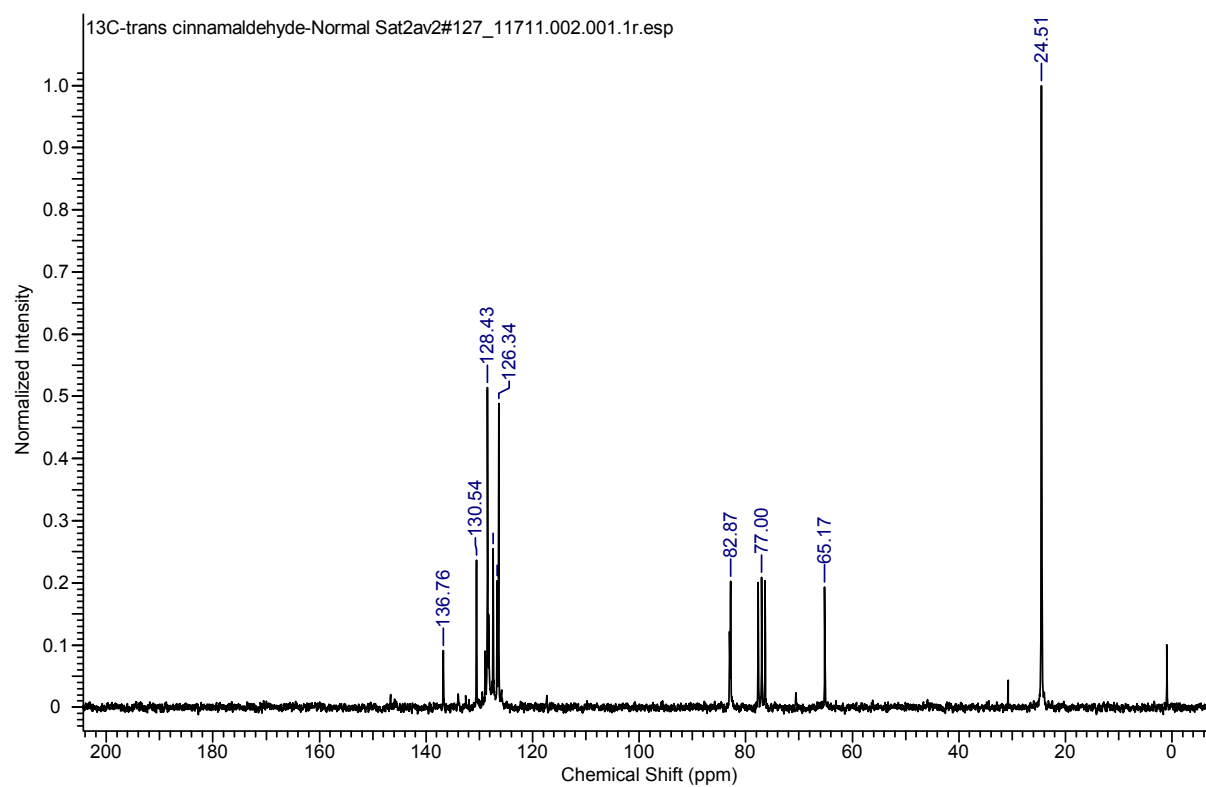

$^1\text{H}$  NMR Spectrum of **9** ( $\text{CDCl}_3$ , 200 MHz, 298 K)

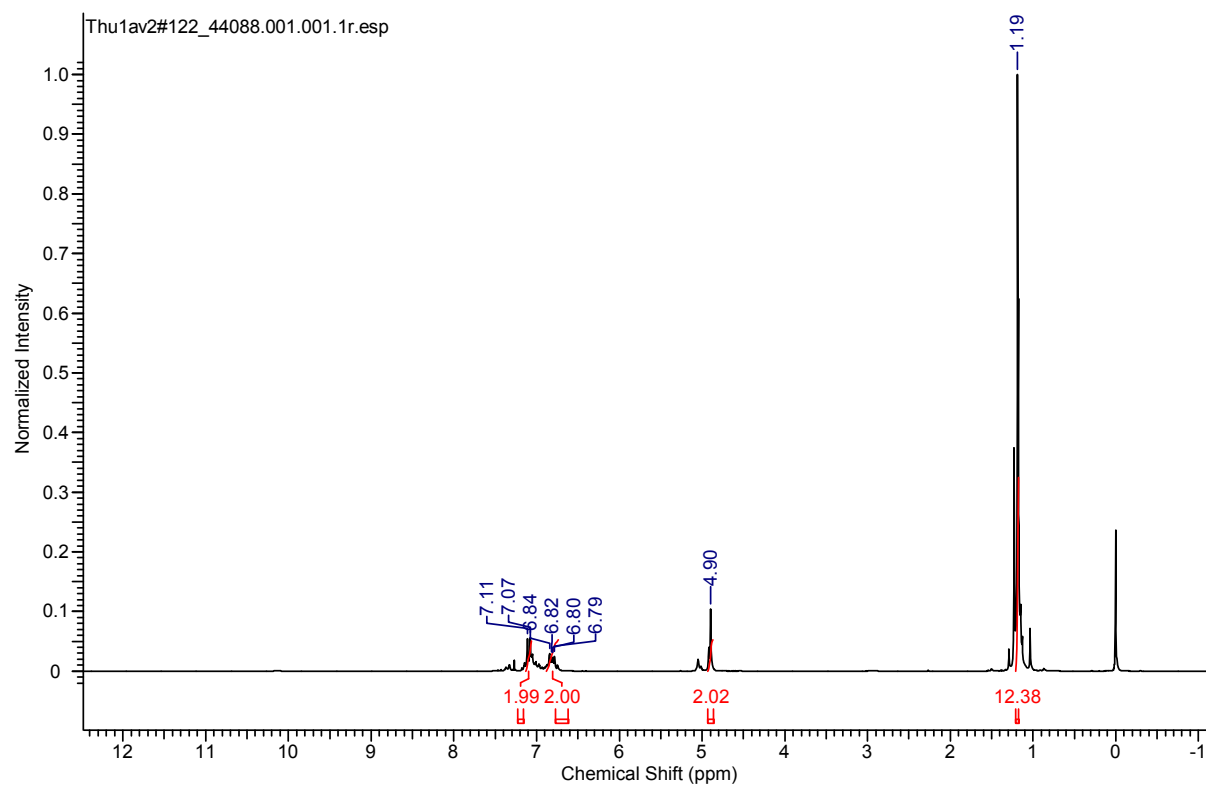

$^{13}\text{C}$  NMR spectrum of **9** ( $\text{CDCl}_3$ , 50.28 MHz, 298 K)

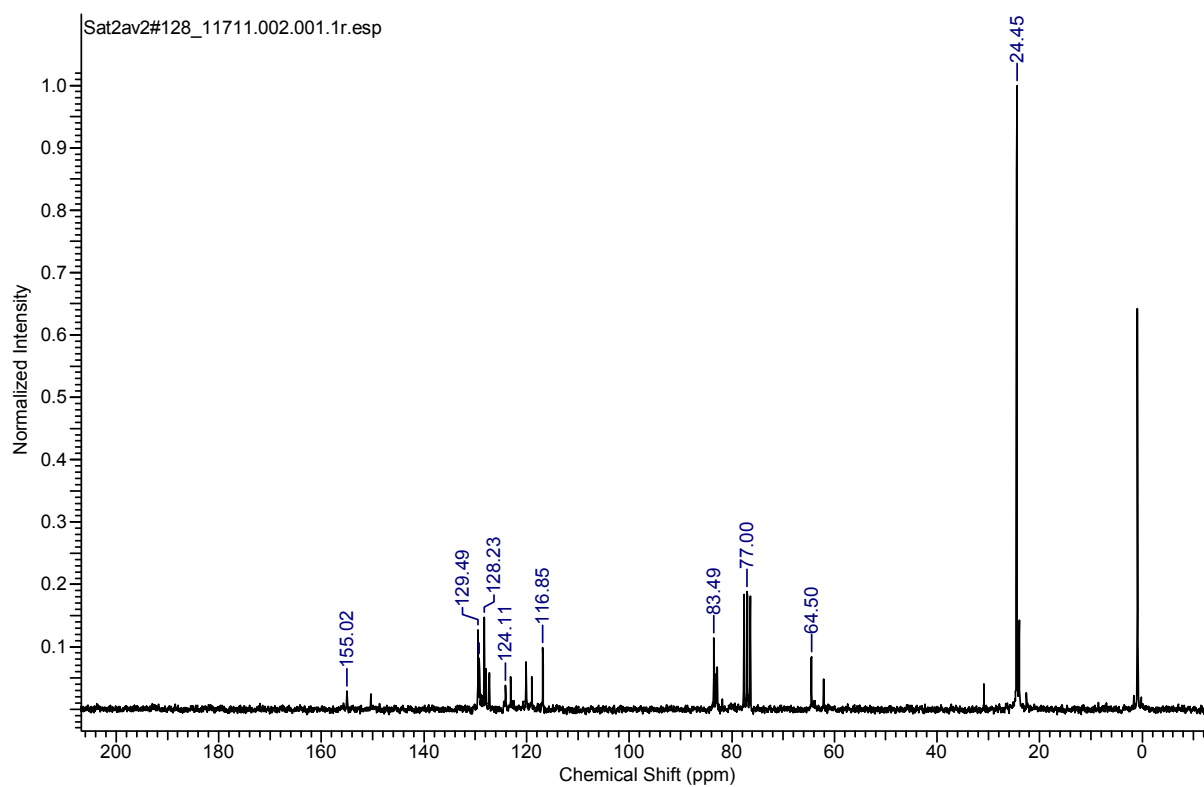

$^1\text{H}$  NMR Spectrum of **10** ( $\text{CDCl}_3$ , 200 MHz, 298 K)

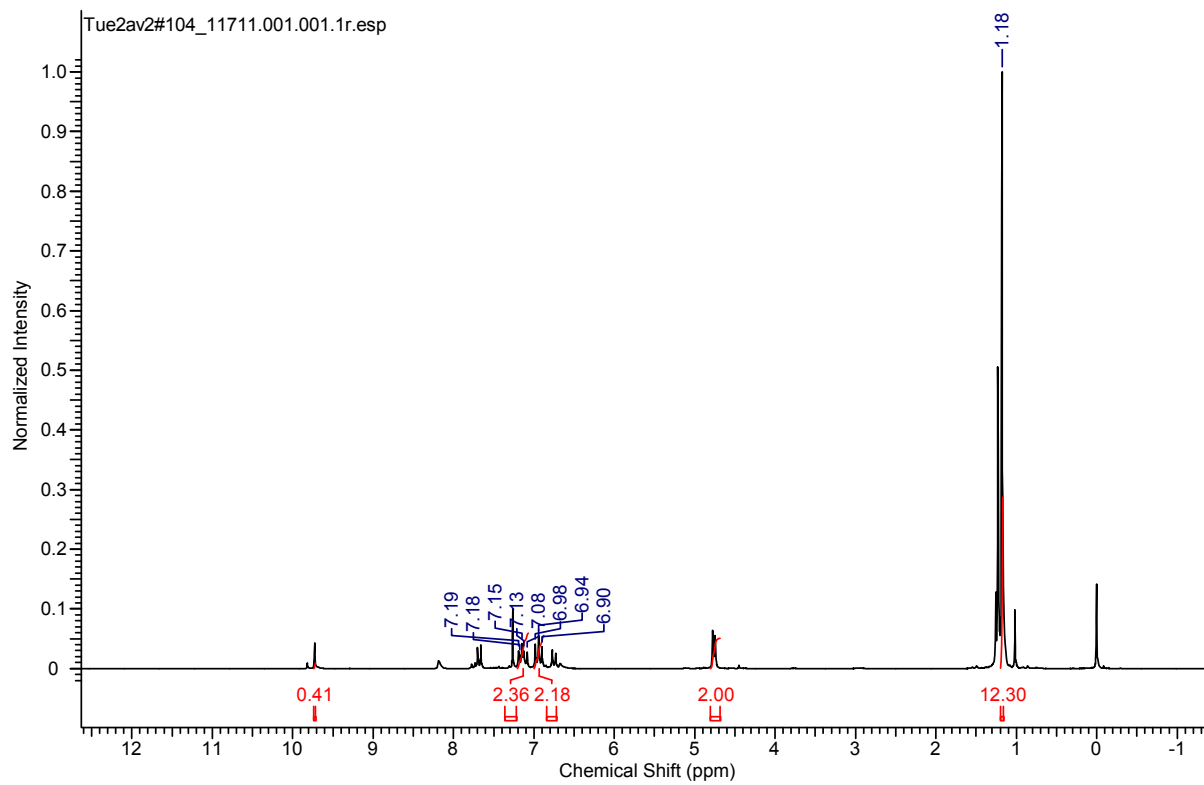

$^{13}\text{C}$  NMR spectrum of **10** ( $\text{CDCl}_3$ , 50.28 MHz, 298 K)

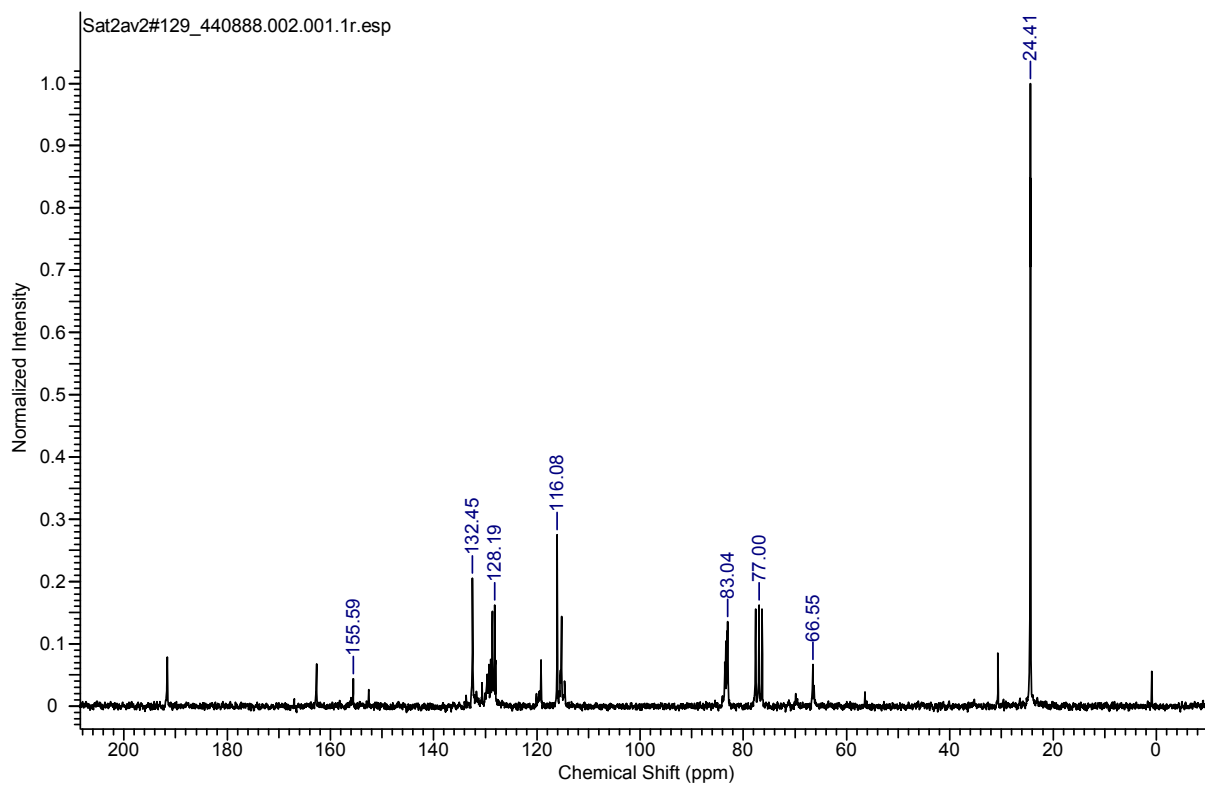

$^1\text{H}$  NMR Spectrum of **11** ( $\text{CDCl}_3$ , 200 MHz, 298 K)

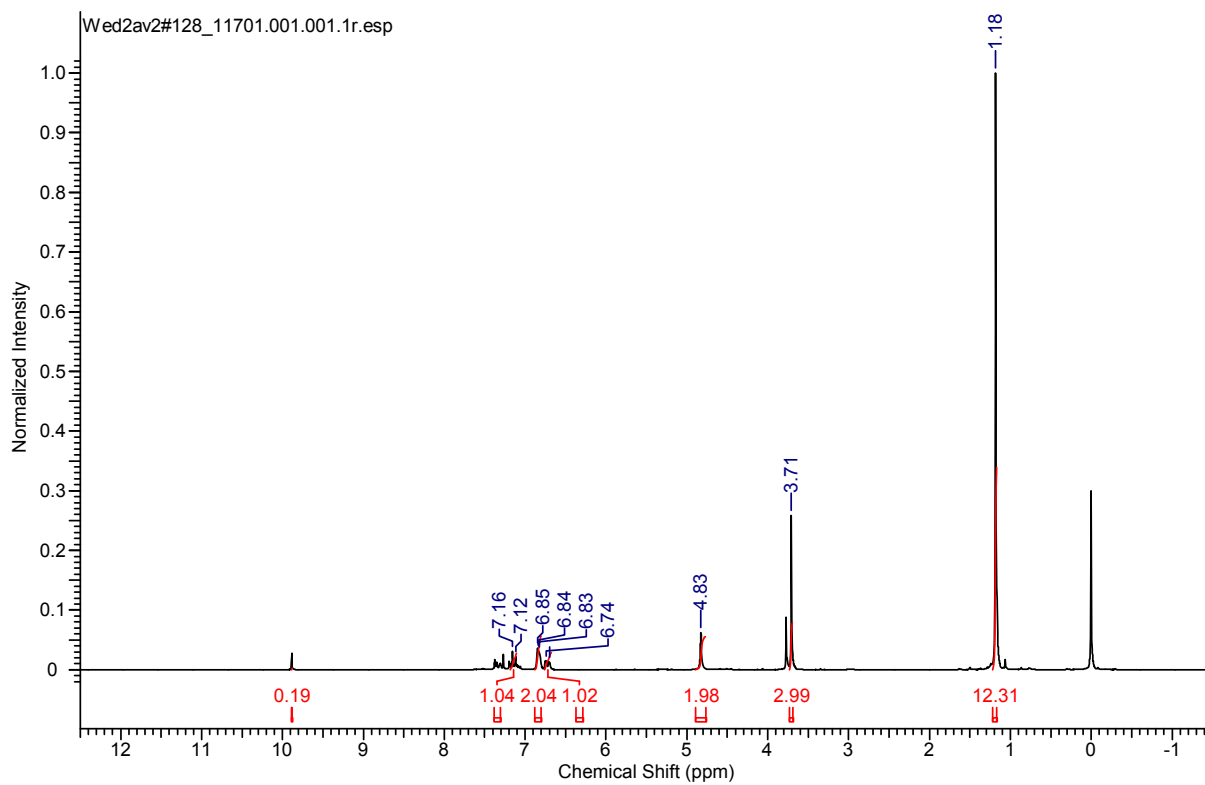

$^{13}\text{C}$  NMR spectrum of **11** ( $\text{CDCl}_3$ , 50.28 MHz, 298 K)

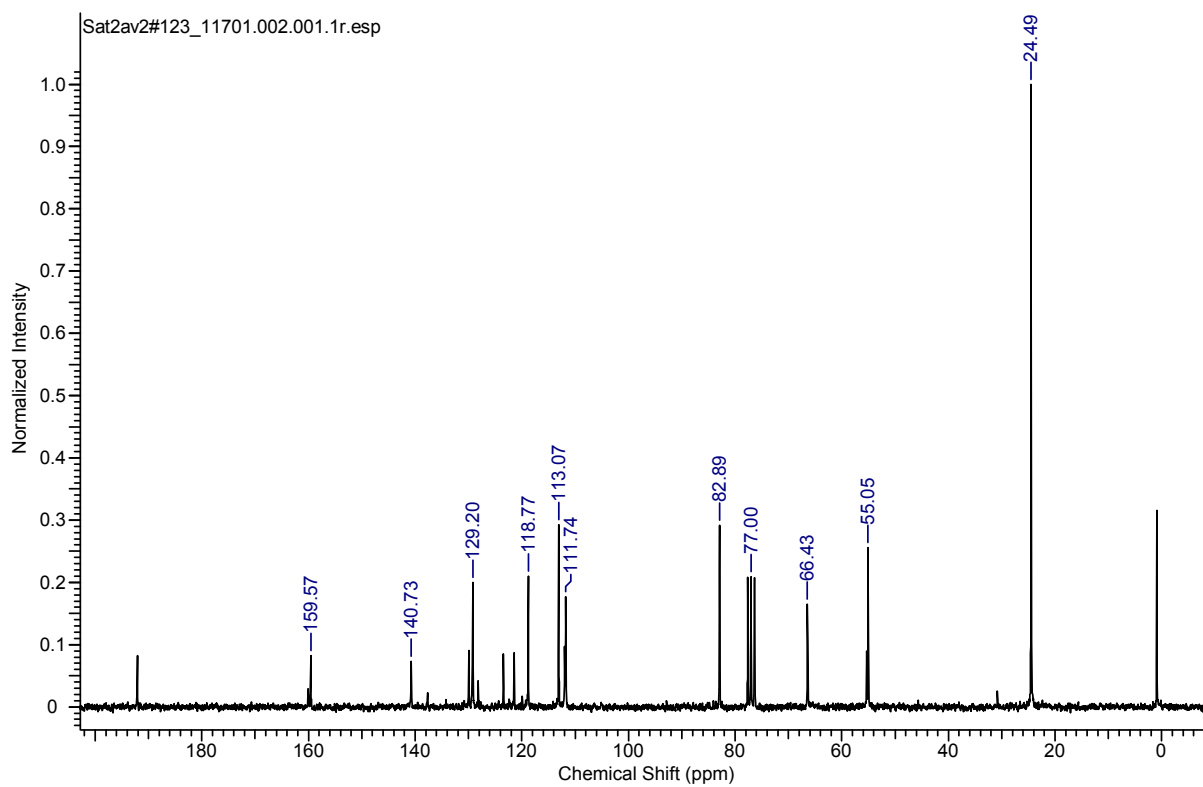

$^1\text{H}$  NMR Spectrum of **12** ( $\text{CDCl}_3$ , 200 MHz, 298 K)

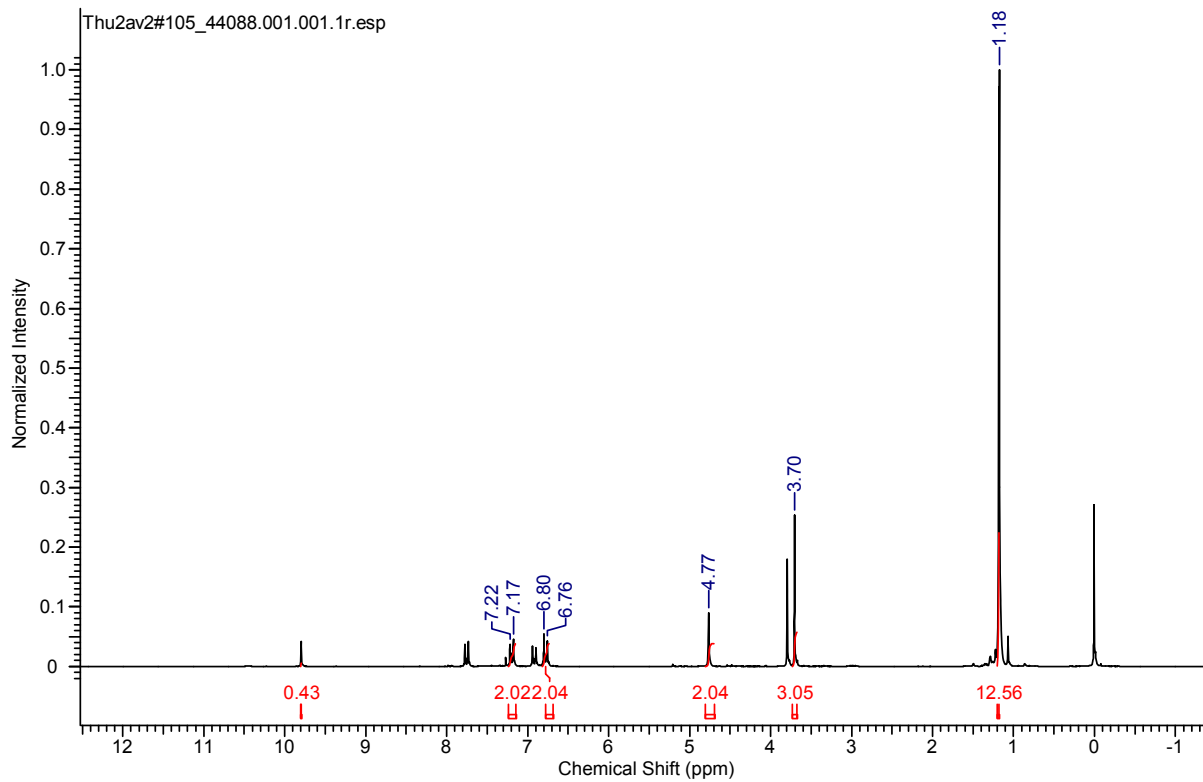

$^1\text{H}$  NMR Spectrum of **13** ( $\text{CDCl}_3$ , 200 MHz, 298 K)

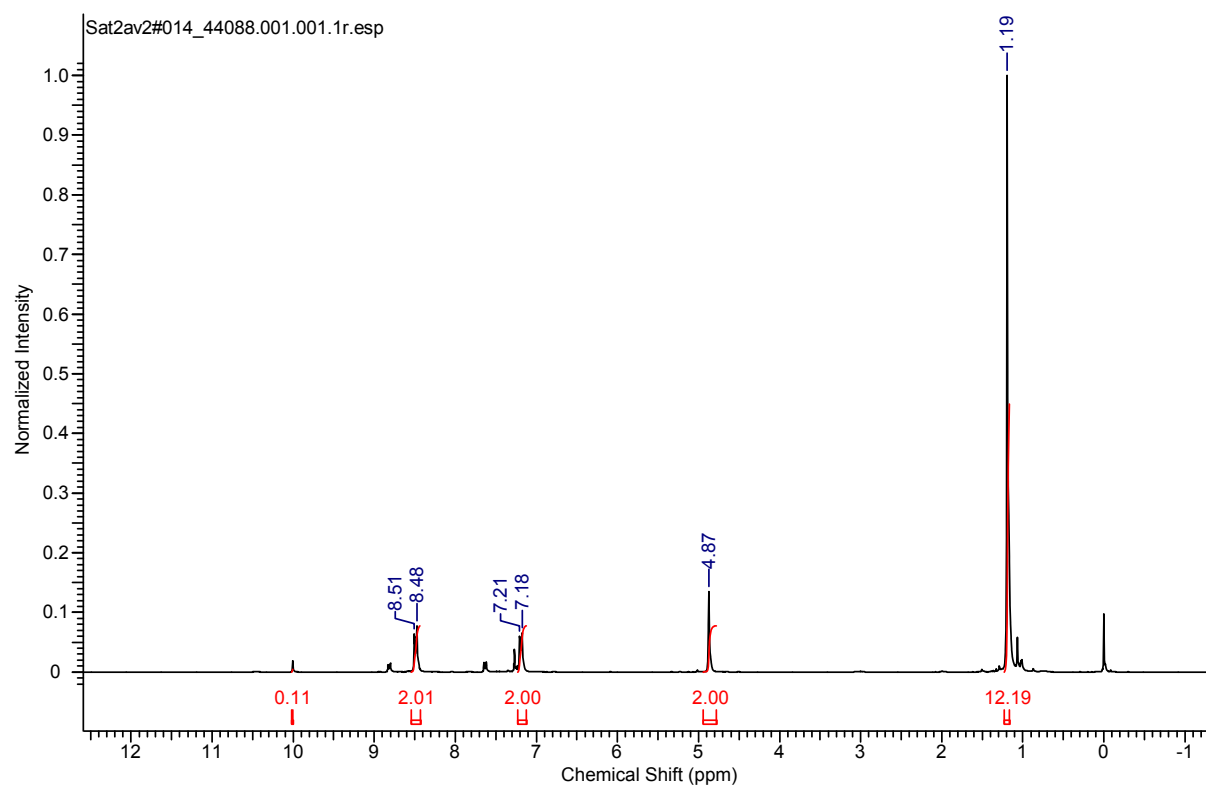

$^{13}\text{C}$  NMR spectrum of **13** ( $\text{CDCl}_3$ , 50.28 MHz, 298 K)

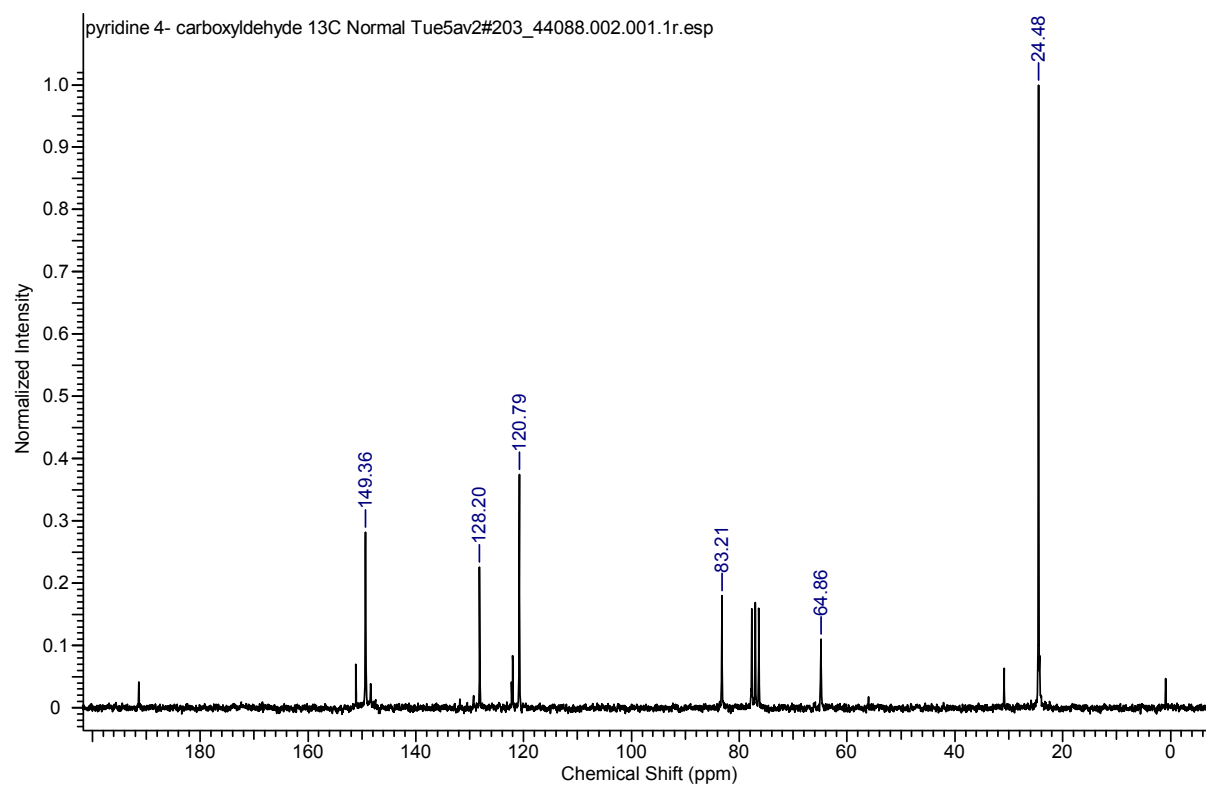

<sup>1</sup>H NMR Spectrum of **13'** (Isolated) (CDCl<sub>3</sub>, 200 MHz, 298 K)

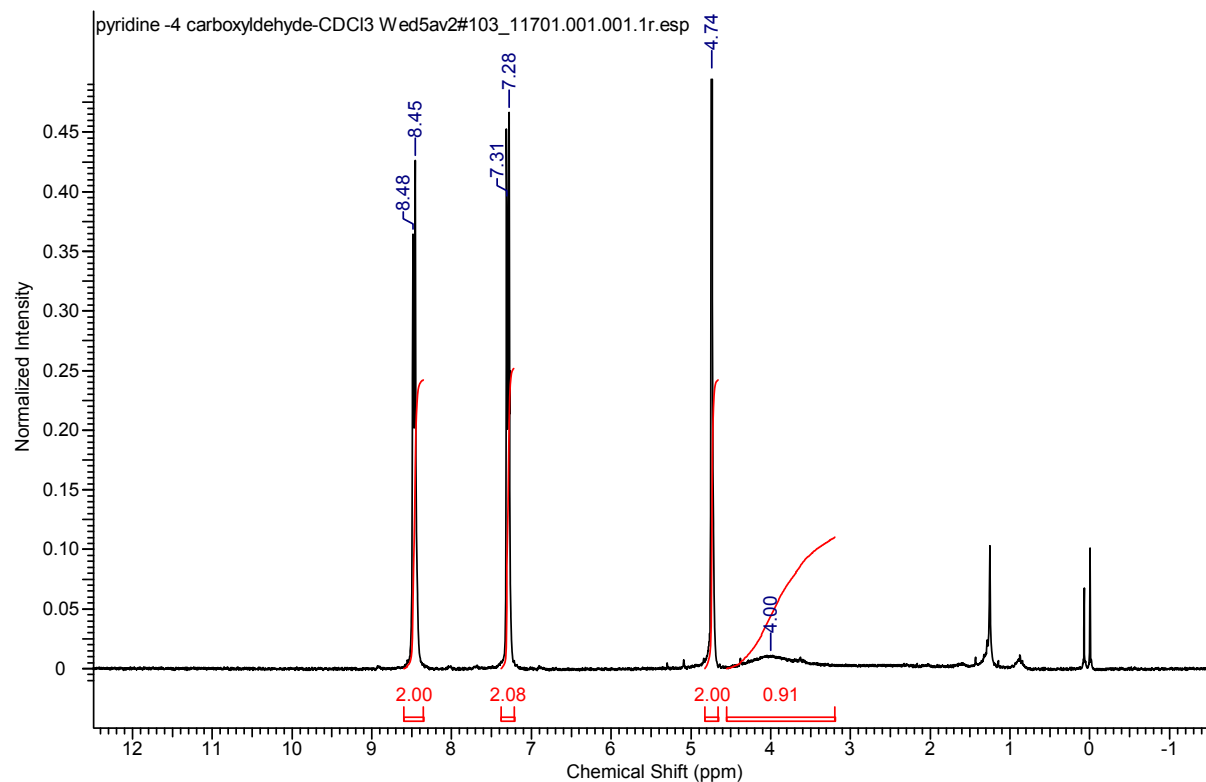

<sup>13</sup>C NMR spectrum of **13'** (Isolated) (CDCl<sub>3</sub>, 50.28 MHz, 298 K)

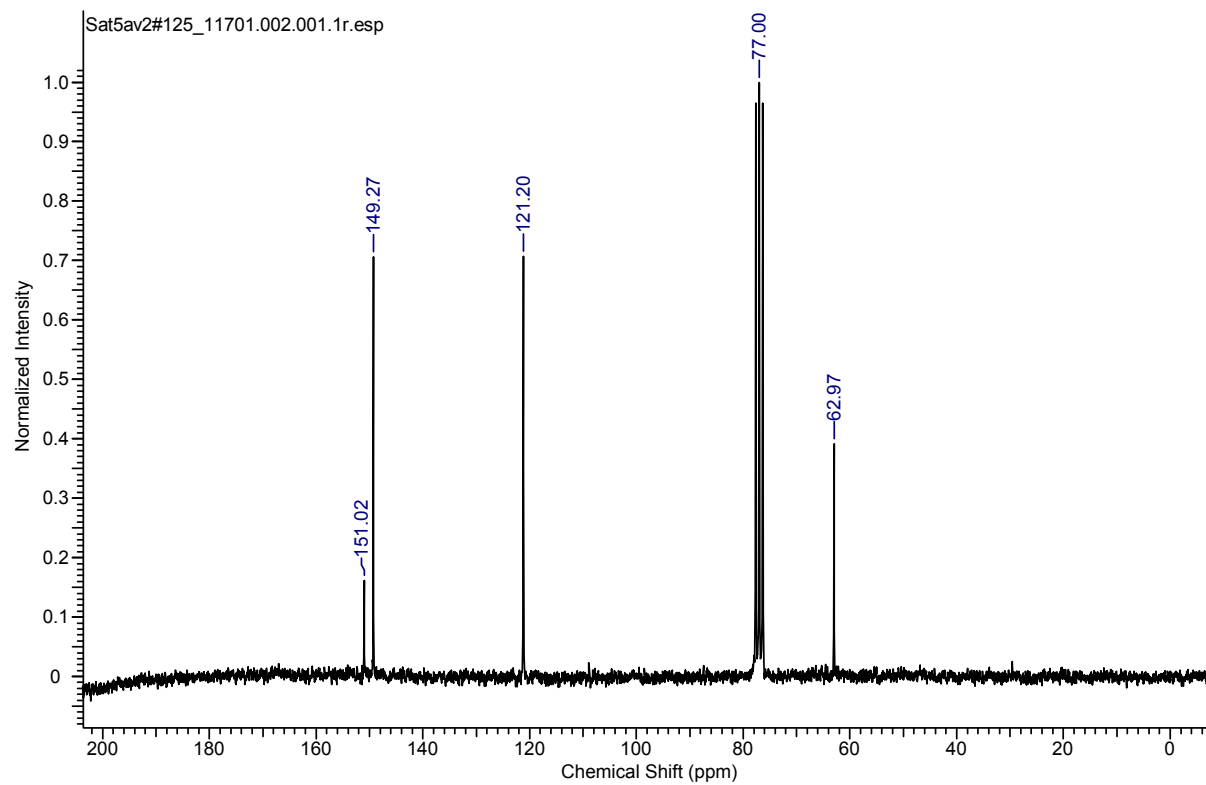

<sup>1</sup>H NMR Spectrum of **14'** (Isolated) (CDCl<sub>3</sub>, 200 MHz, 298 K)

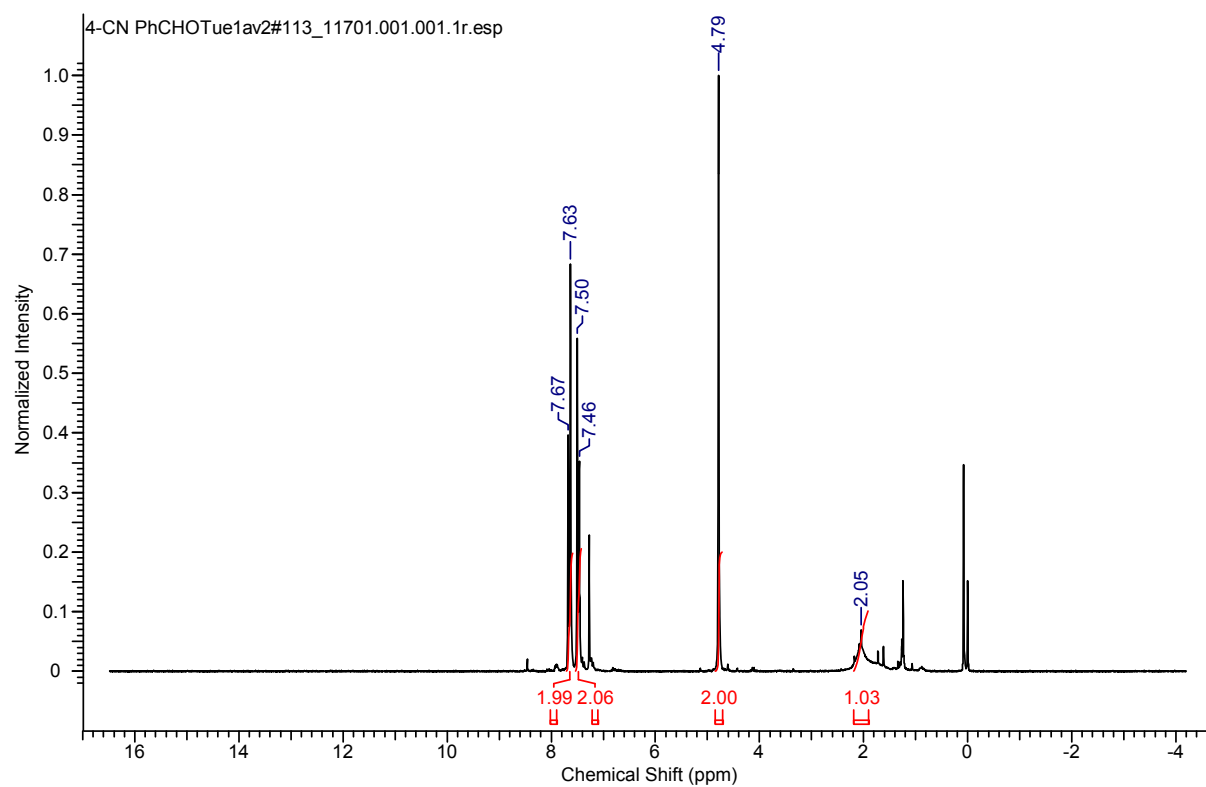

<sup>13</sup>C NMR spectrum of **14'** (Isolated) (CDCl<sub>3</sub>, 50.28 MHz, 298 K)

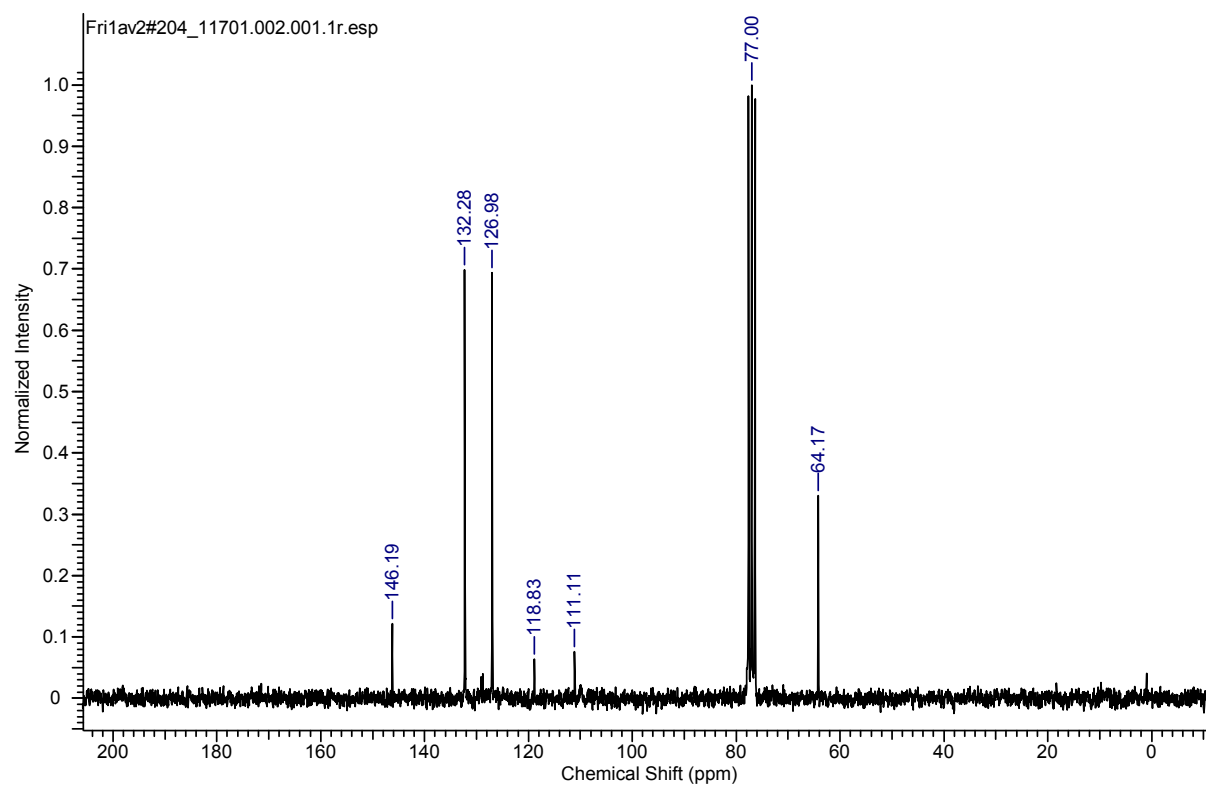

$^1\text{H}$  NMR Spectrum of **15** ( $\text{CDCl}_3$ , 200 MHz, 298 K)

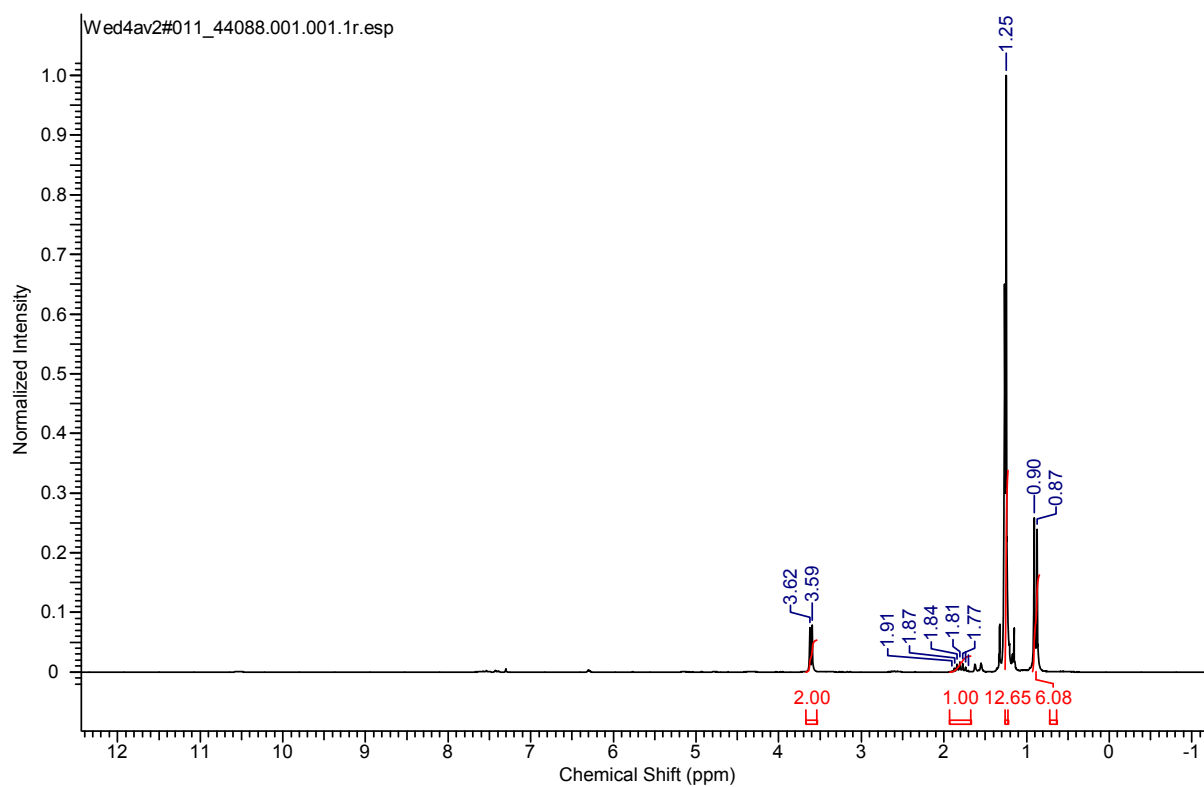

$^{13}\text{C}$  NMR spectrum of **15** ( $\text{CDCl}_3$ , 50.28 MHz, 298 K)

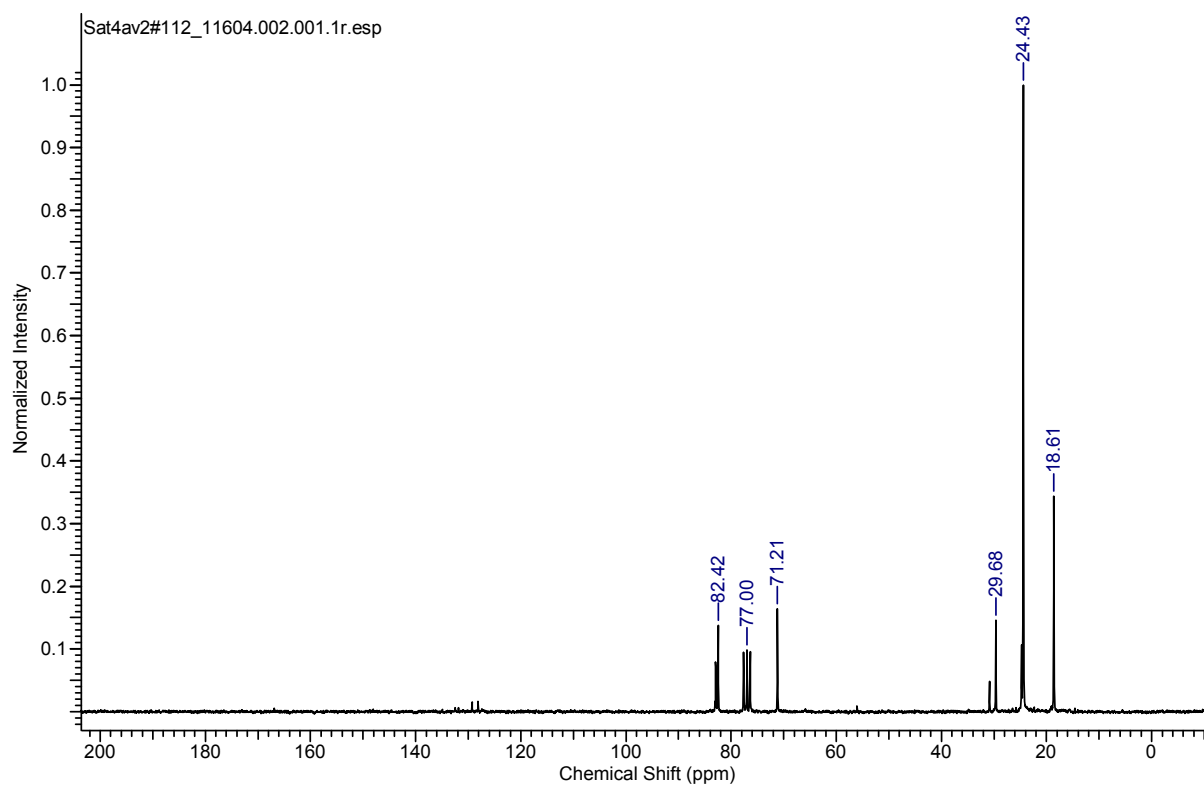



<sup>1</sup>H NMR Spectrum of Isolated **N-benzylaniline (16)** (CDCl<sub>3</sub>, 200 MHz, 298 K)

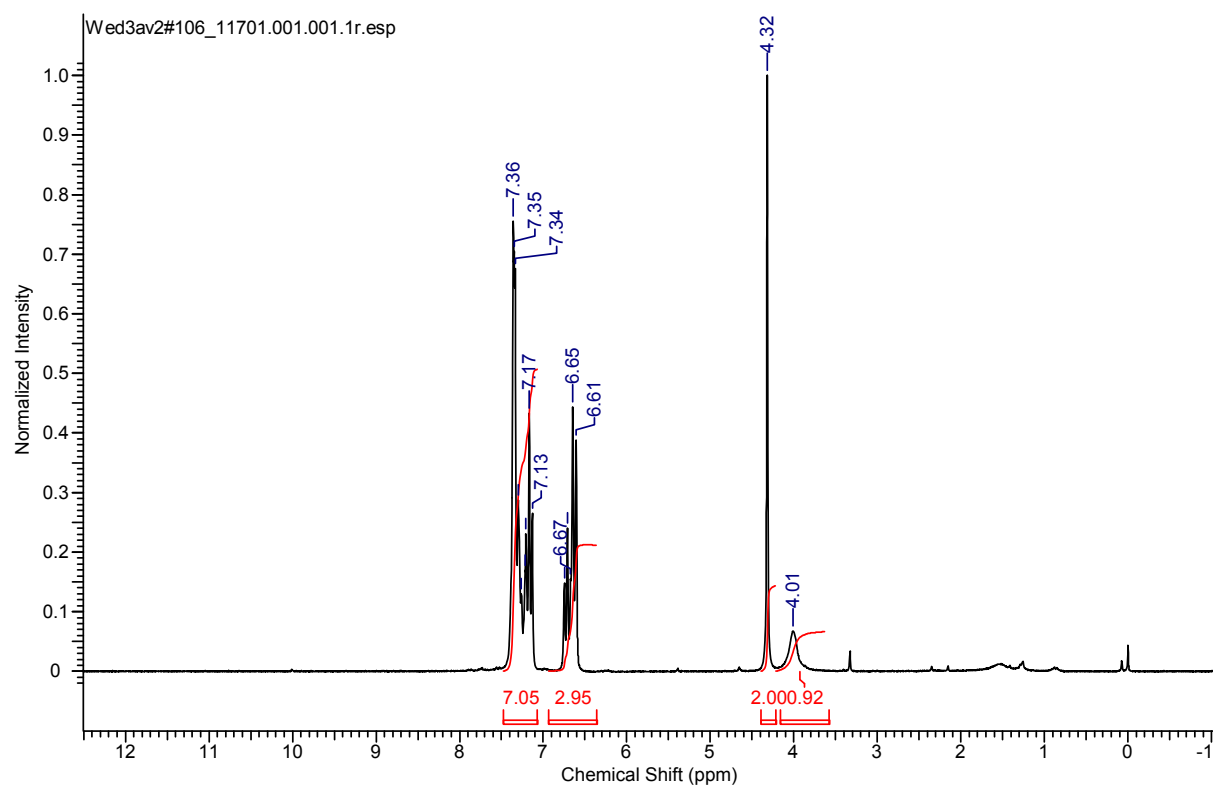

<sup>13</sup>C NMR spectrum of Isolated **N-benzylaniline (16)** (CDCl<sub>3</sub>, 50.28 MHz, 298 K)

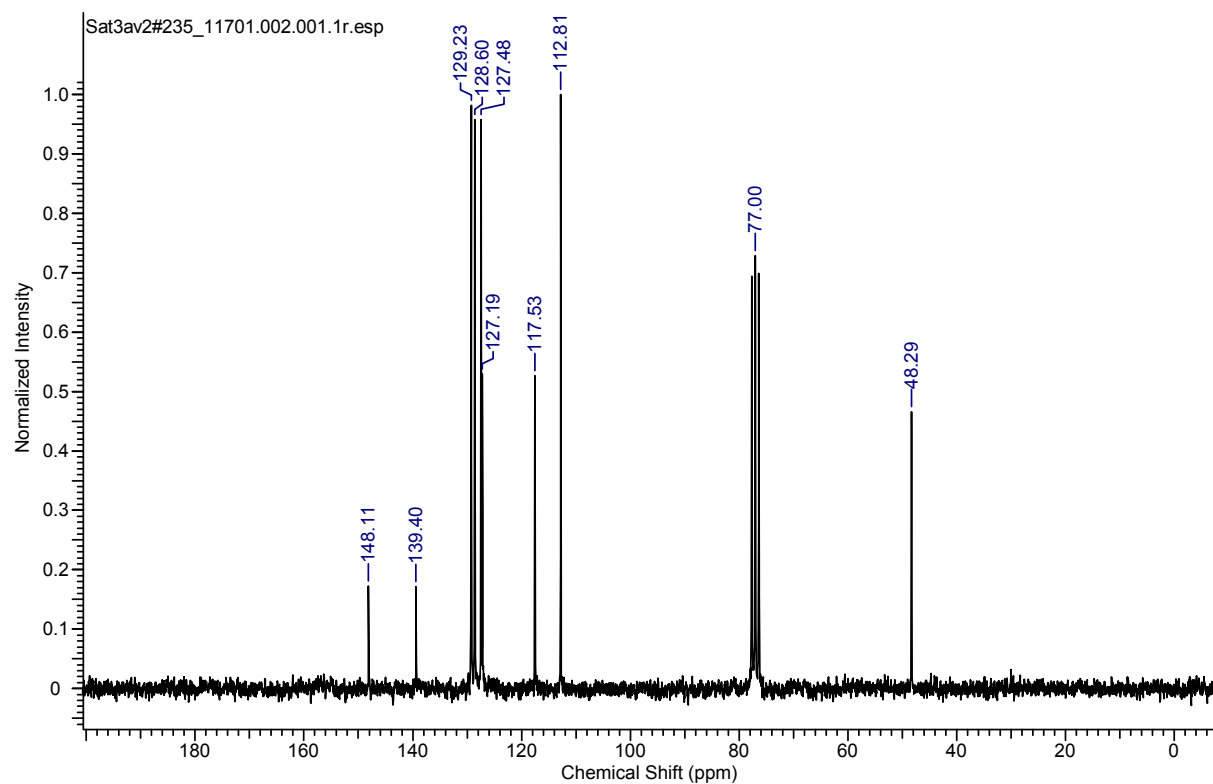

<sup>1</sup>H NMR Spectrum of Isolated N-(4-methylbenzyl)aniline (**17**) (CDCl<sub>3</sub>, 200 MHz, 298 K)

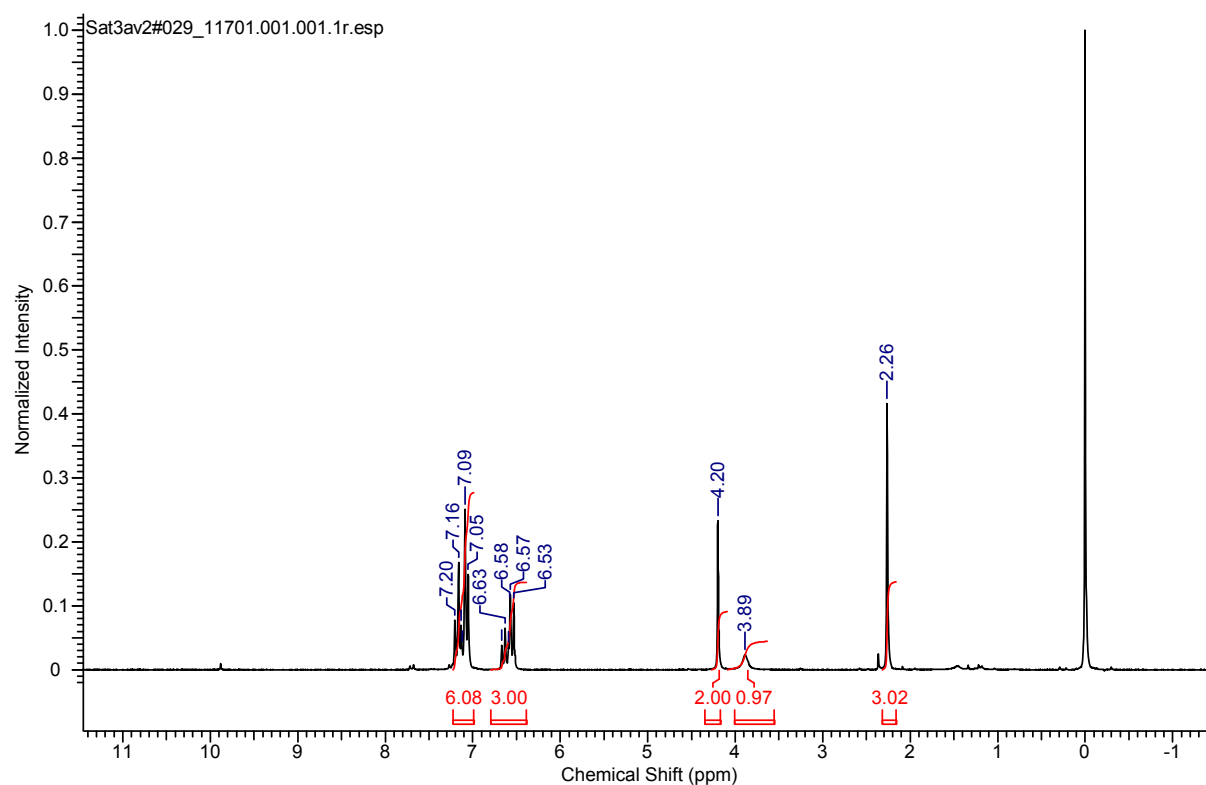

<sup>13</sup>C NMR Spectrum of Isolated N-(4-methylbenzyl)aniline (**17**) (CDCl<sub>3</sub>, 50.28 MHz, 298 K)

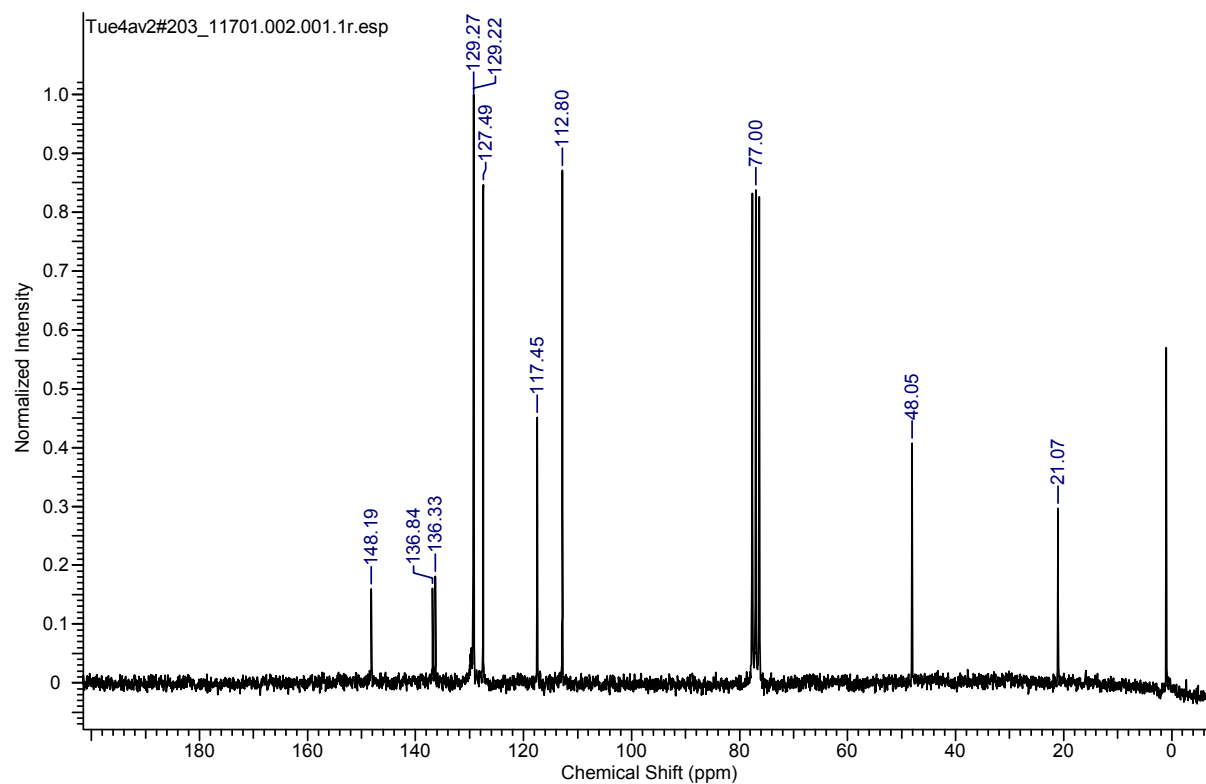

<sup>1</sup>H NMR Spectrum of Isolated N-(4-nitrobenzyl)aniline (**18**) (CDCl<sub>3</sub>, 200 MHz, 298 K)

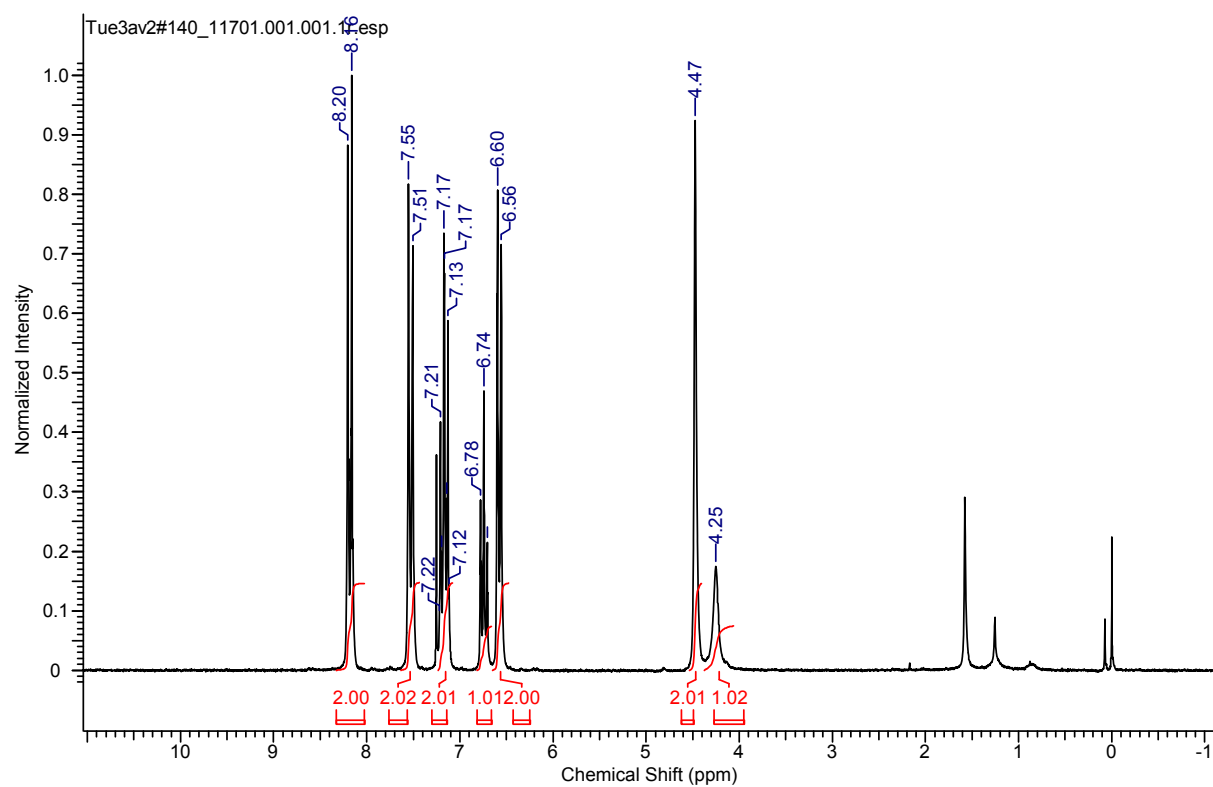

<sup>13</sup>C NMR Spectrum of Isolated N-(4-nitrobenzyl)aniline (**18**) (CDCl<sub>3</sub>, 50.28 MHz, 298 K)

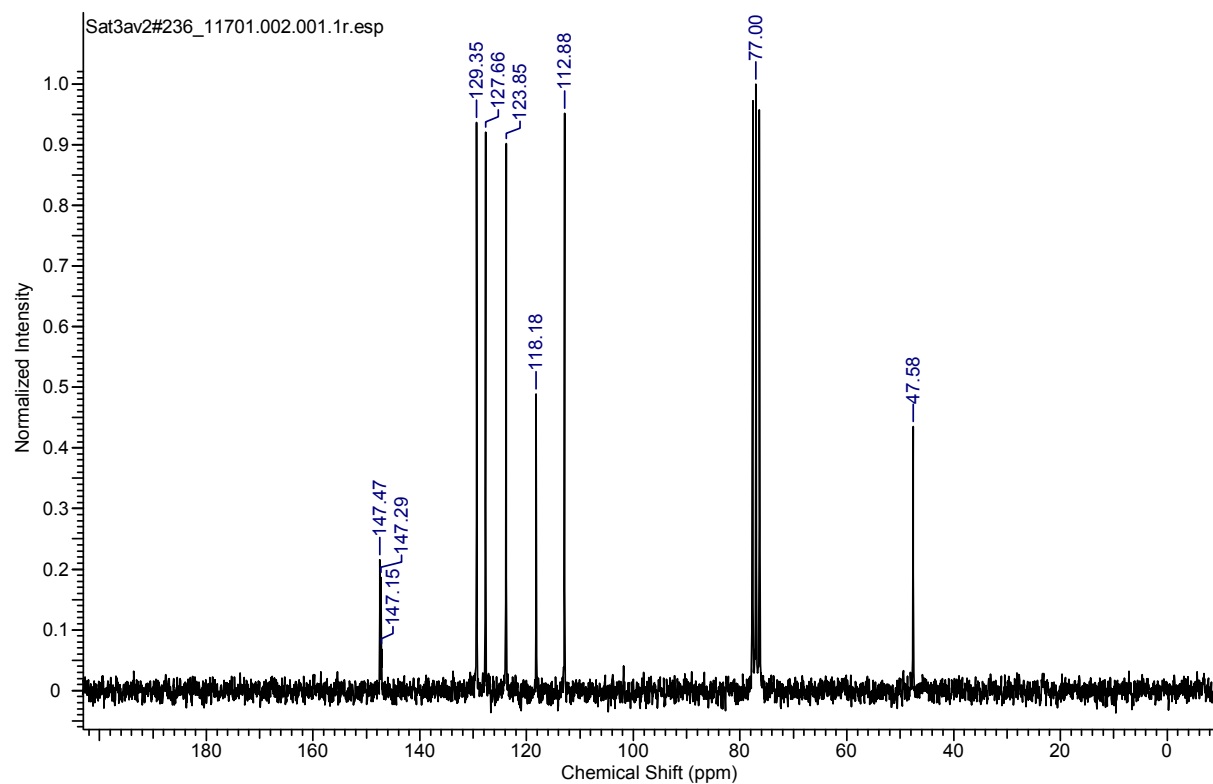

<sup>1</sup>H NMR Spectrum of Isolated **N-benzyl-4-ethylaniline (19)** (CDCl<sub>3</sub>, 200 MHz, 298 K)

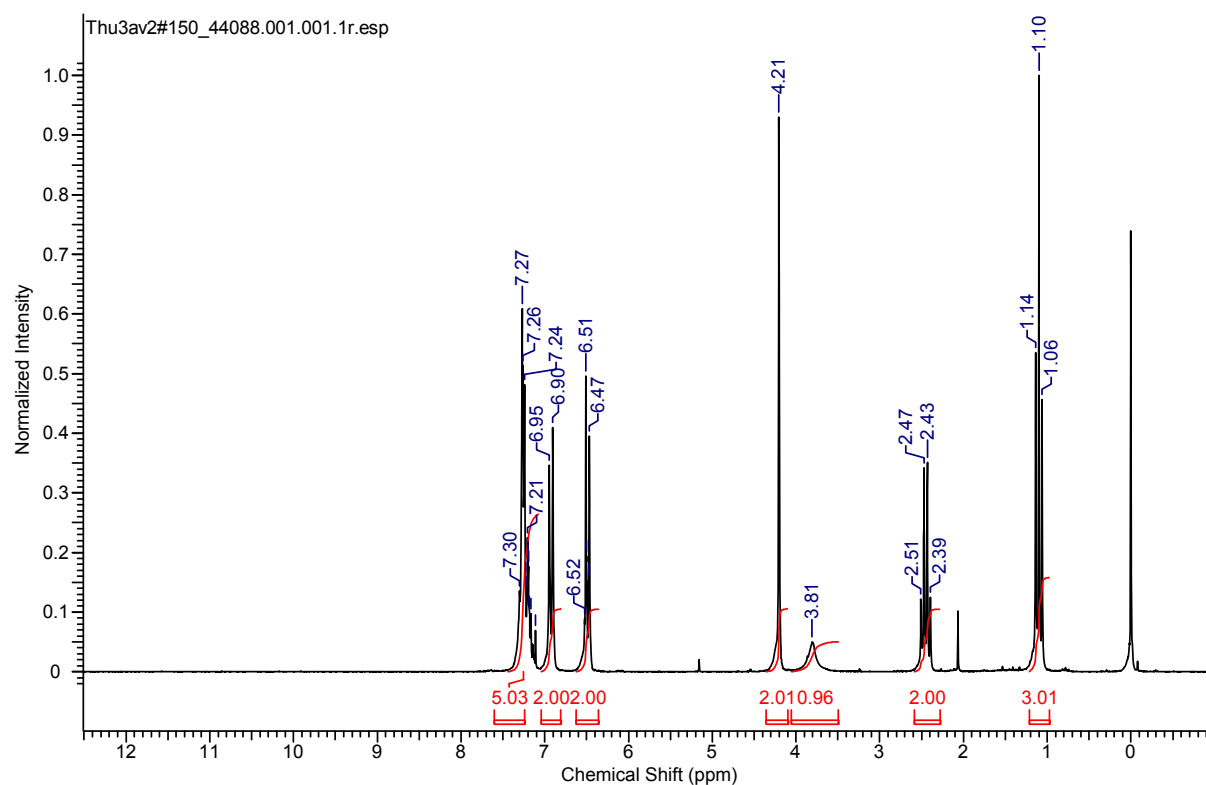

<sup>13</sup>C NMR Spectrum of Isolated **N-benzyl-4-ethylaniline (19)** (CDCl<sub>3</sub>, 50.28 MHz, 298 K)

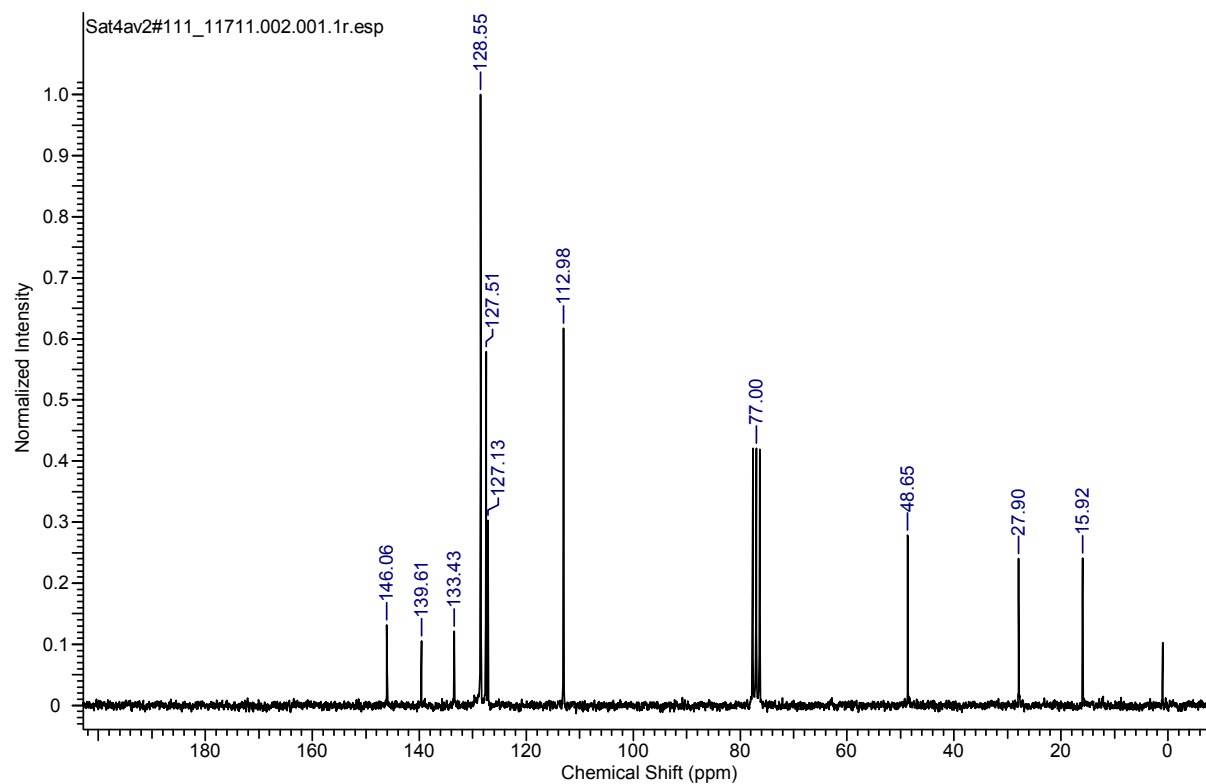

<sup>1</sup>H NMR Spectrum of Isolated N-(4-fluorobenzyl)aniline (**20**) (CDCl<sub>3</sub>, 200 MHz, 298 K)

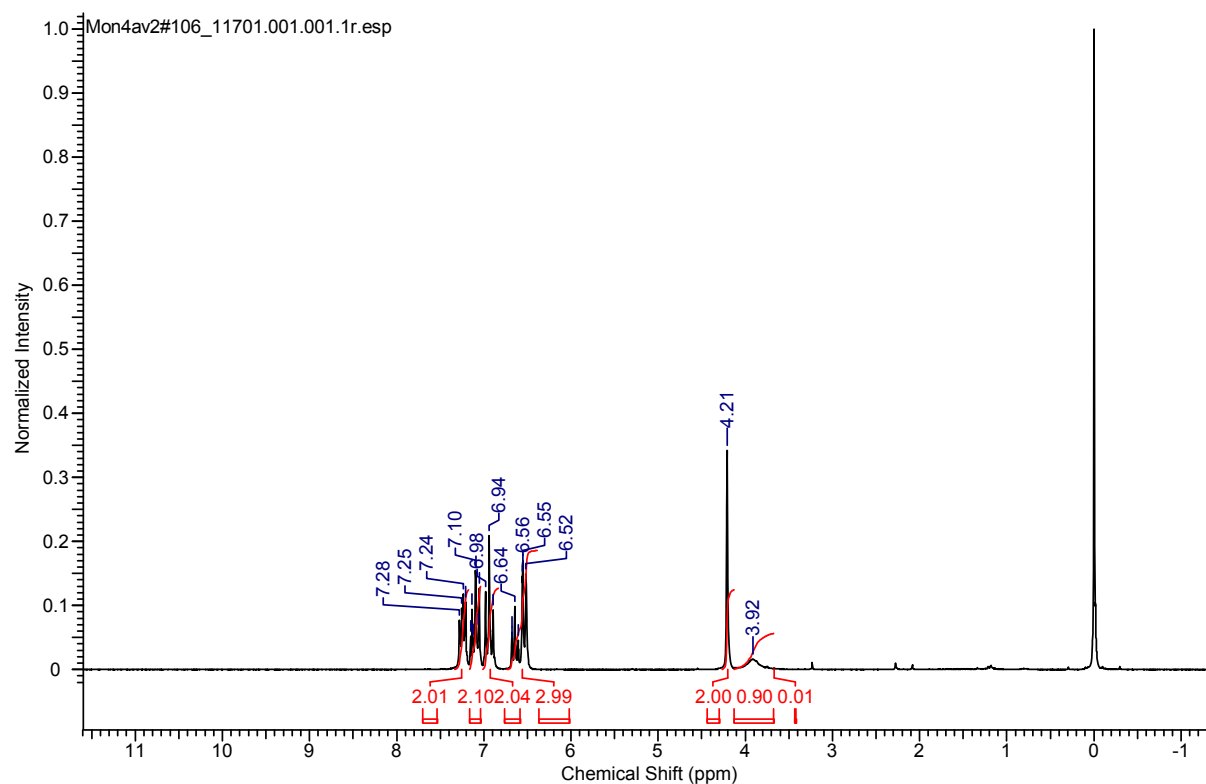

<sup>13</sup>C NMR Spectrum of Isolated N-(4-fluorobenzyl)aniline (**20**) (CDCl<sub>3</sub>, 50.28 MHz, 298 K)

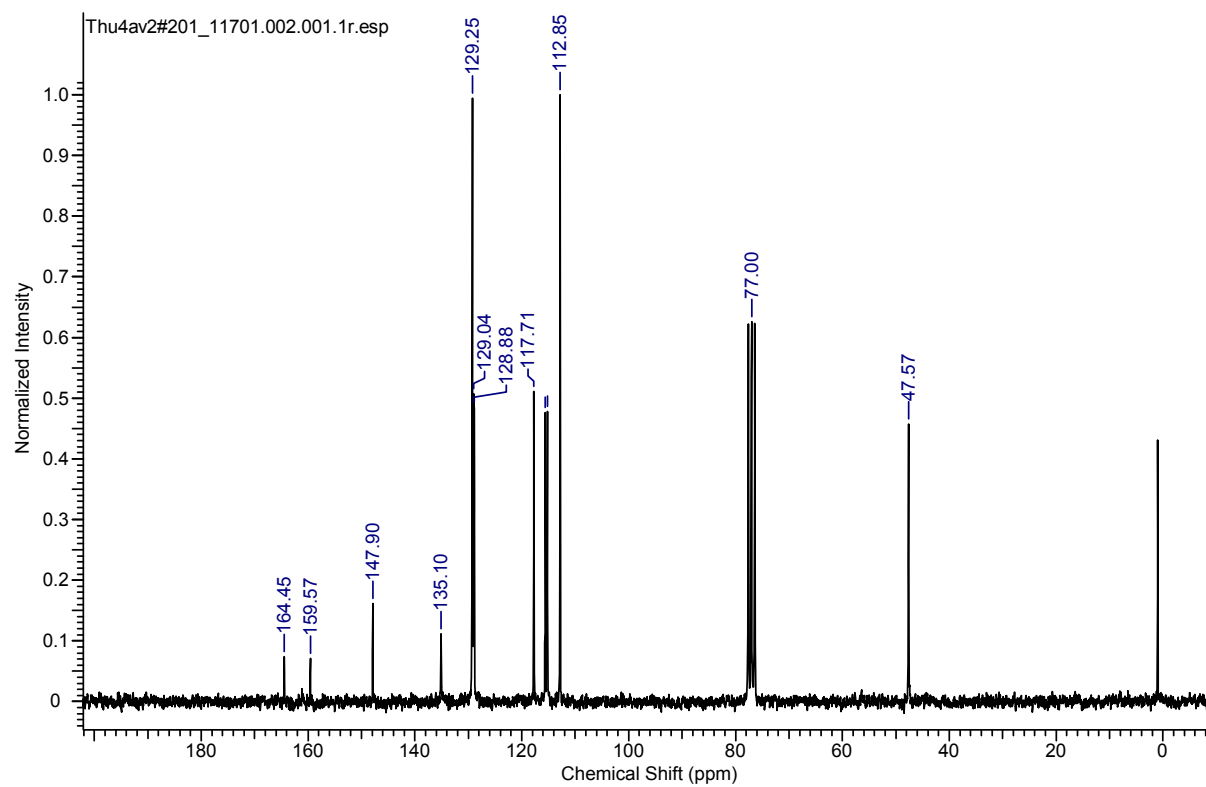

<sup>1</sup>H NMR Spectrum of Isolated **N-benzyl-4-fluoroaniline (21)** (CDCl<sub>3</sub>, 200 MHz, 298 K)

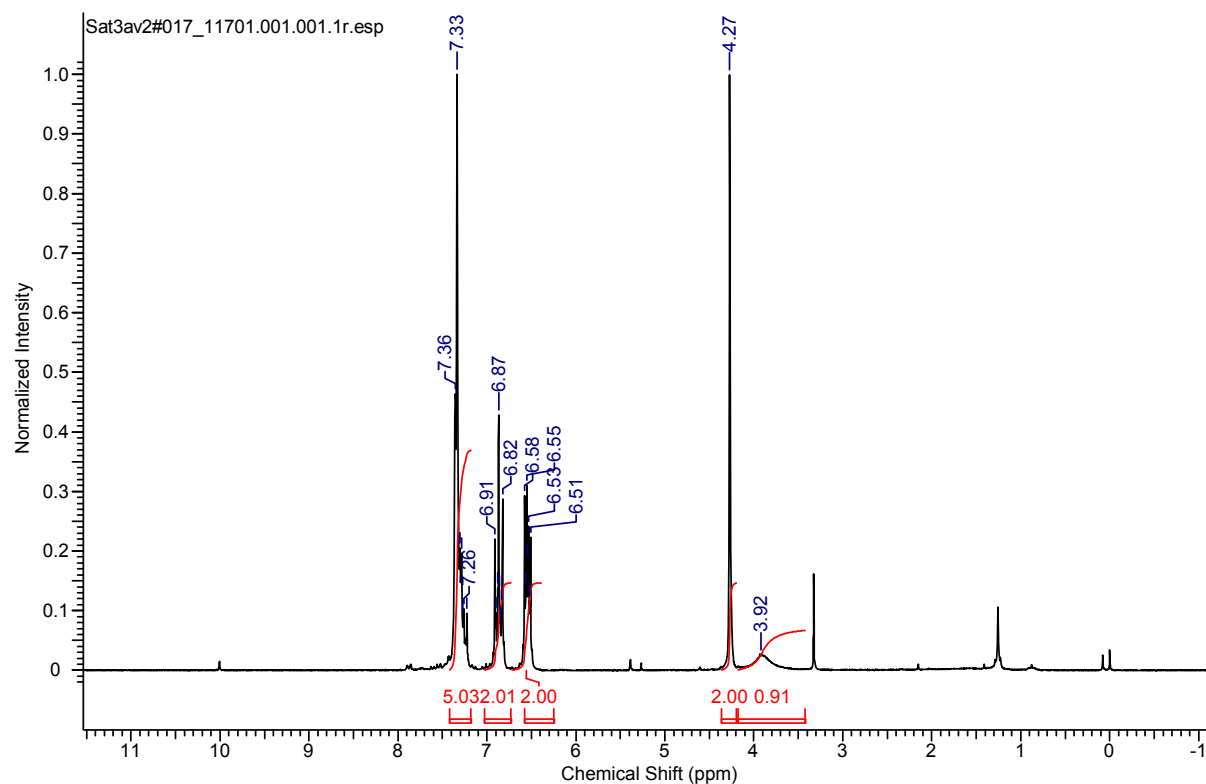

<sup>13</sup>C NMR Spectrum of Isolated **N-benzyl-4-fluoroaniline (21)** (CDCl<sub>3</sub>, 50.28 MHz, 298 K)

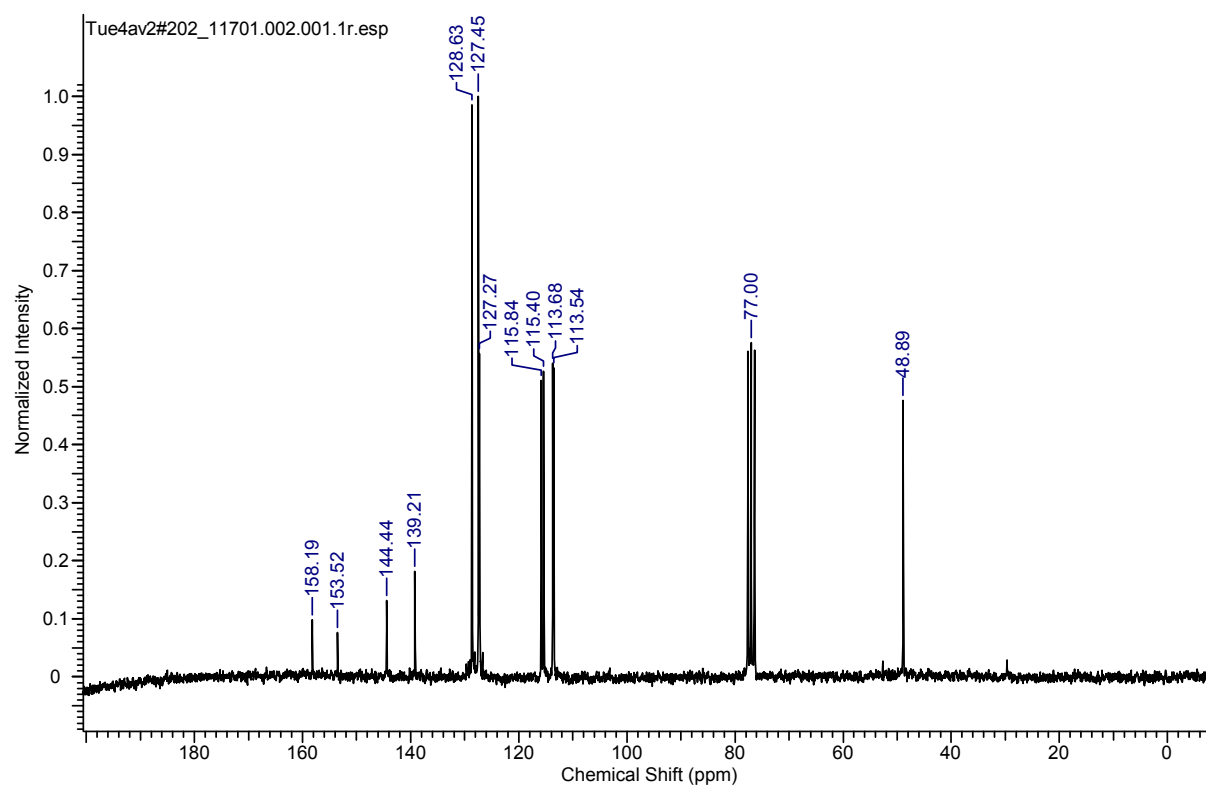

<sup>1</sup>H NMR Spectrum of Isolated 4-((phenylamino)methyl)benzotrile (22) (CDCl<sub>3</sub>, 200 MHz, 298 K)

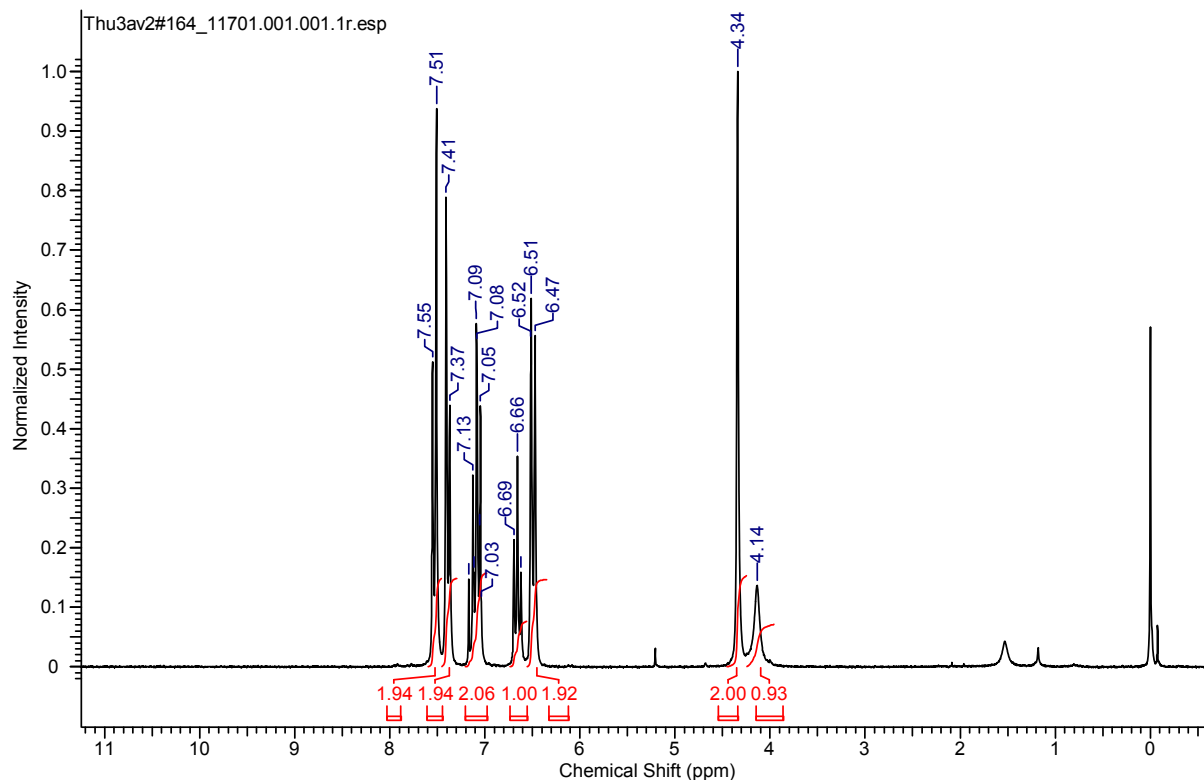

<sup>13</sup>C NMR Spectrum of Isolated 4-((phenylamino)methyl)benzotrile (22) (CDCl<sub>3</sub>, 50.28 MHz, 298 K)

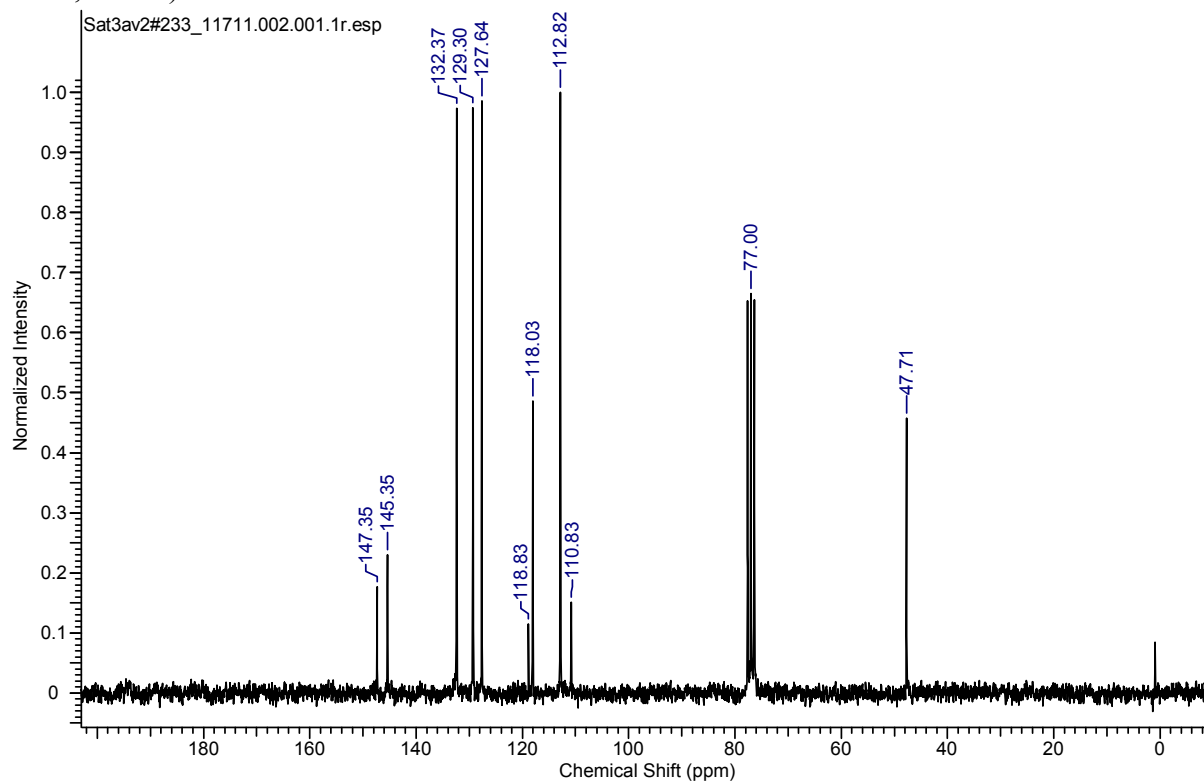

$^1\text{H}$  NMR Spectrum of isolated **N-(4-fluorobenzyl)-2,4,6-trimethylaniline (23)** ( $\text{CDCl}_3$ , 200 MHz, 298 K)

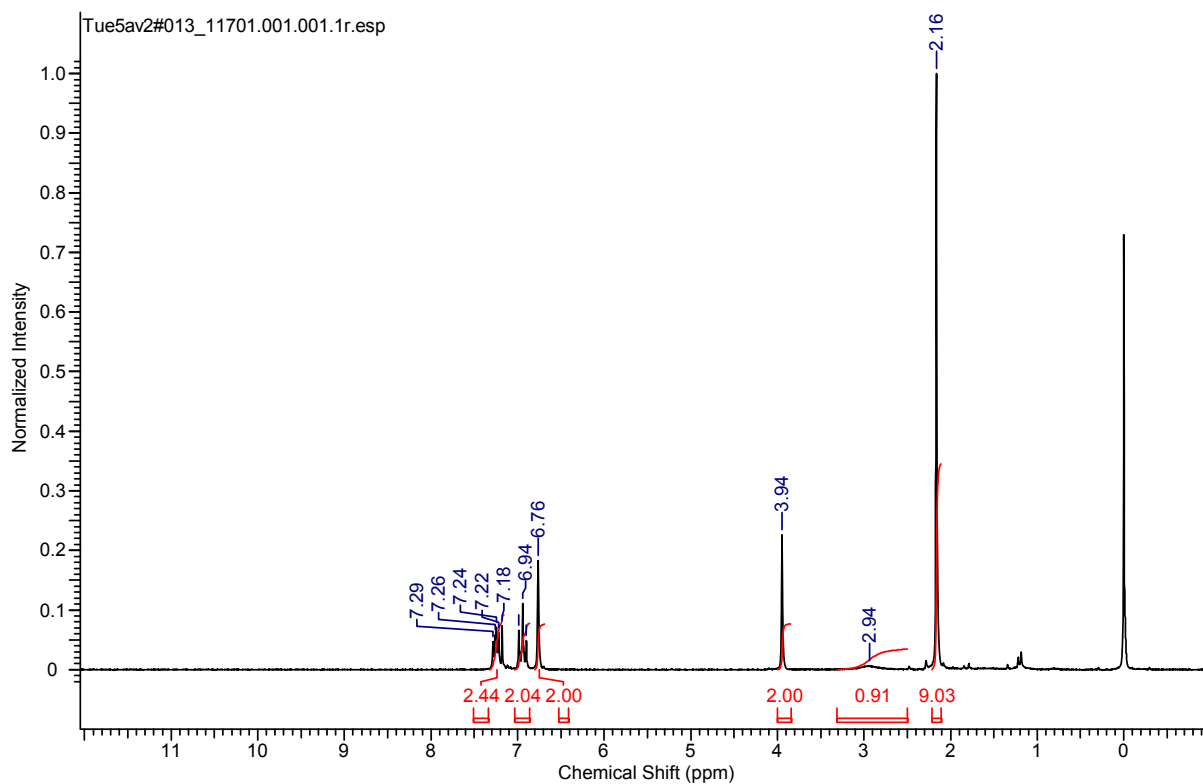

$^1\text{H}$  NMR Spectrum of **Int-2** ( $\text{CDCl}_3$ , 200 MHz, 298 K)

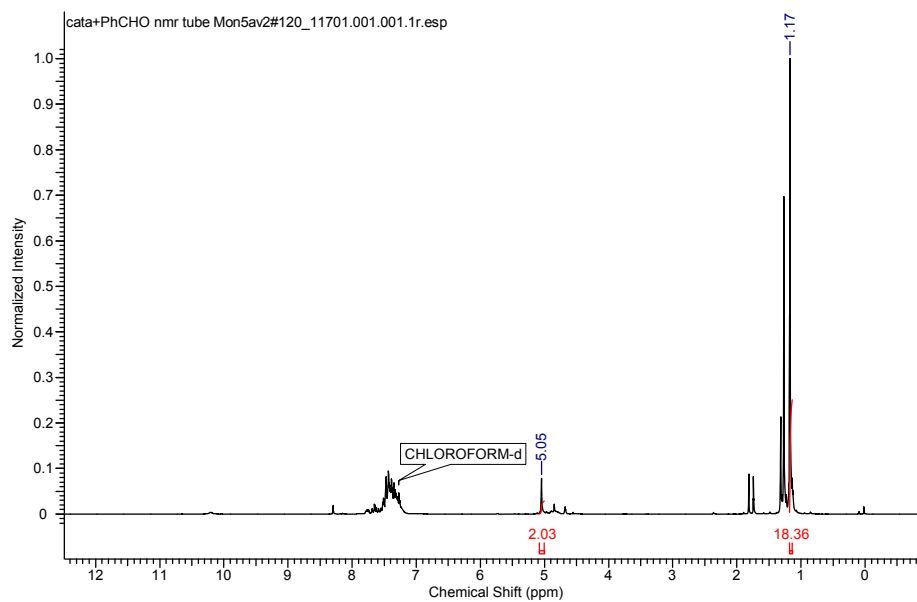



$^{29}\text{Si}\{^1\text{H}\}$  NMR Spectrum of **Int-2** ( $\text{CDCl}_3$ , 200 MHz, 298 K)

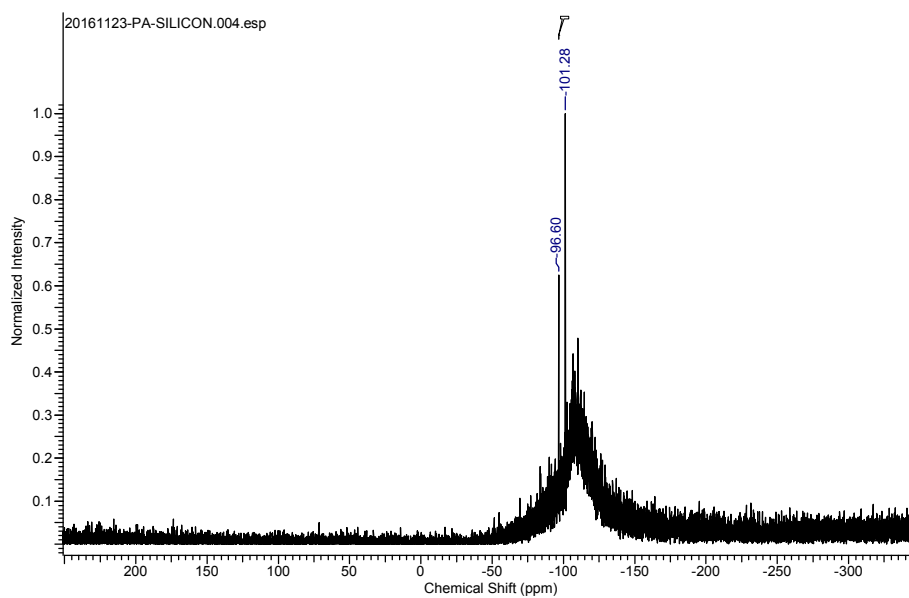

$^1\text{H}$  NMR of  $\text{PhC}(\text{N}t\text{Bu})_2\text{SiCl}_3$  ( $\text{CDCl}_3$ , 200MHz, 298K):

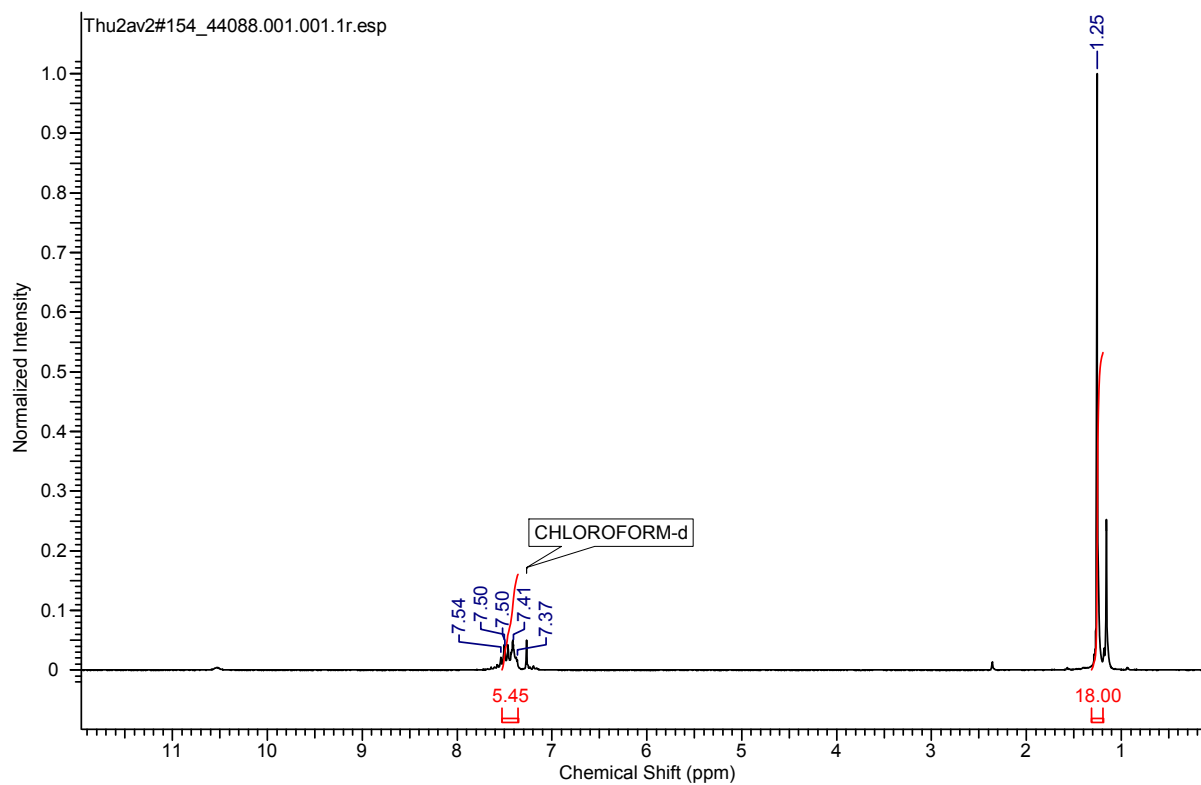

$^1\text{H}$  NMR of BnOK( $\text{CDCl}_3$ , 200MHz, 298K):

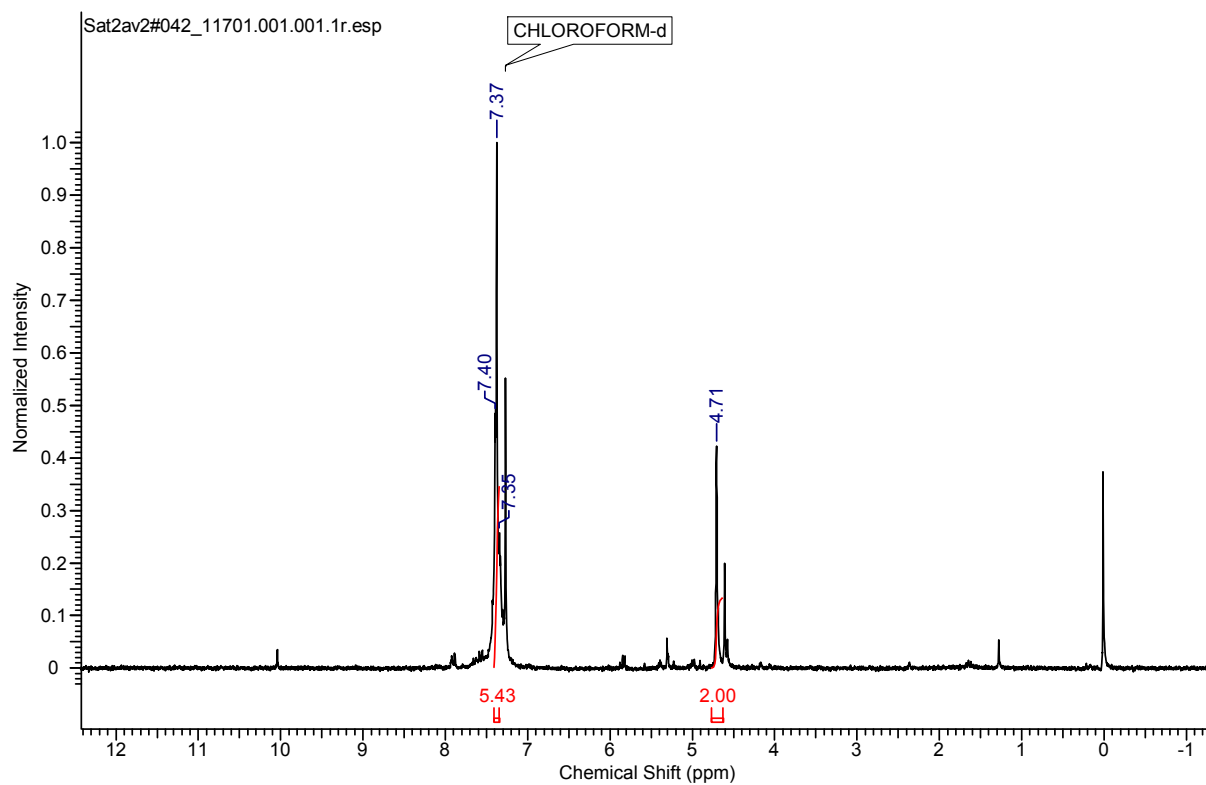

$^1\text{H}$  NMR of **Int-2** ( $\text{CDCl}_3$ , 200 MHz, 298K):

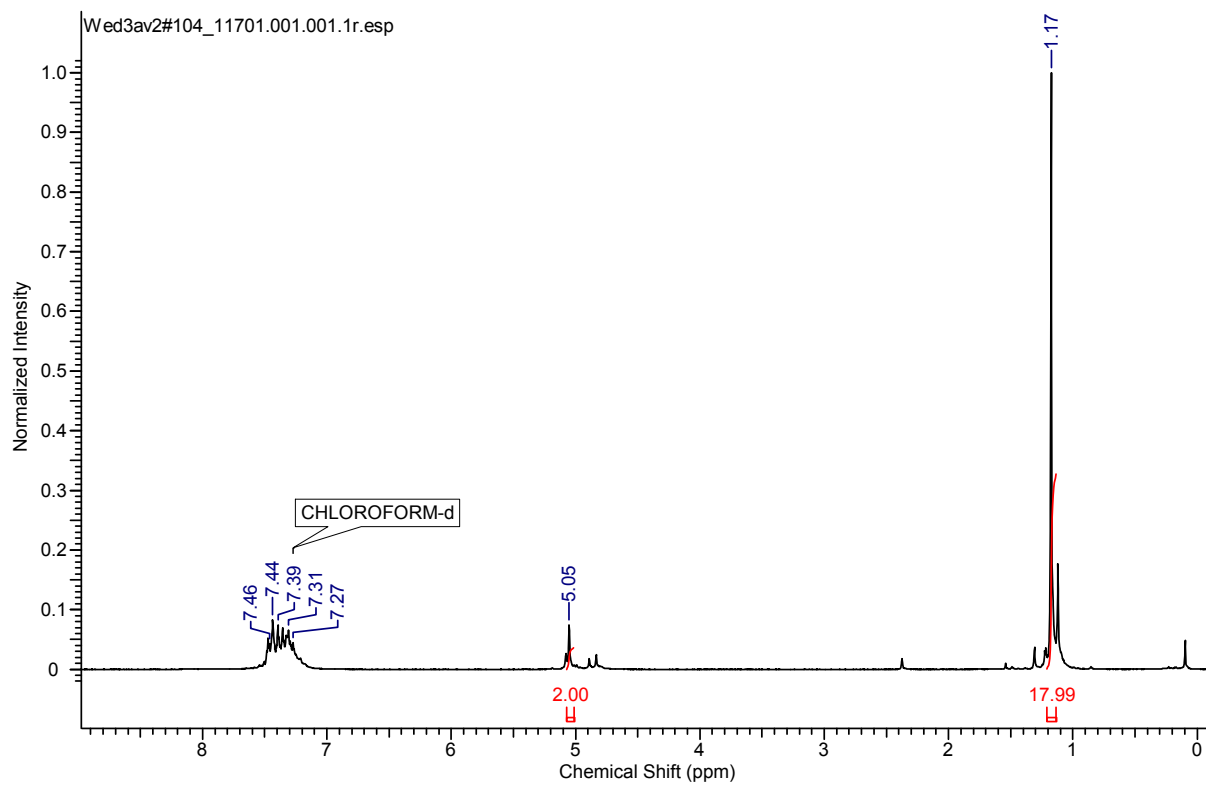

$^1\text{H}$  NMR of the reaction of **Int-2** with HBpin ( $\text{CDCl}_3$ , 200MHz, 298K):

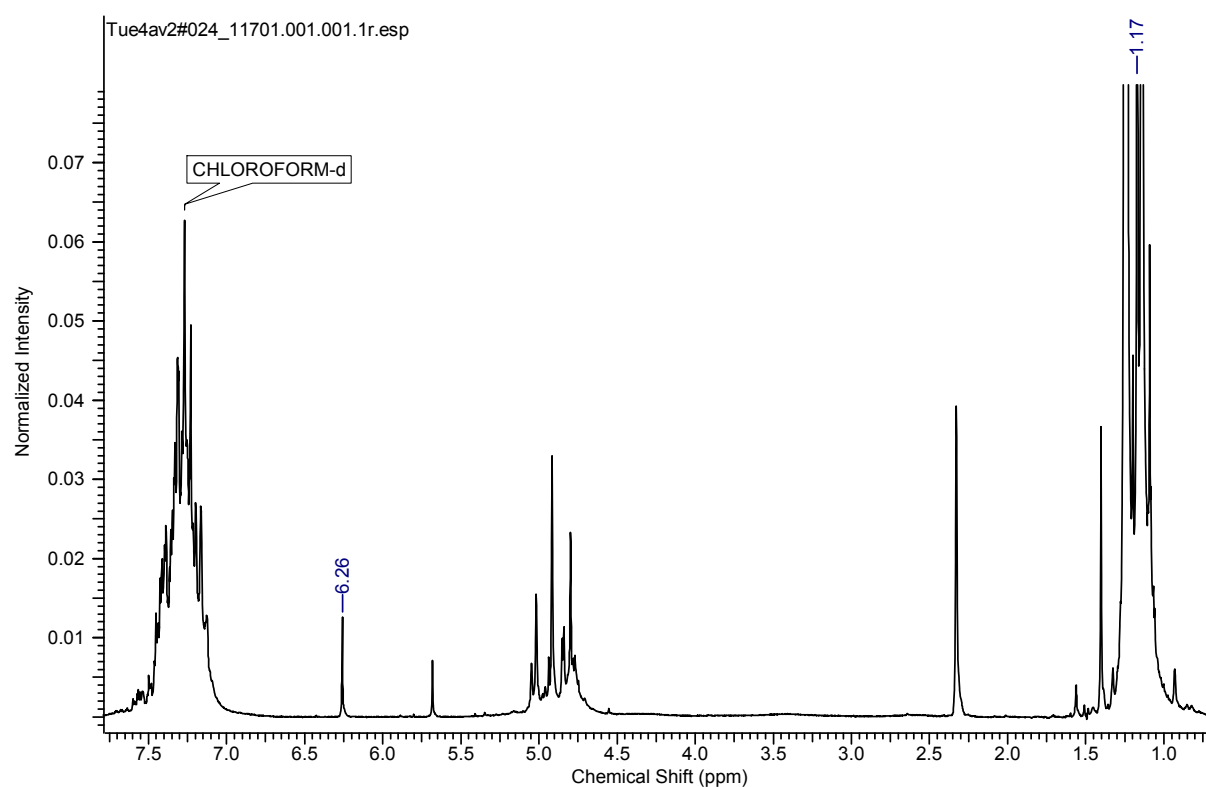

## References:

- [S1] H. Wang, C. Wang, K. Huang, L. Liu, W. Chang and J. Li, *Org. Lett.*, 2016, **18**, 2367–2370.
- [S2] S. S. Sen, H. W. Roesky, D. Stern, J. Henn and D. Stalke, *J. Am. Chem. Soc.*, 2010, **132**, 1123–1126.
- [S3] R. Ahlrichs, M. Bar, M. Häser, H. Horn and C. Kölmel, *Chem. Phys. Lett.*, 1989, **162**, 165–169.
- [S4] J. P. Perdew, K. Burke and M. Ernzerhof, *Phys. Rev. Lett.*, 1996, **77**, 3865–3868.
- [S5] S. Ansgar, H. Christian and A. J. Reinhart, *Chem. Phys.*, 1994, **100**, 5829–5835.
- [S6] K. Eichkorn, O. Treutler, H. Öhm, M. Häser and R. Ahlrichs, *Chem. Phys. Lett.*, 1995, **240**, 283–289.
- [S7] M. Sierka, A. Hogekamp and R. Ahlrichs, *J. Chem. Phys.*, 2003, **118**, 9136–9148.
- [S8] A. Klamt and G. Schuurmann, *J. Chem. Soc., Perkin Trans.*, 1993, 799–805.
- [S9] S. Kozuch and S. Shaik, *Acc. Chem. Res.*, 2010, **44**, 101–110
- [S10] S. Kozuch and J. M. L. Martin, *ACS Catal.*, 2011, **1**, 246–253.
- [S11] A. Uhe, S. Kozuch and S. Shaik, *J. Comput. Chem.*, 2010, **32**, 978–985.
